# Supplementary material
Source: publisher figshare collection journal article supplement (https://plos.figshare.com/articles/dataset/_/4482074)

# Chemical Characterization of Lipophilic Constituents in the Skin of Migratory Adult Sea Lamprey from the Great Lakes Region

Amila A. Dissanayake,<sup>1</sup> Muraleedharan G. Nair,<sup>1,3\*</sup>

Bioactive Natural Products and Phytoceuticals Laboratory, Department of Horticulture,  
Michigan State University, East Lansing, Michigan 48824, USA

## Supplemental data

For compound **5**

**Figure A.** <sup>1</sup>H NMR spectrum **5** in CDCl<sub>3</sub>

**Figure B.** <sup>13</sup>C NMR spectrum of **5** in CDCl<sub>3</sub>

**Figure C.** HMBC spectrum **5** in CDCl<sub>3</sub>

**Figure D.** GC profile of methyl esters of compound **5**

**Figure E.** GCMS of the hexadecanoic acid, methyl ester

For triglyceride mixture **F**

**Figure F.** GCMS of the 9-hexadecenoic acid, methyl ester (Z)

**Figure G.** <sup>1</sup>H NMR spectrum of triglyceride mixture **F** in CDCl<sub>3</sub>

**Figure H.** GC profile of methyl esters of triglyceride mixture

For compound **6**

**Figure I.** <sup>1</sup>H NMR spectrum **6** in CDCl<sub>3</sub>

**Figure J.** <sup>13</sup>C NMR spectrum **6** in CDCl<sub>3</sub>

**Figure K.** HSQC spectrum **6** in CDCl<sub>3</sub>

**Figure L.** GCMS of compound **6**

For compound **7**

**Figure M.** <sup>1</sup>H NMR spectrum **7** in CDCl<sub>3</sub>

**Figure N.** <sup>13</sup>C NMR spectrum **7** in CDCl<sub>3</sub>

**Figure O.** HSQC spectrum **7** in CDCl<sub>3</sub>

**Figure P.** HMBC spectrum **7** in CDCl<sub>3</sub>

**Figure Q.** GCMS of the compound **7**

For compound **8**

**Figure R.** <sup>1</sup>H NMR spectrum **8** in CDCl<sub>3</sub>

**Figure S.** <sup>13</sup>C NMR spectrum **8** in CDCl<sub>3</sub>

For compound **9**

**Figure T.** <sup>1</sup>H NMR spectrum **9** in CDCl<sub>3</sub>

**Figure U.** <sup>13</sup>C NMR spectrum **9** in CDCl<sub>3</sub>

For compound **10**

**Figure V.** <sup>1</sup>H NMR spectrum of **10** in CDCl<sub>3</sub>



Figure A

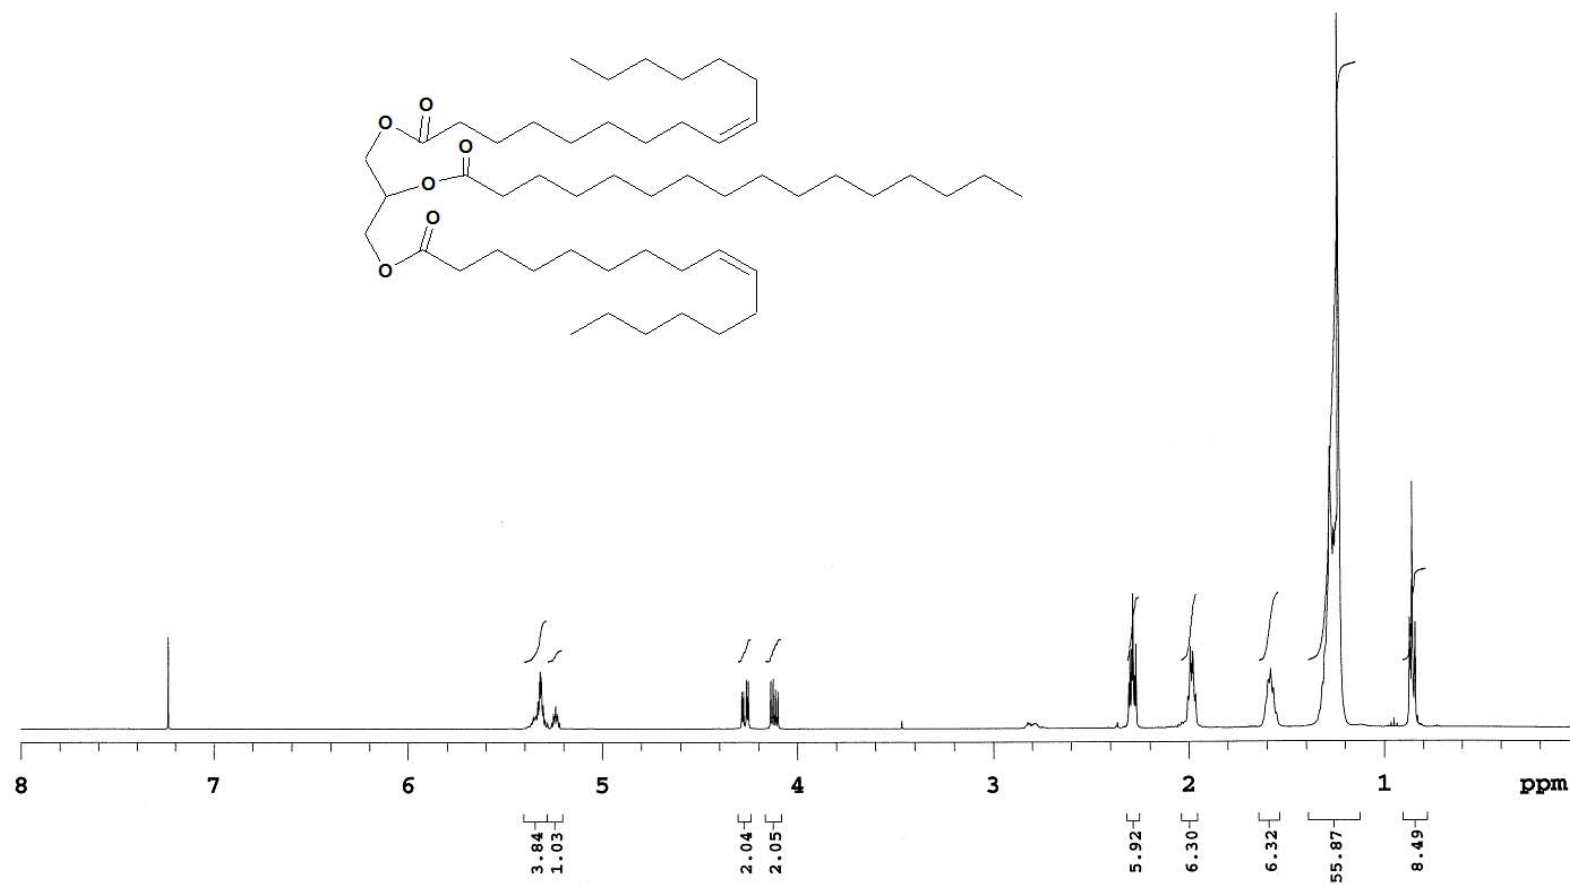



Figure B

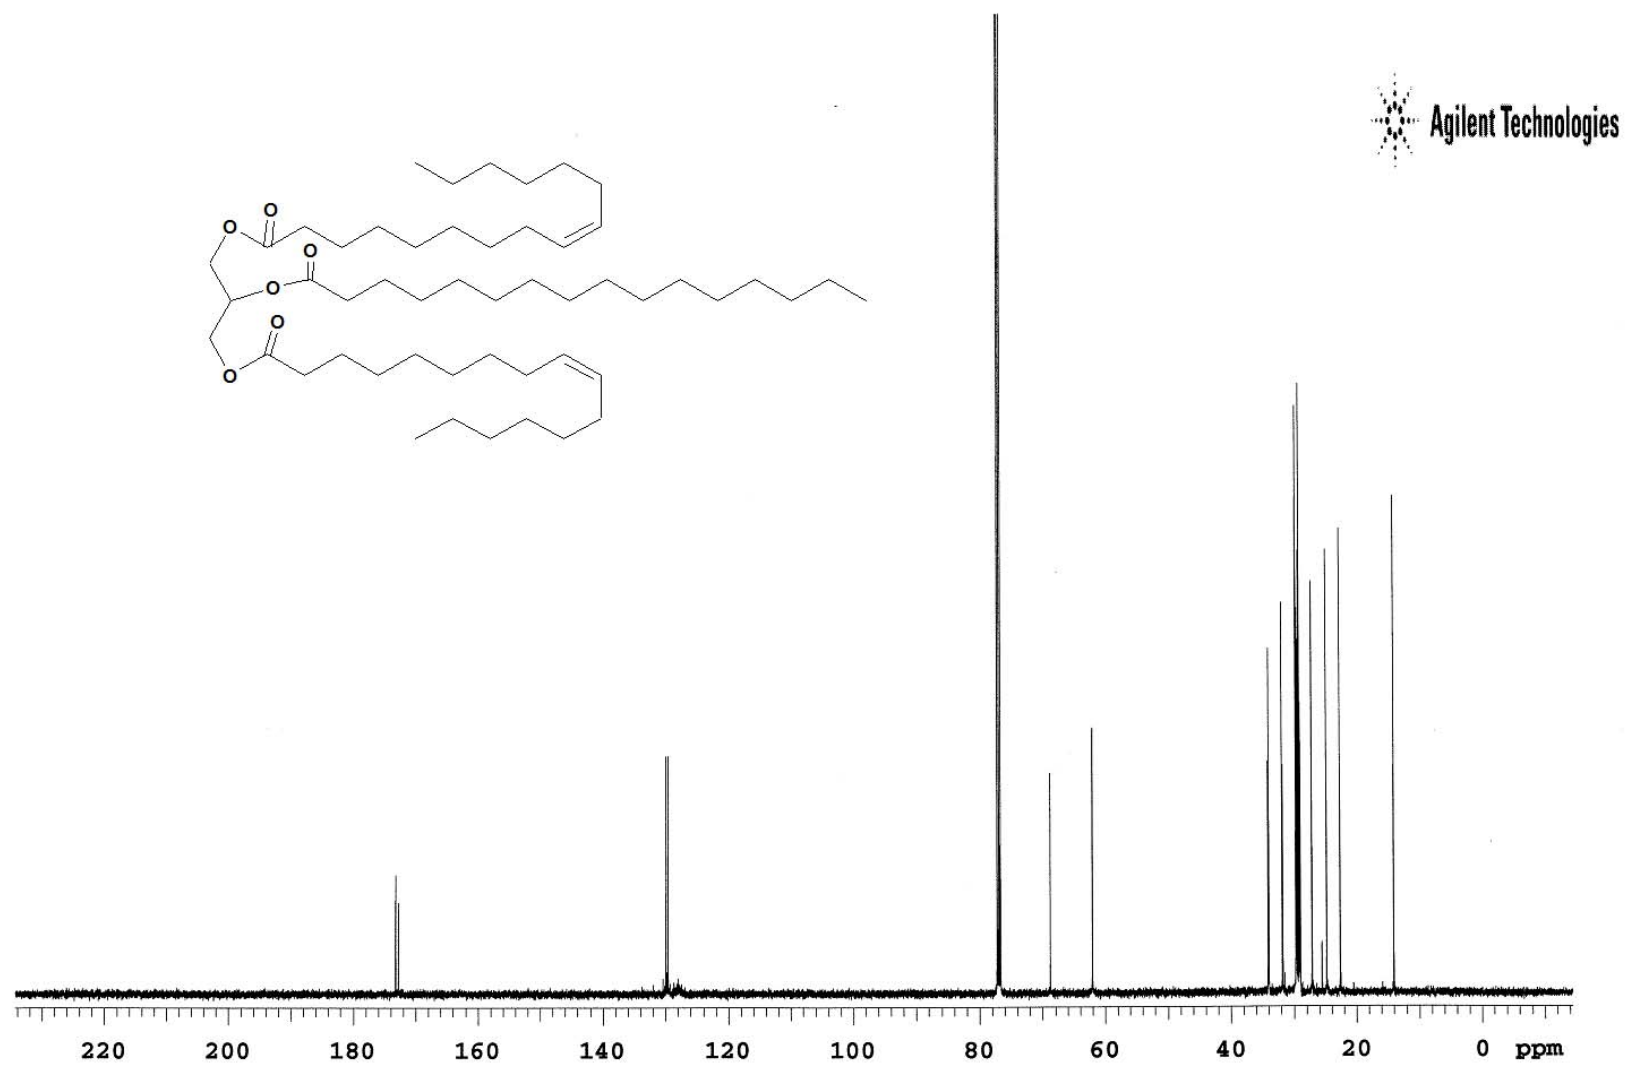



Figure C

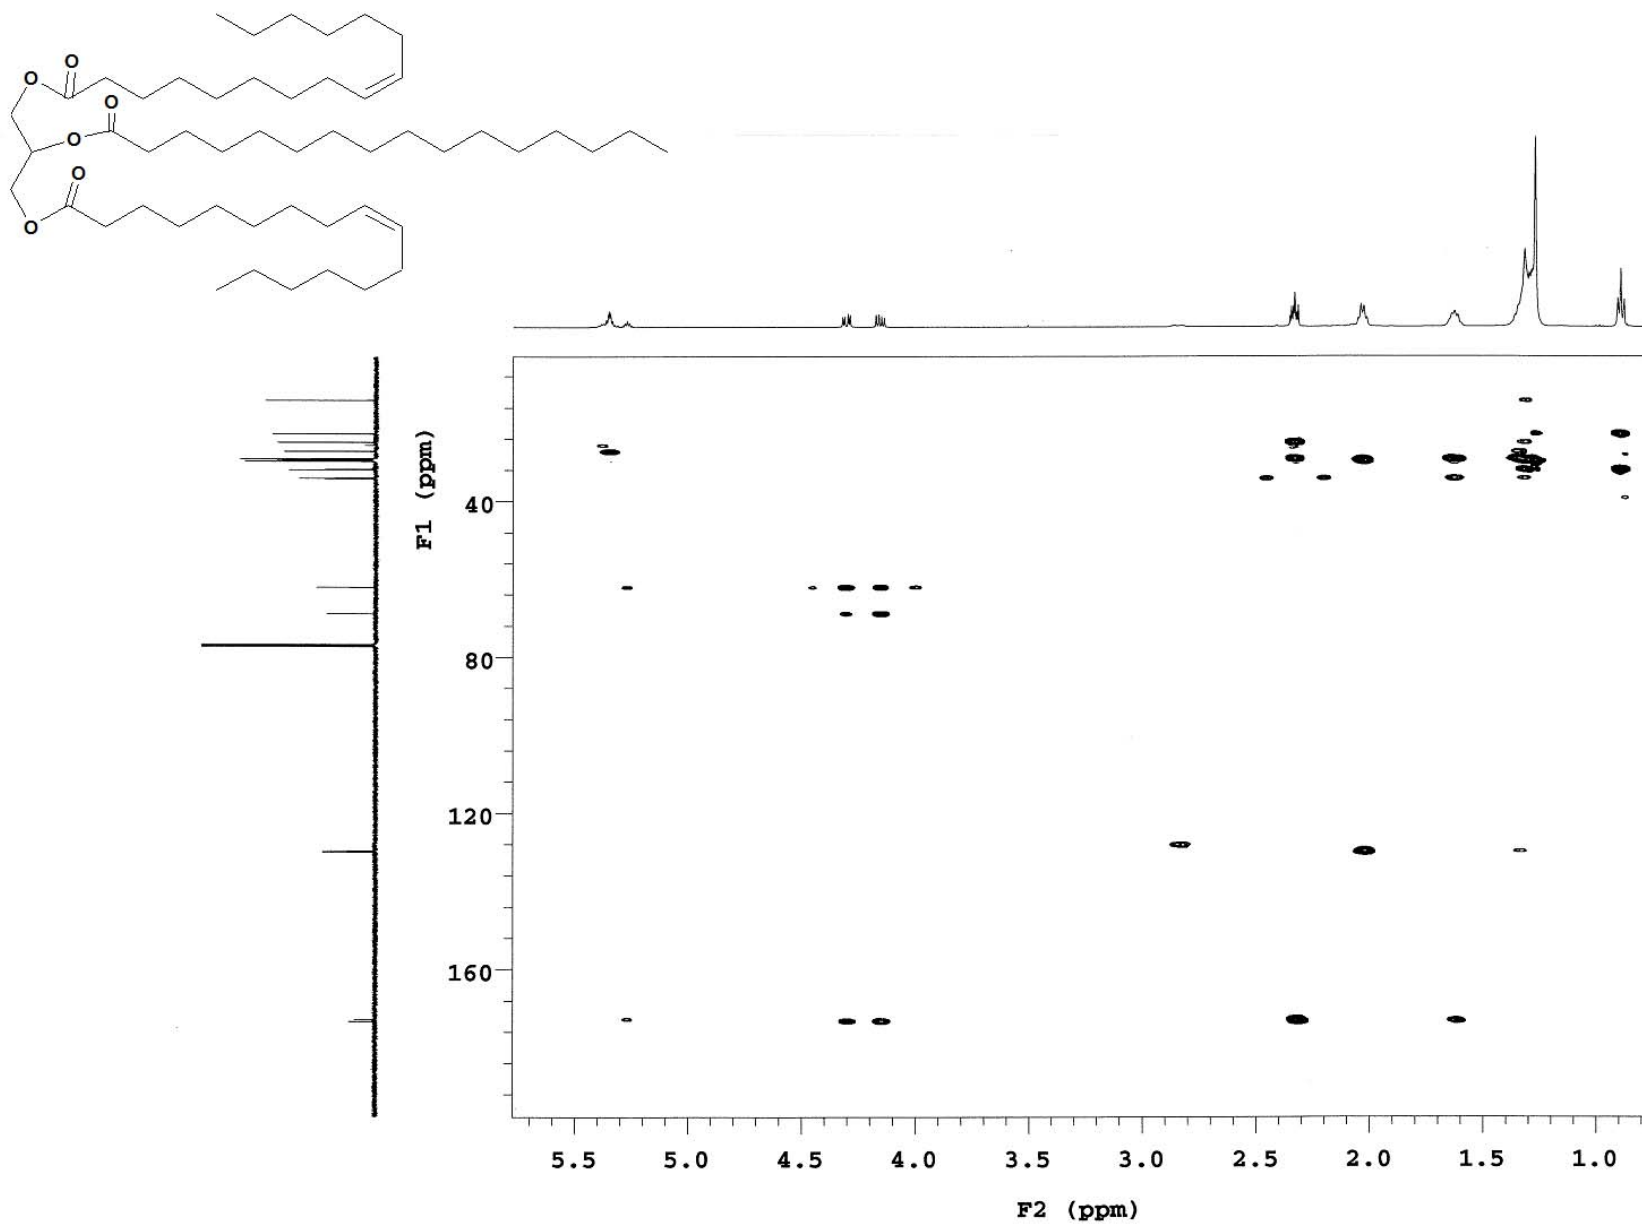



Figure D

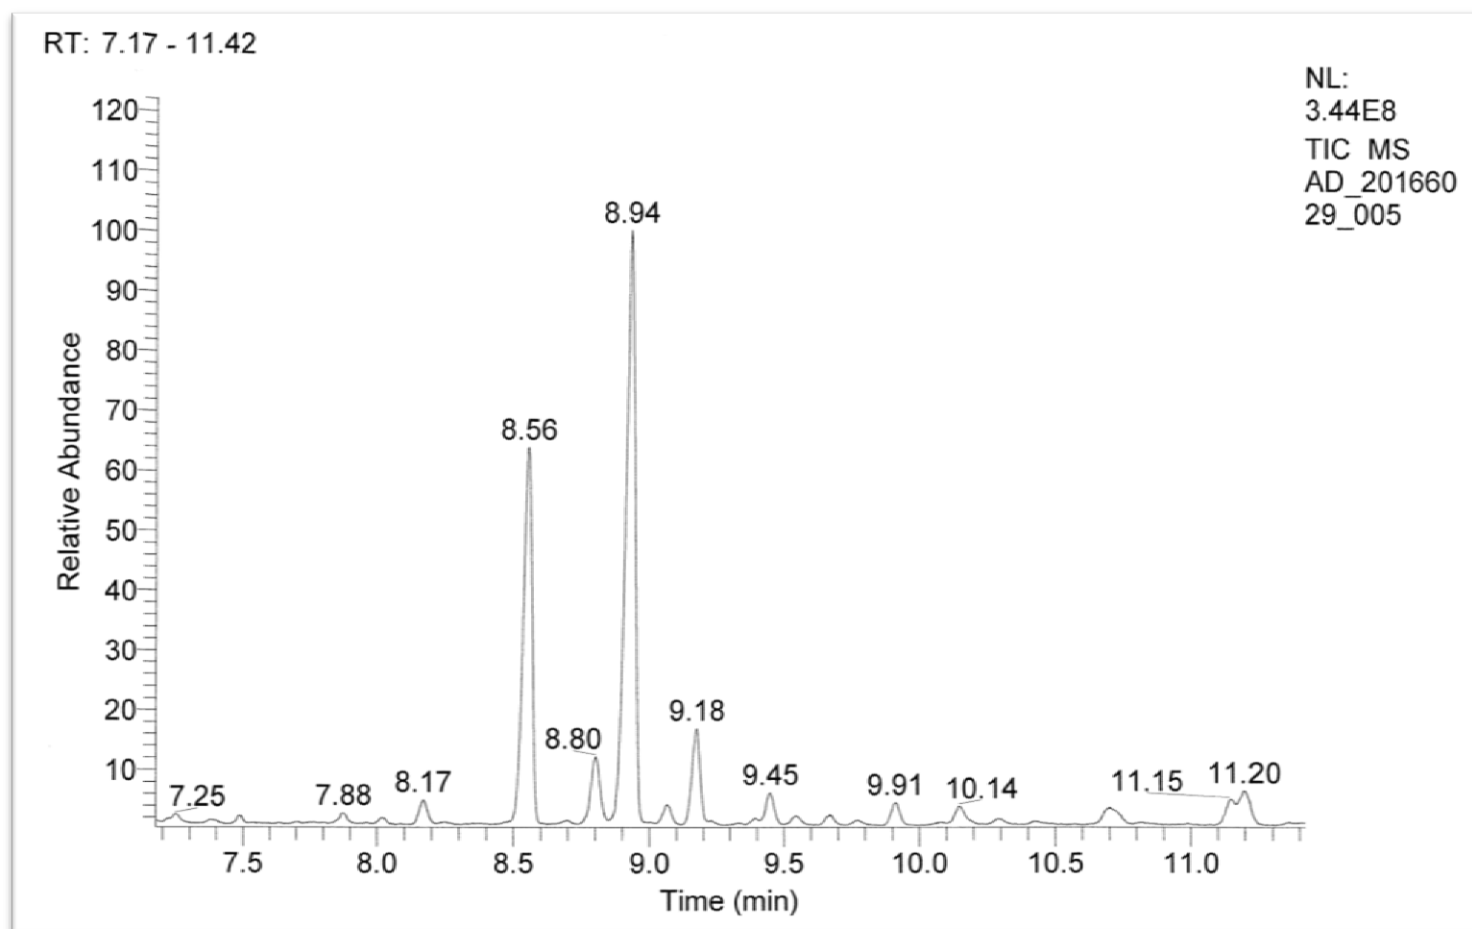



Figure E

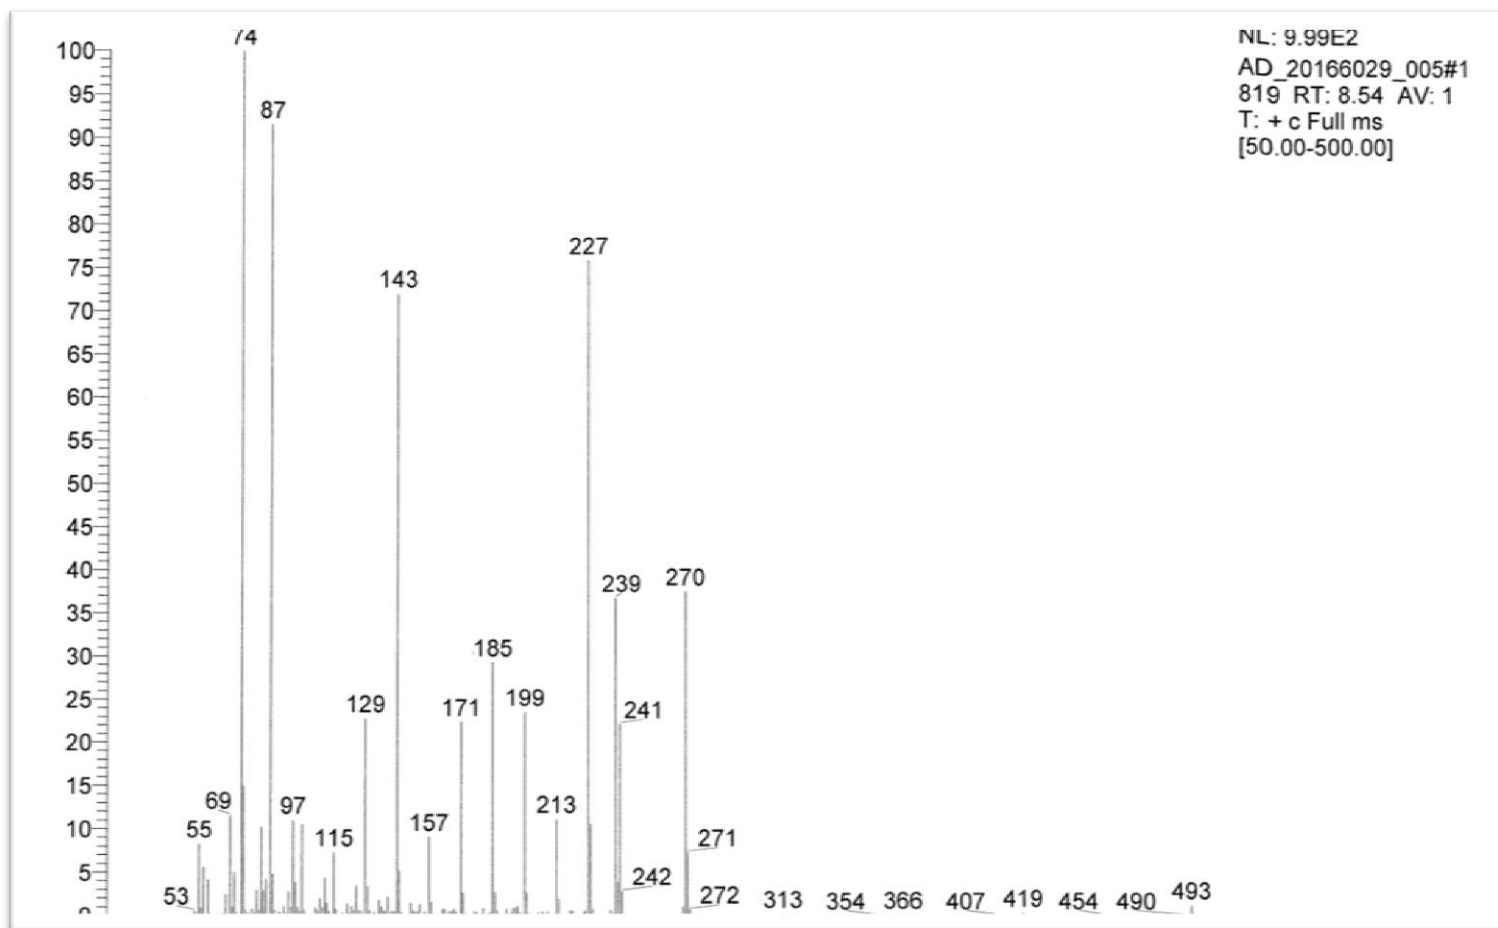



Figure F

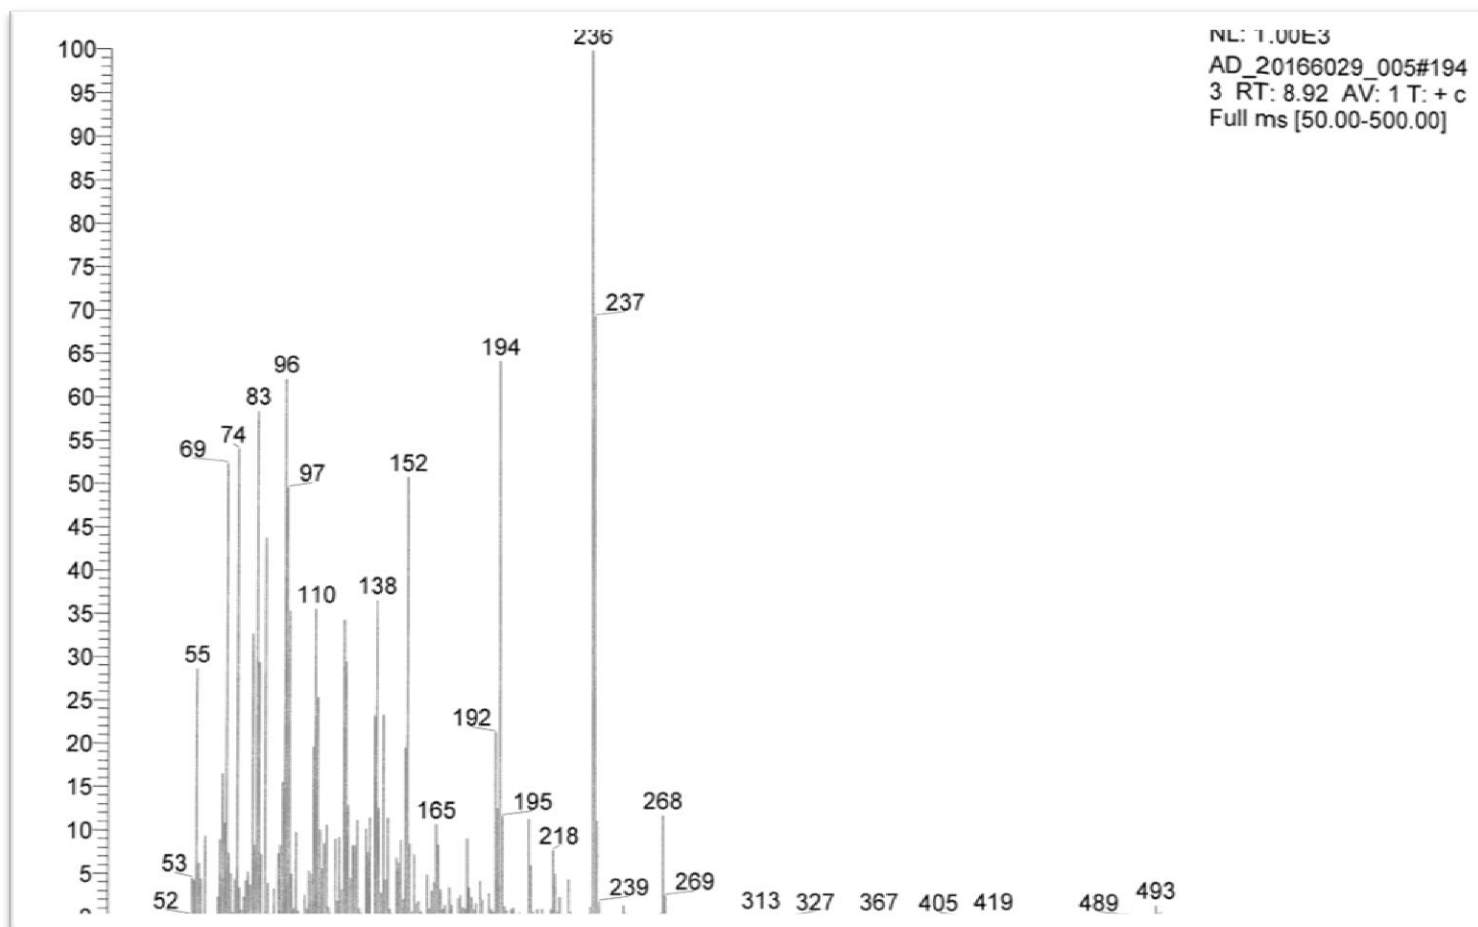



Figure G

Sample Name:  
AD\_113\_140B  
Data Collected on:  
ormuzd-vnmrs500  
Archive directory:  
/home/walkup/vnmrsys/data/amilad  
Sample directory:  
AD\_113\_140B\_20160622\_01  
FidFile: AD\_113\_140B\_PROTON\_01

Pulse Sequence: PROTON (s2pul)  
Solvent: cdcl3  
Data collected on: Jun 22 2016

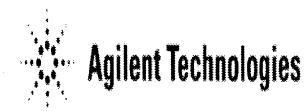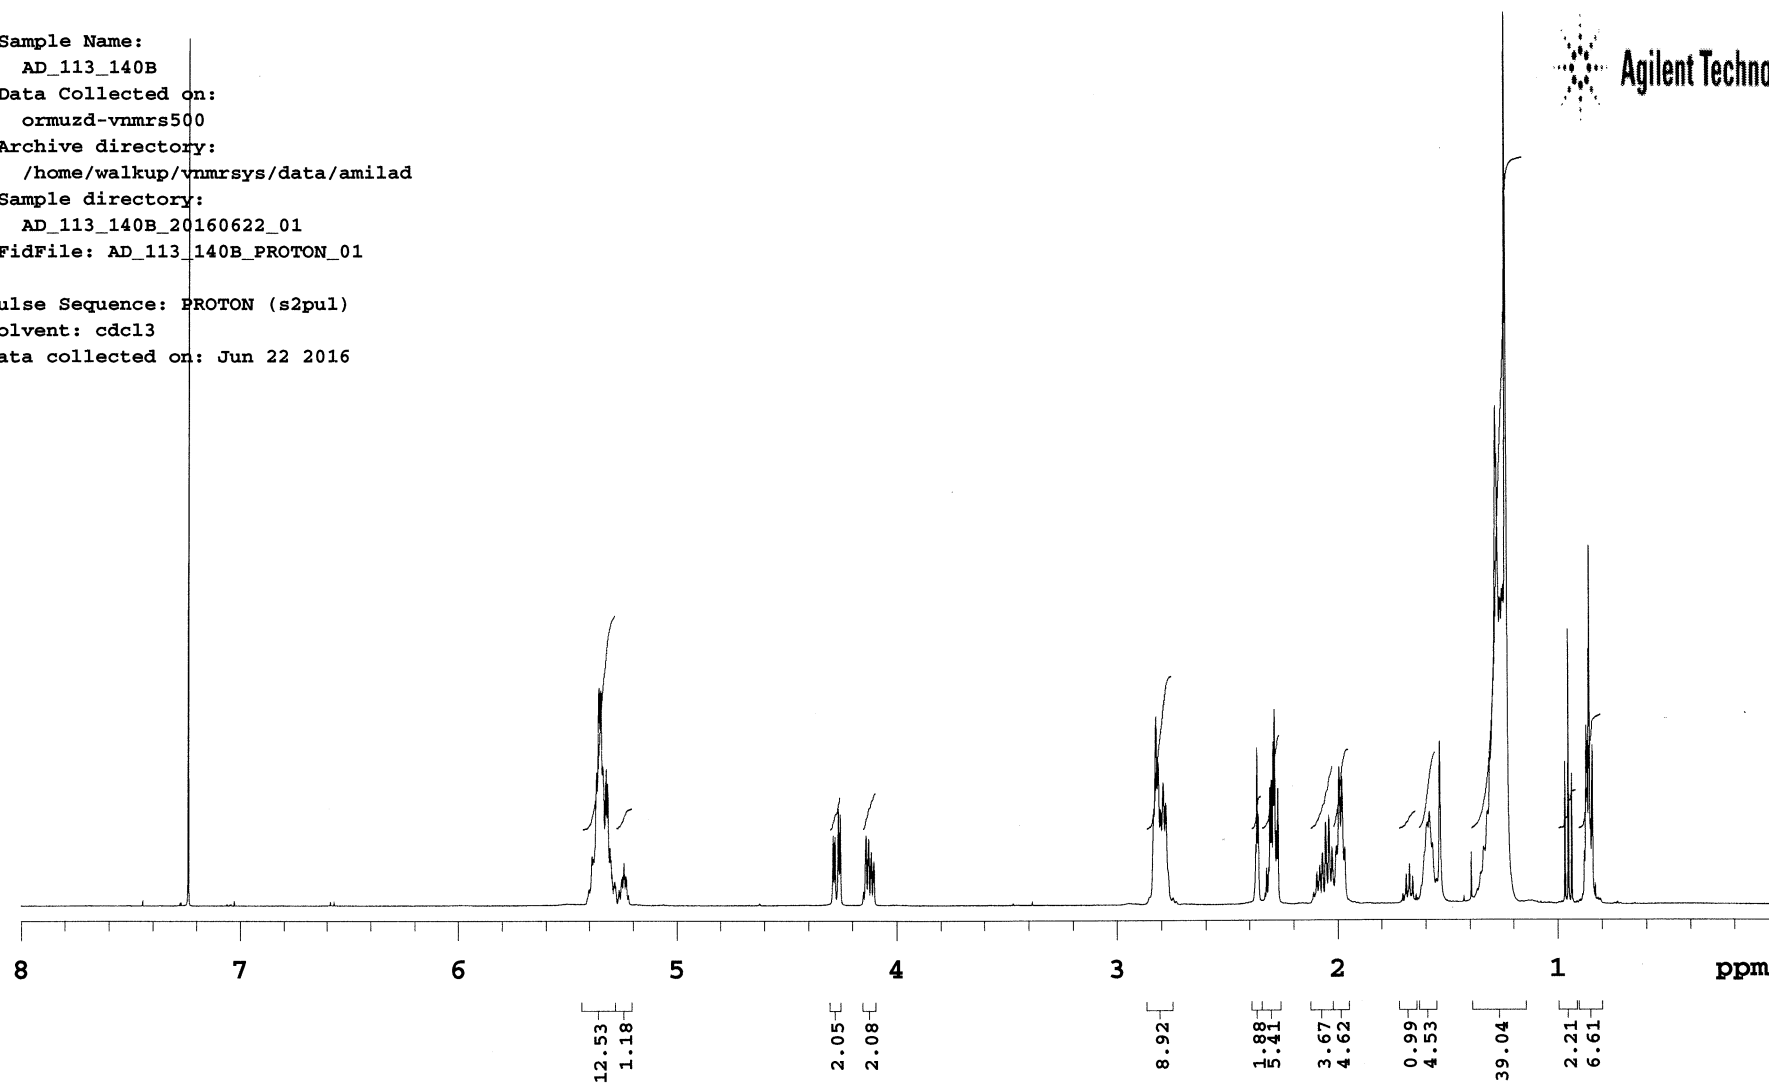



Figure H

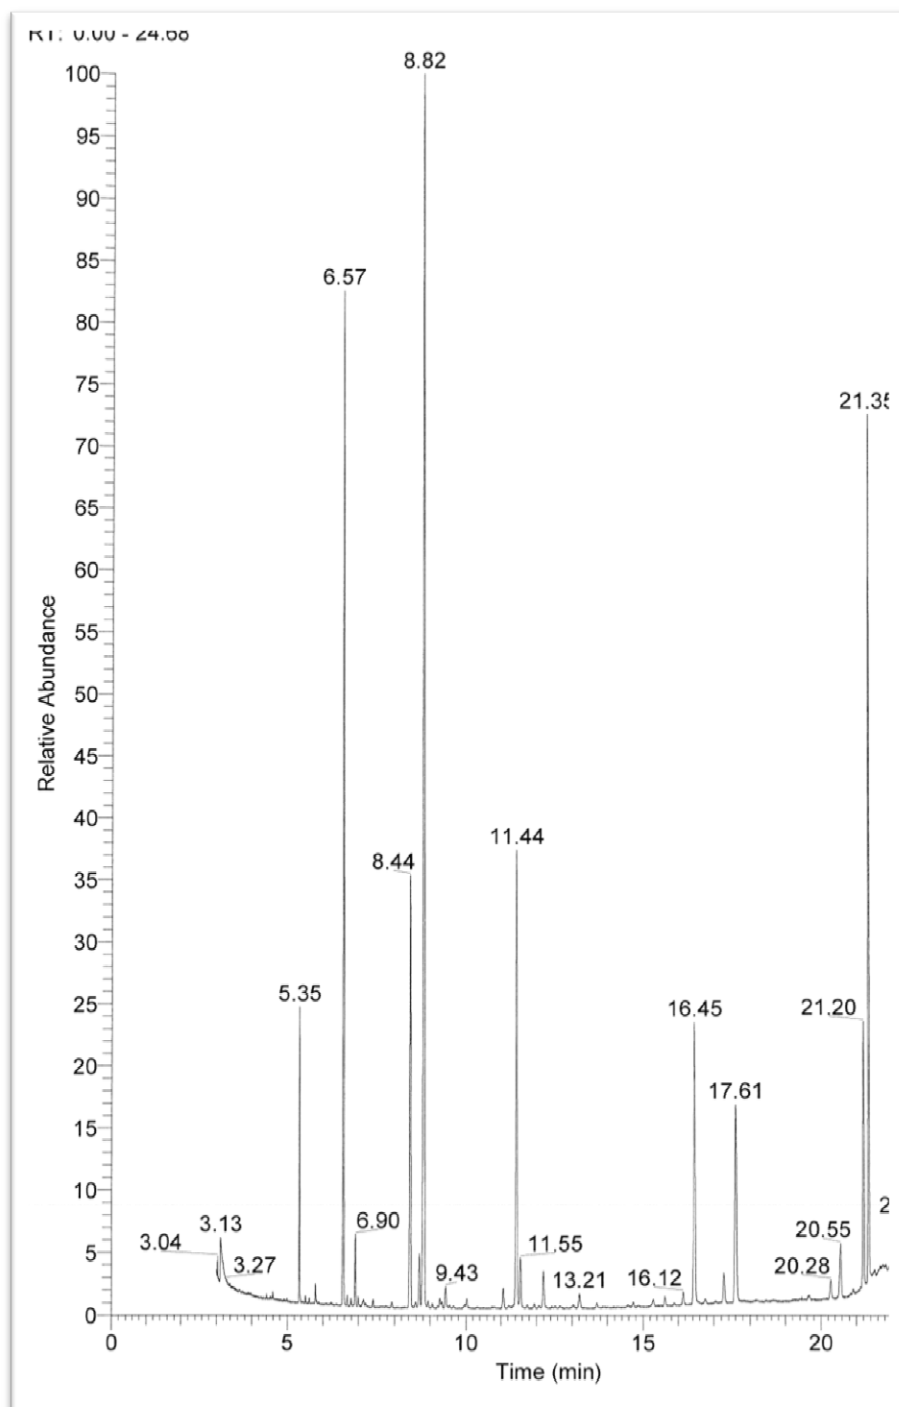



Figure I

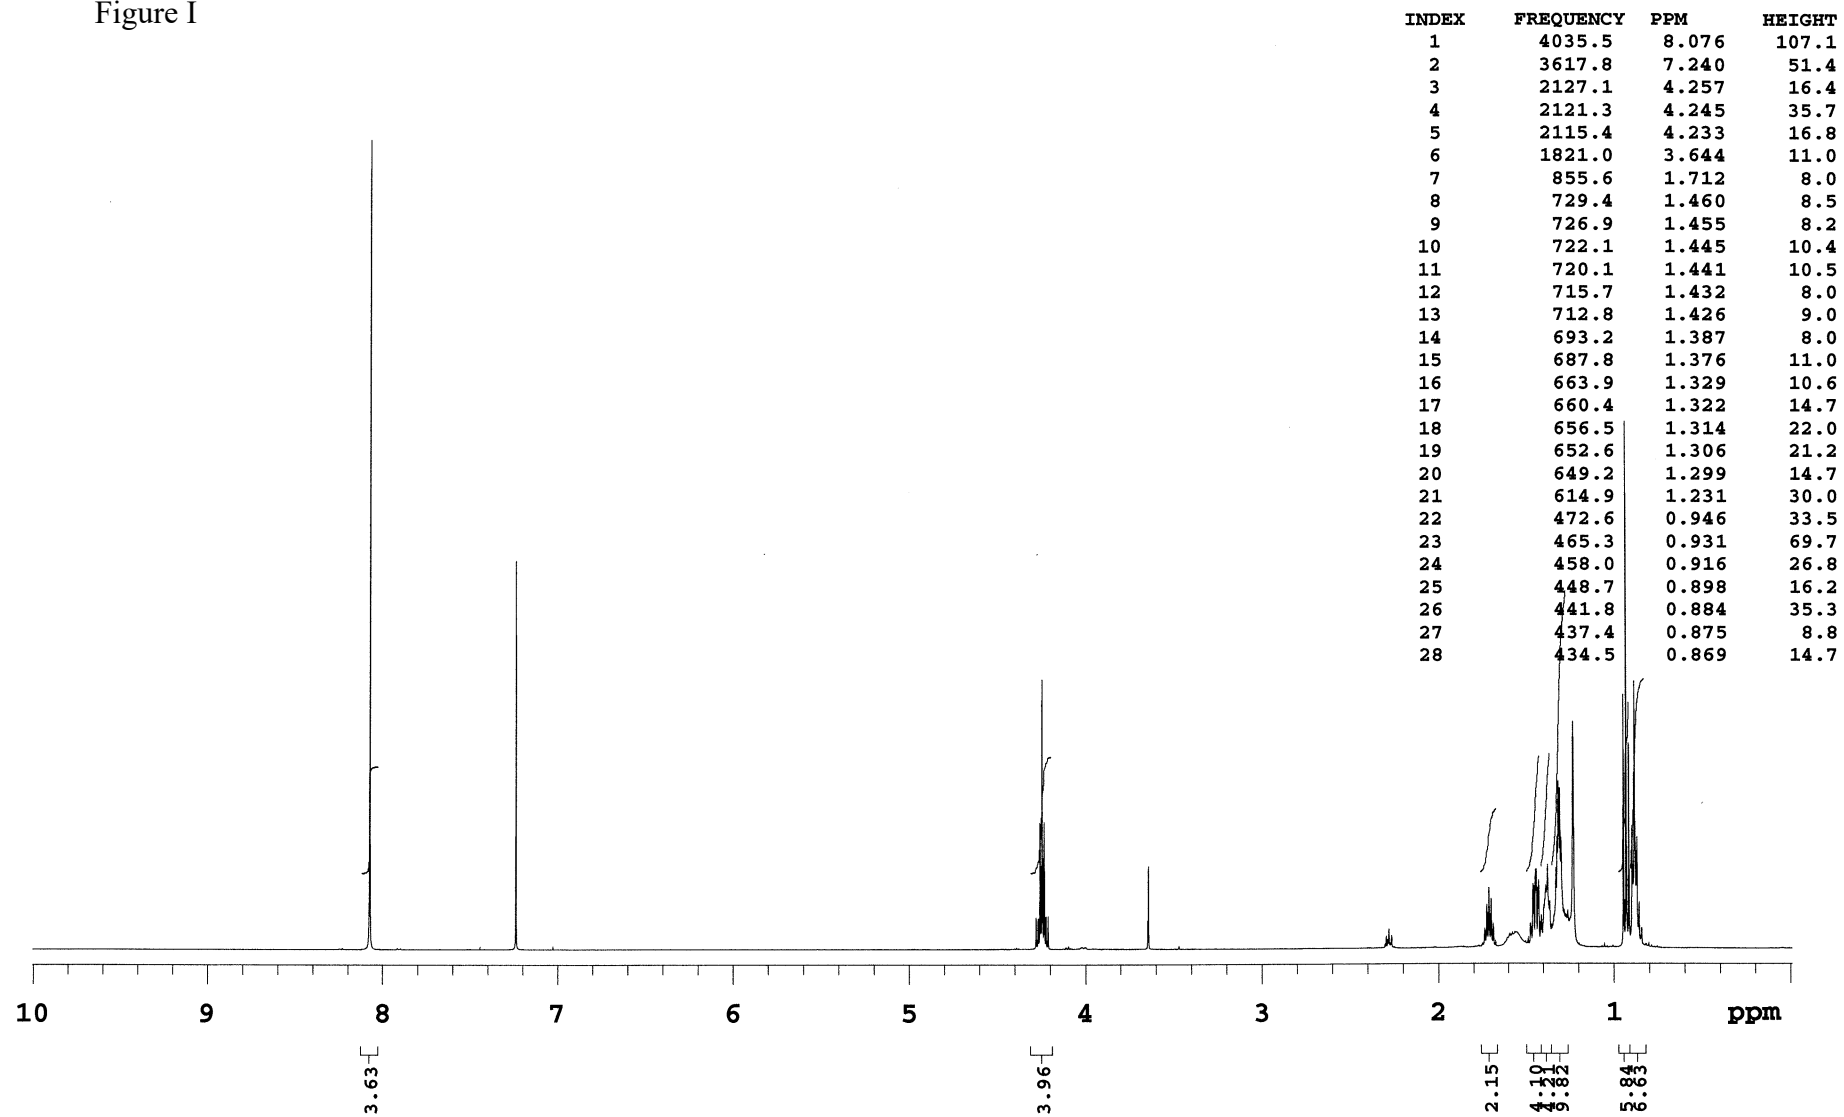



Figure J

Sample Name:  
AD\_120\_4A  
Data Collected on:  
ormuzd-vnmrs500  
Archive directory:  
/home/walkup/vnmrsys/data/amilad  
Sample directory:  
AD\_120\_4A\_20160719\_02  
FidFile: AD\_120\_4A\_CARBON\_01

Pulse Sequence: CARBON (s2pul)  
Solvent: cdc13  
Data collected on: Jul 19 2016

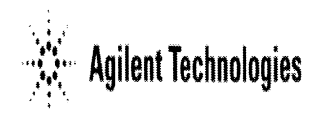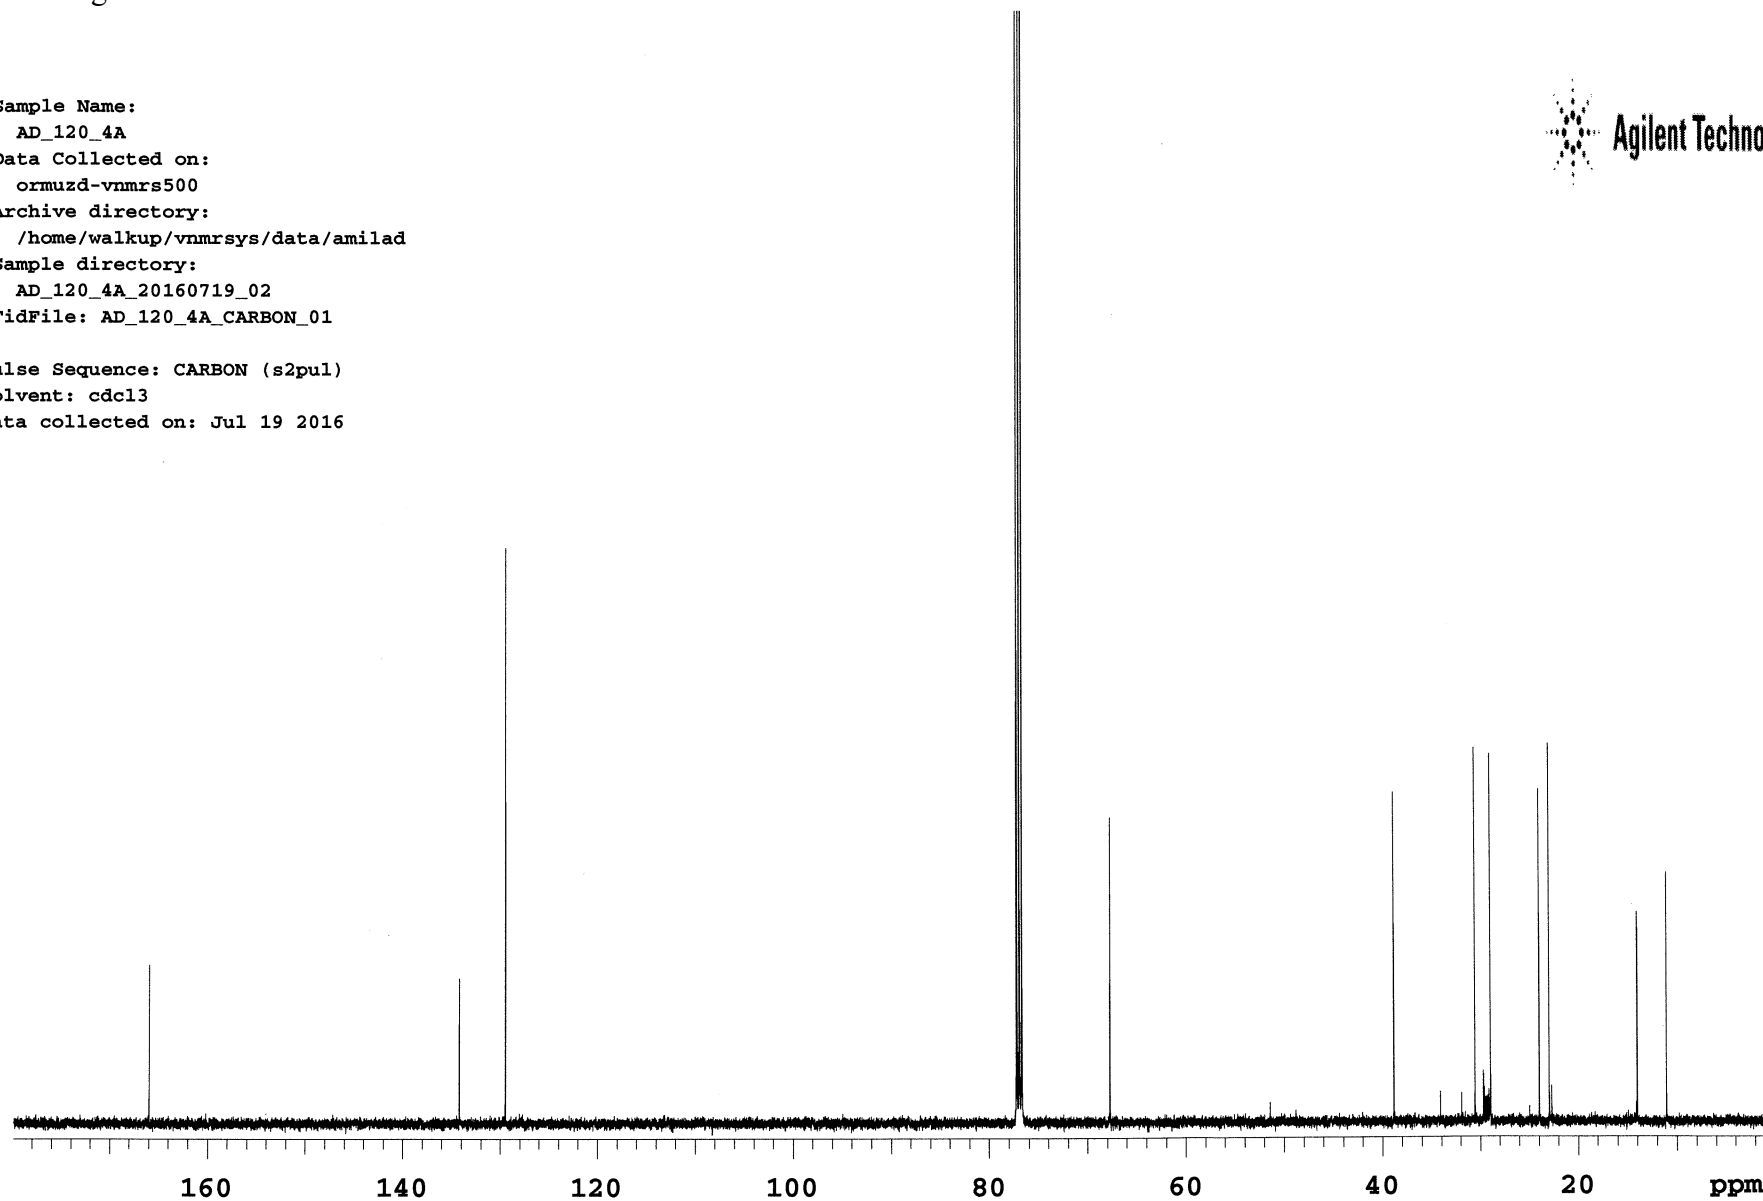



Figure K

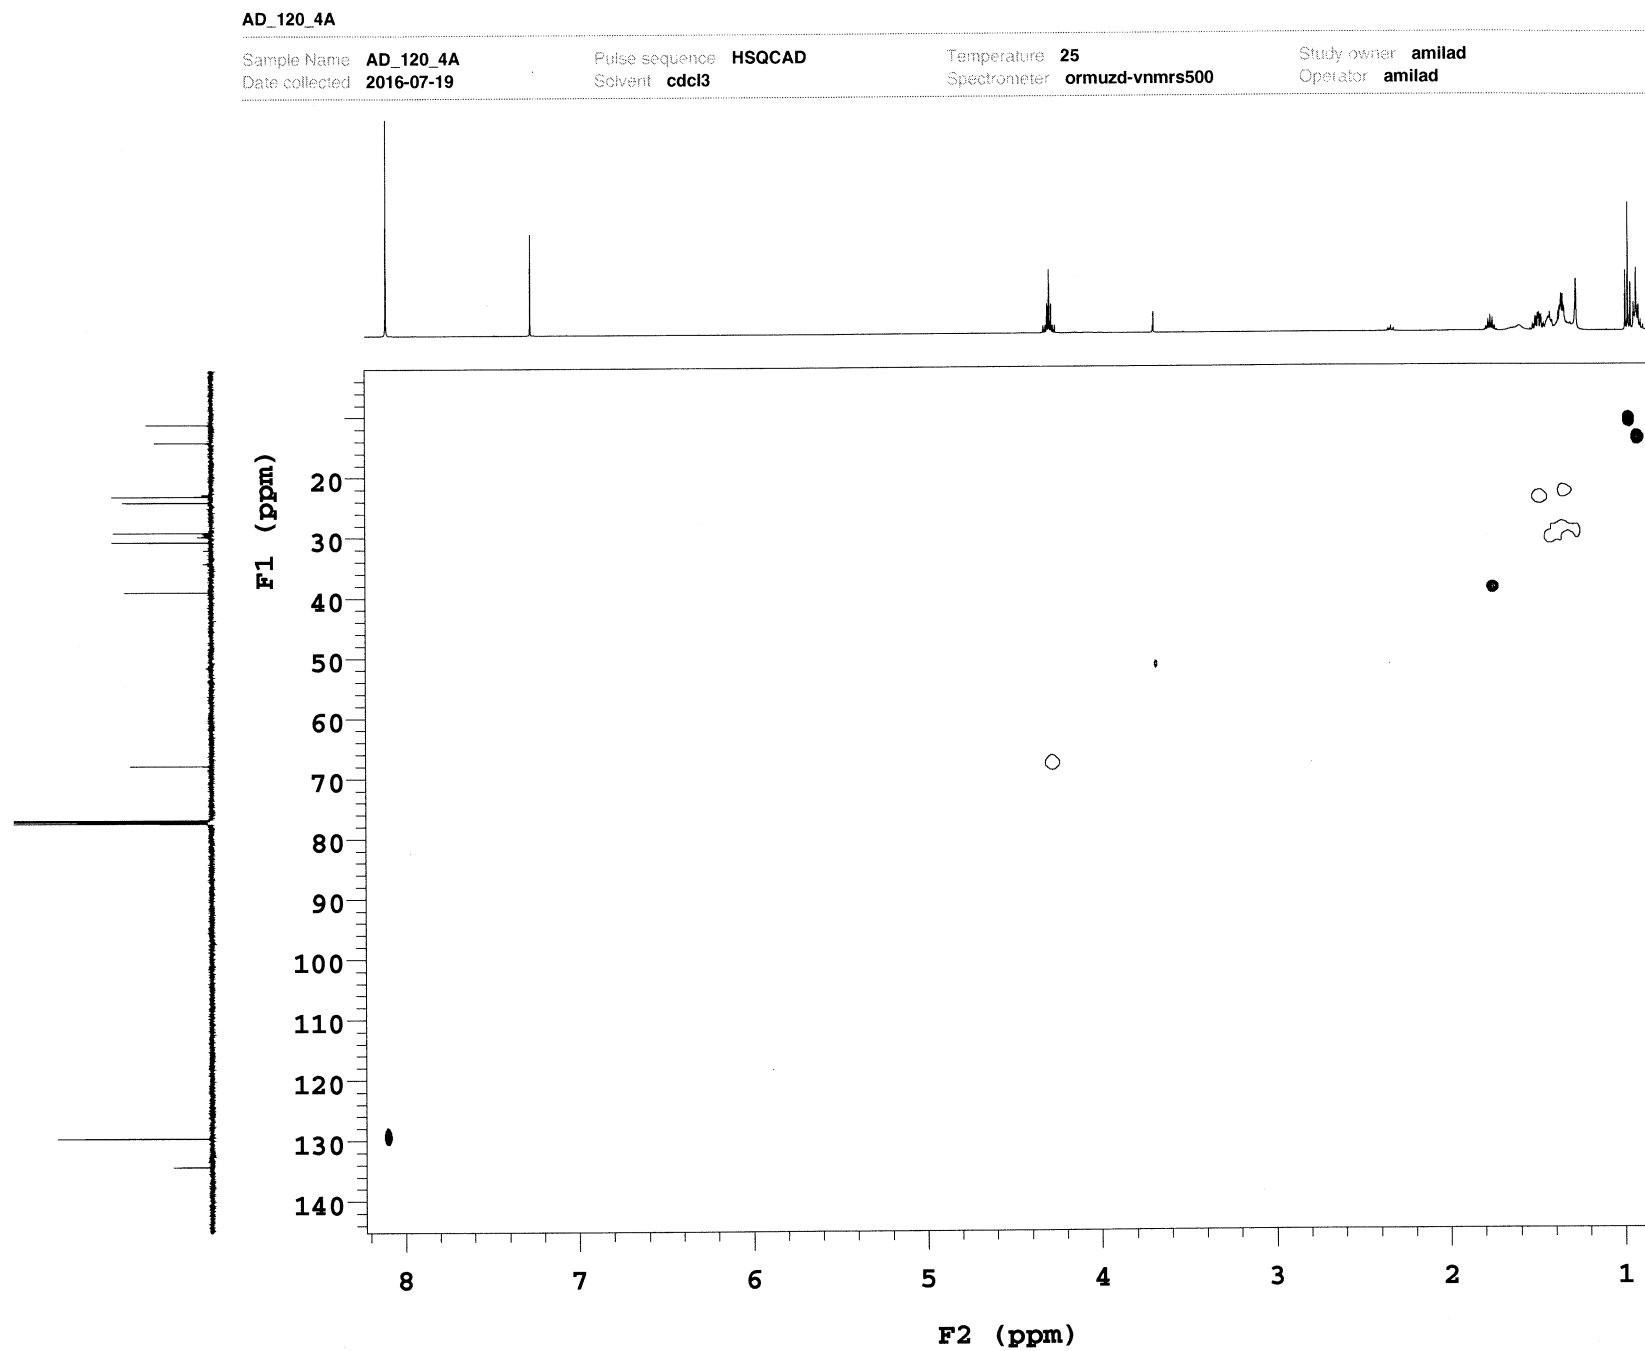



Figure L

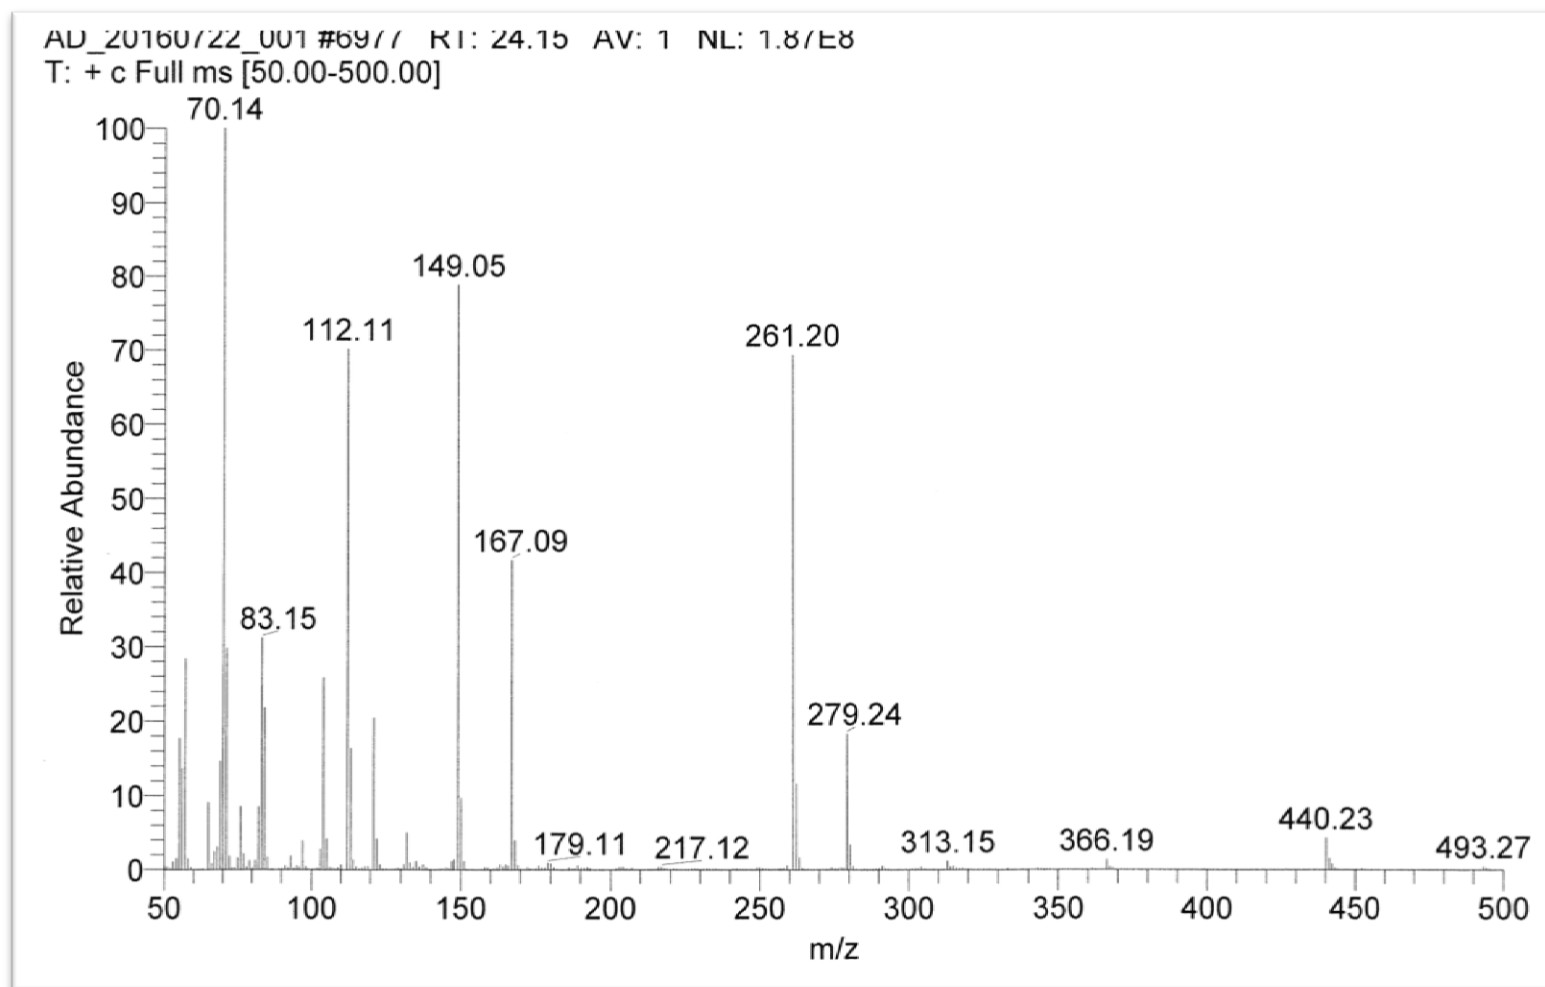



Figure M

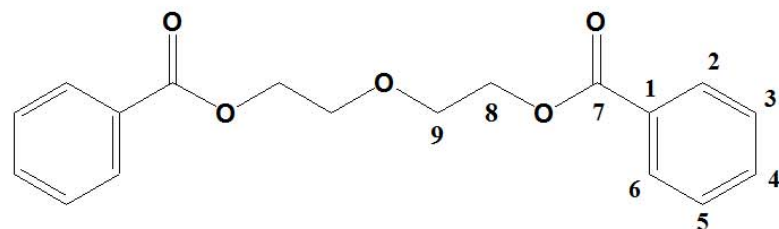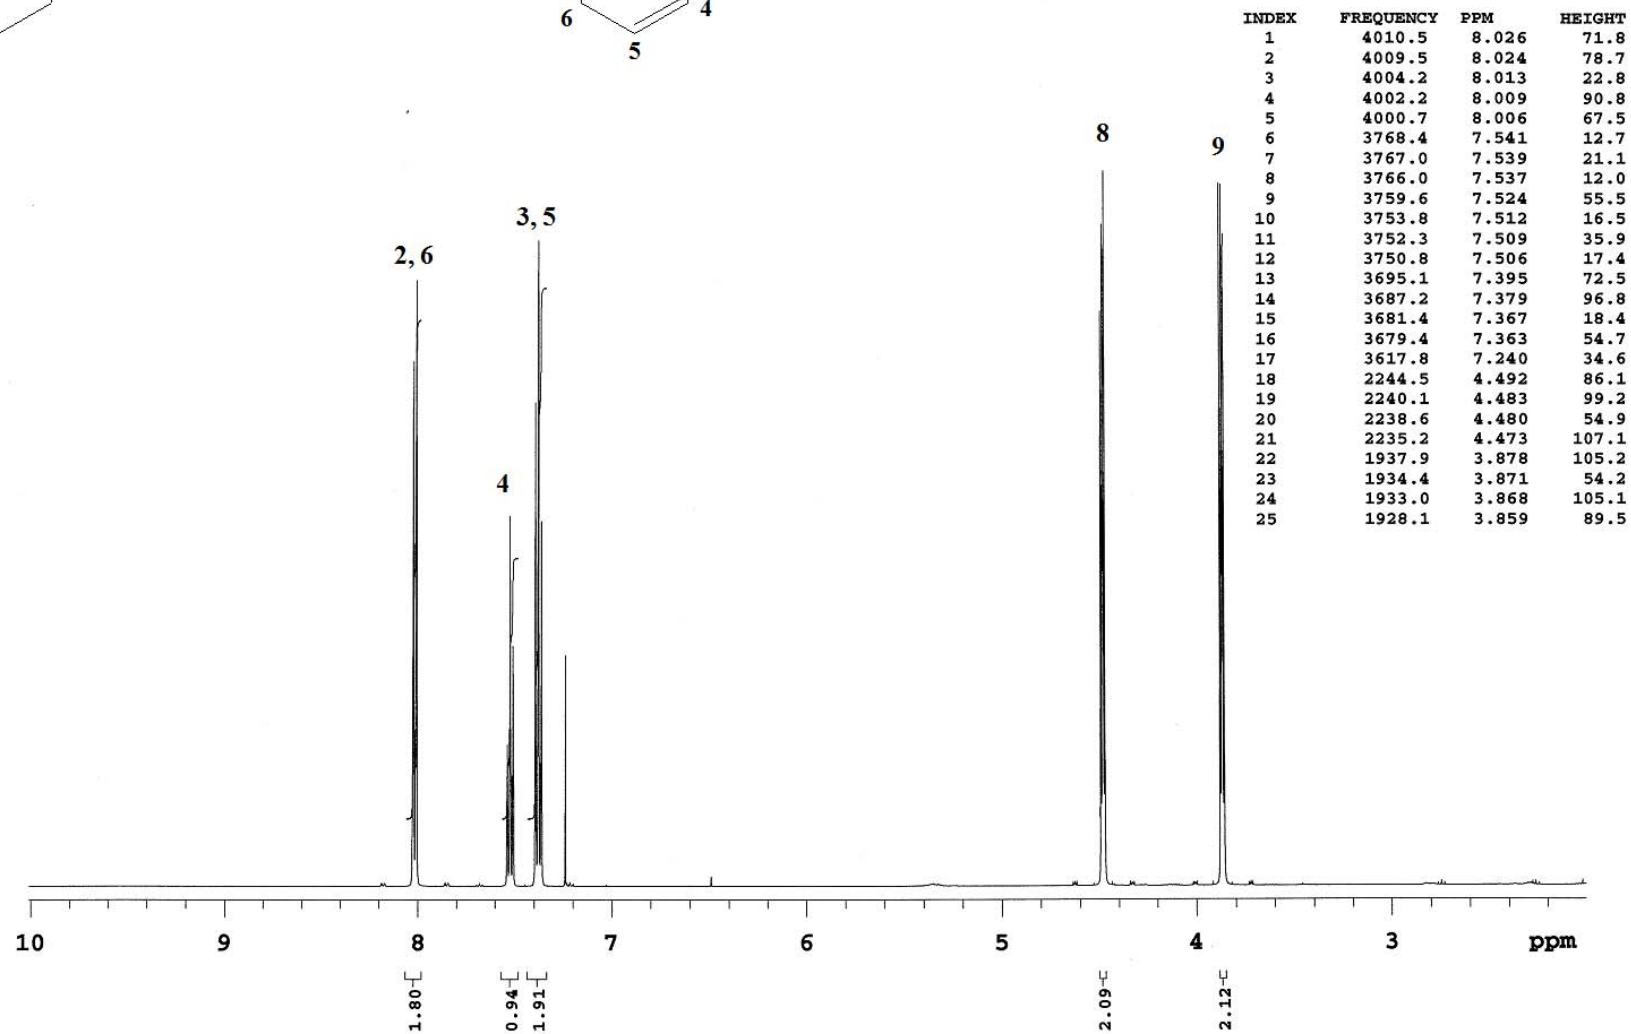



Figure N

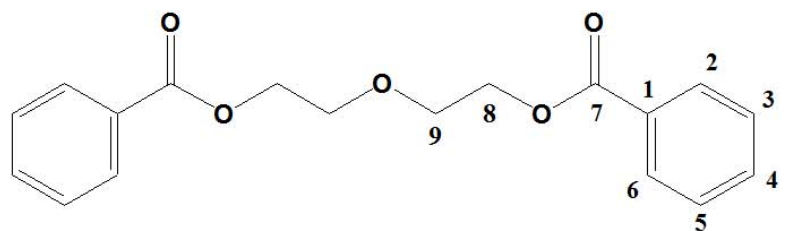

| INDEX | FREQUENCY | PPM     | HEIGHT |
|-------|-----------|---------|--------|
| 1     | 20921.6   | 166.509 | 14.5   |
| 2     | 16706.4   | 132.961 | 61.3   |
| 3     | 16329.7   | 129.963 | 19.0   |
| 4     | 16287.7   | 129.629 | 116.3  |
| 5     | 16120.8   | 128.301 | 117.9  |
| 6     | 9706.4    | 77.250  | 38.5   |
| 7     | 9674.9    | 77.000  | 34.4   |
| 8     | 9642.5    | 76.742  | 39.1   |
| 9     | 8690.8    | 69.167  | 35.7   |
| 10    | 8037.5    | 63.968  | 56.3   |

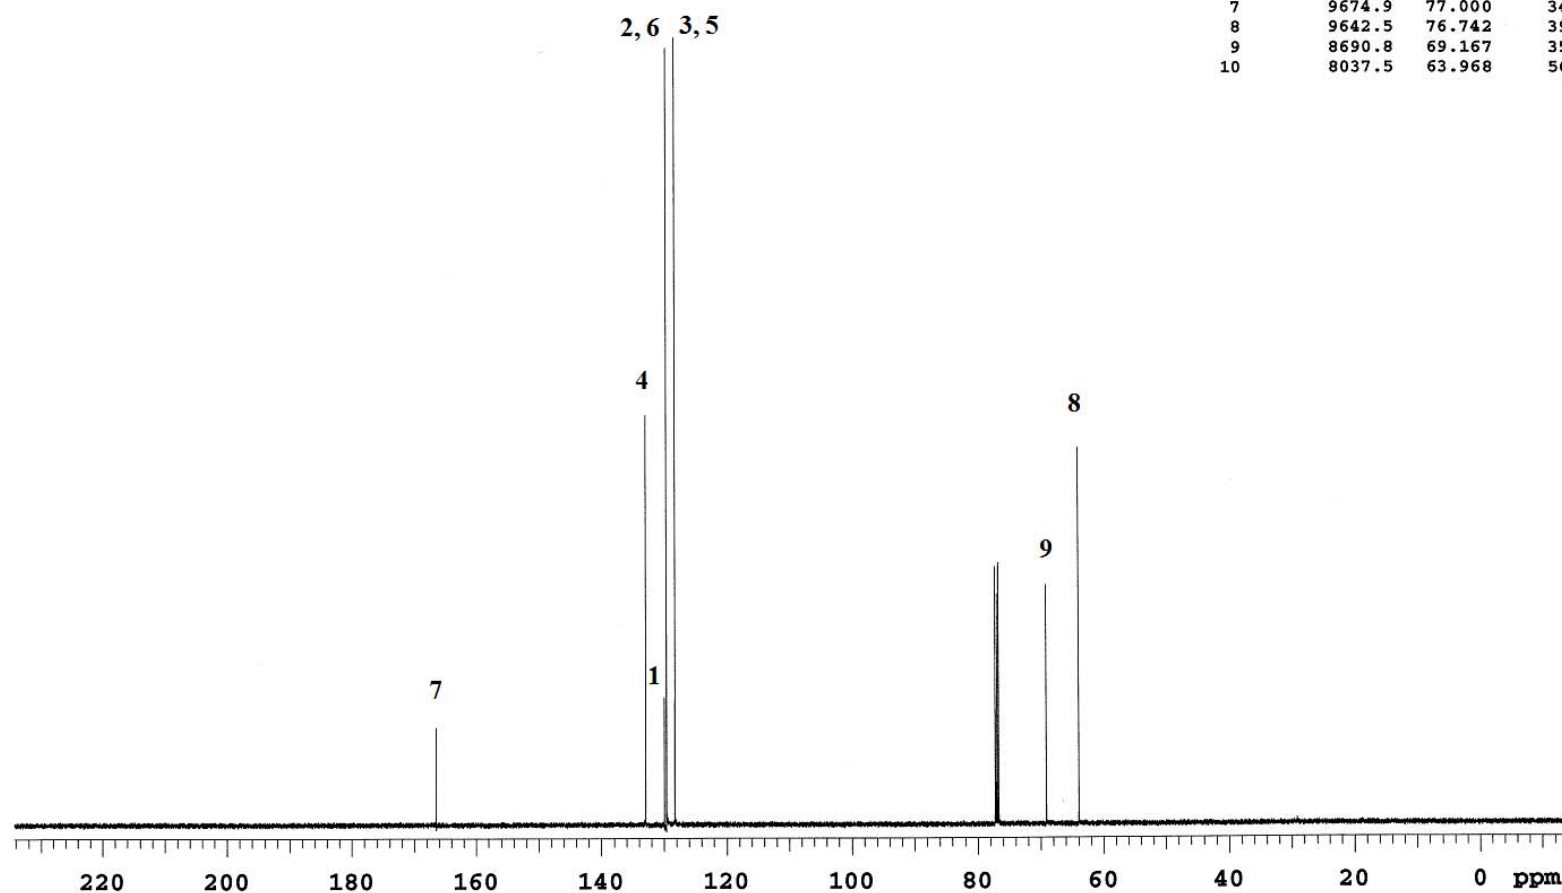



Figure O

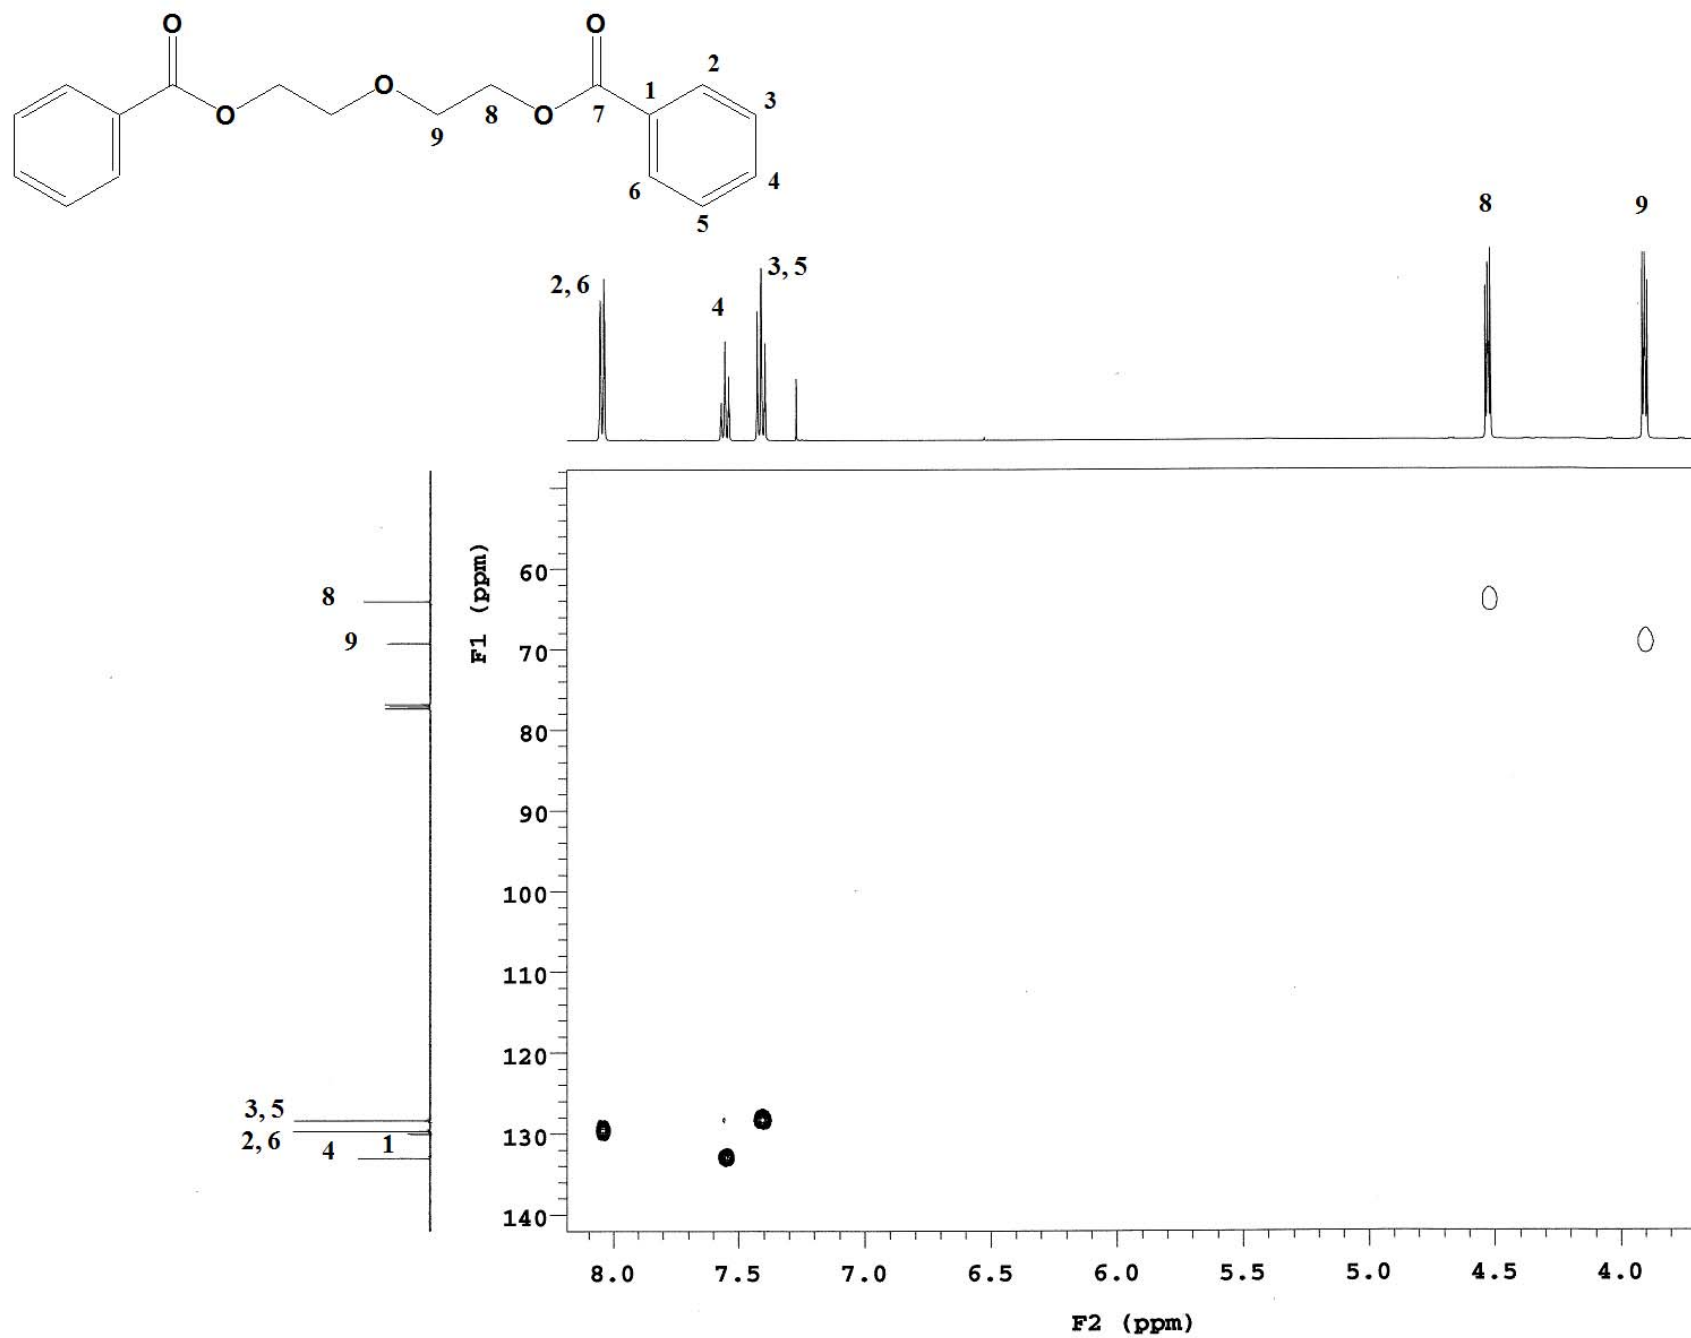



Figure P

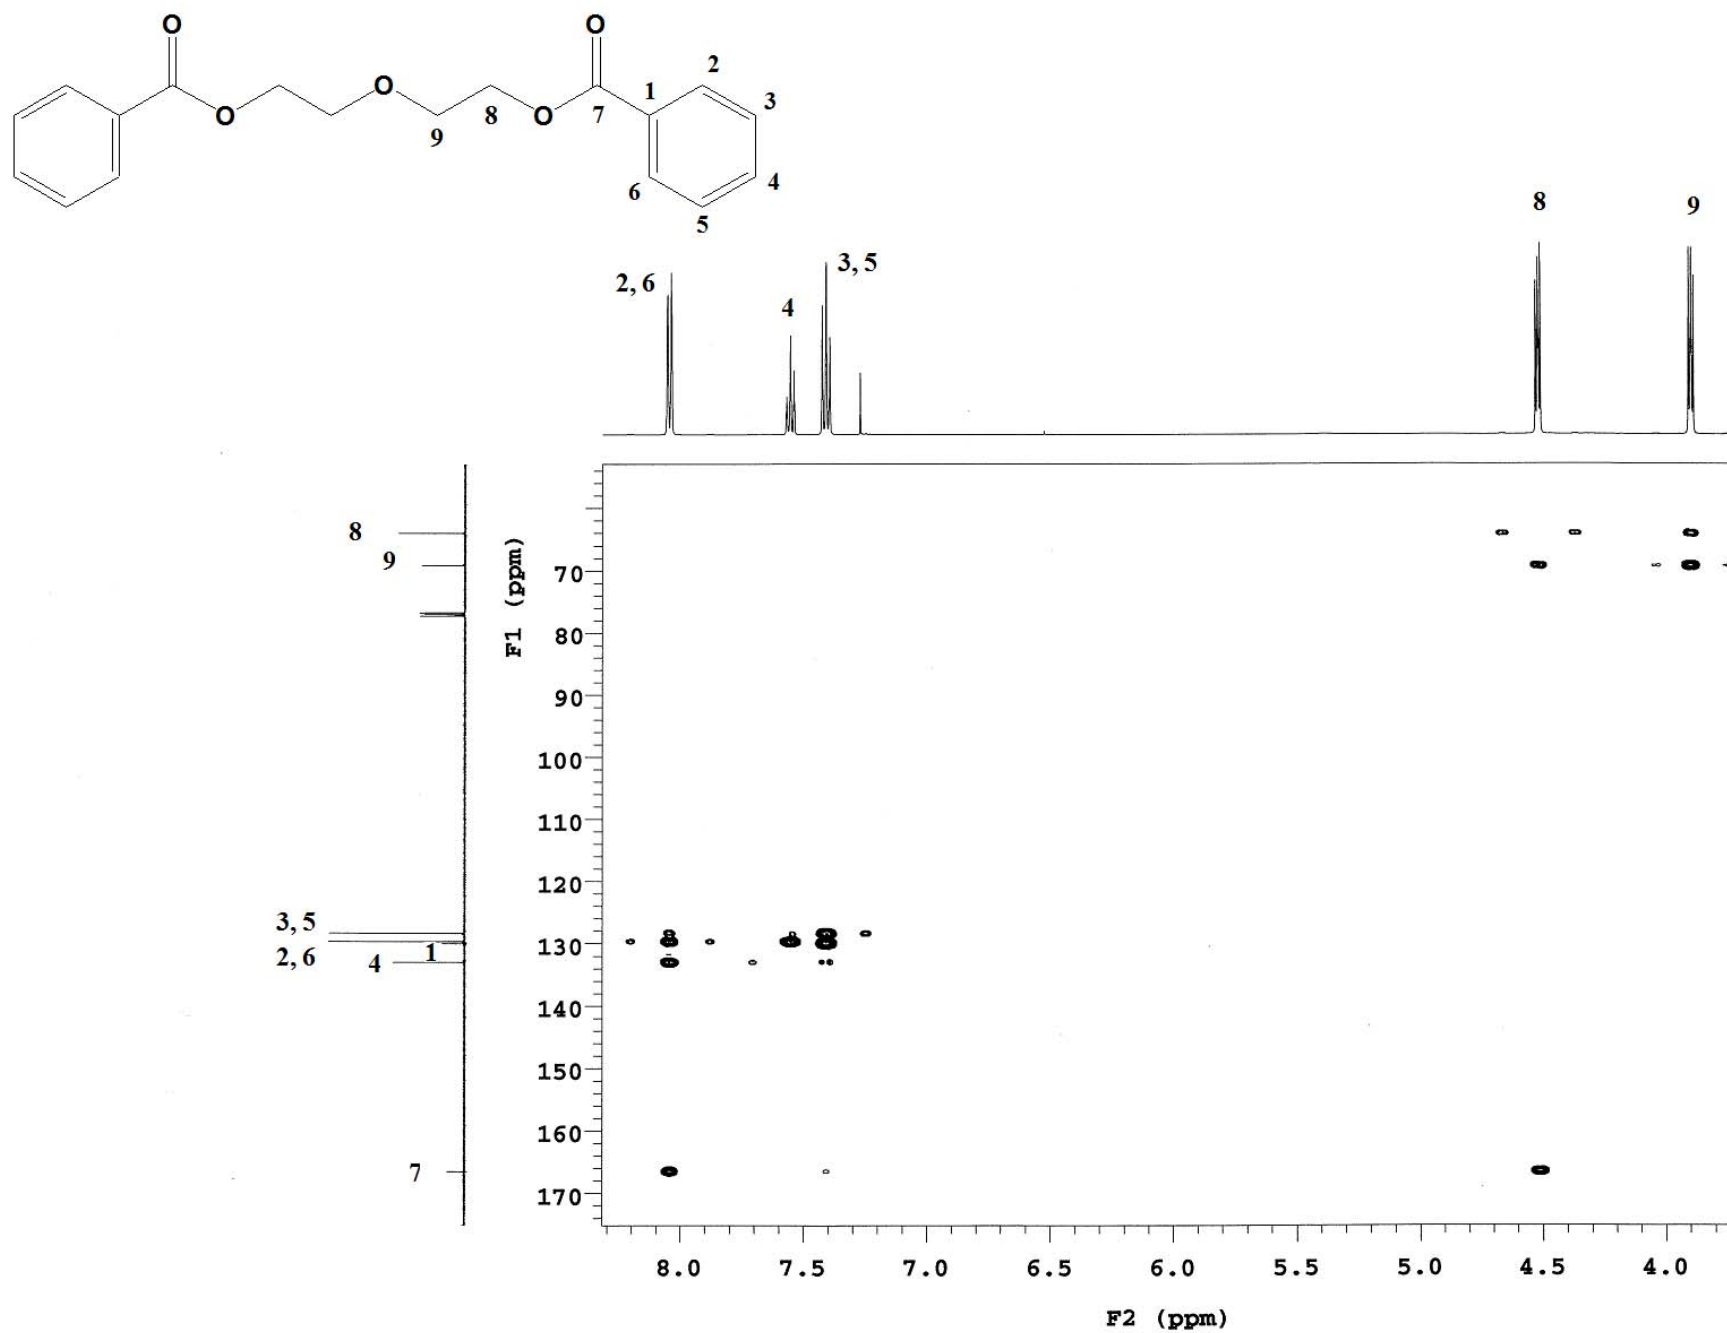



Figure Q

AD/113/143D

AD\_20160527\_143D\_2 768 (8.707)

TOF MS EI+  
4.86e5

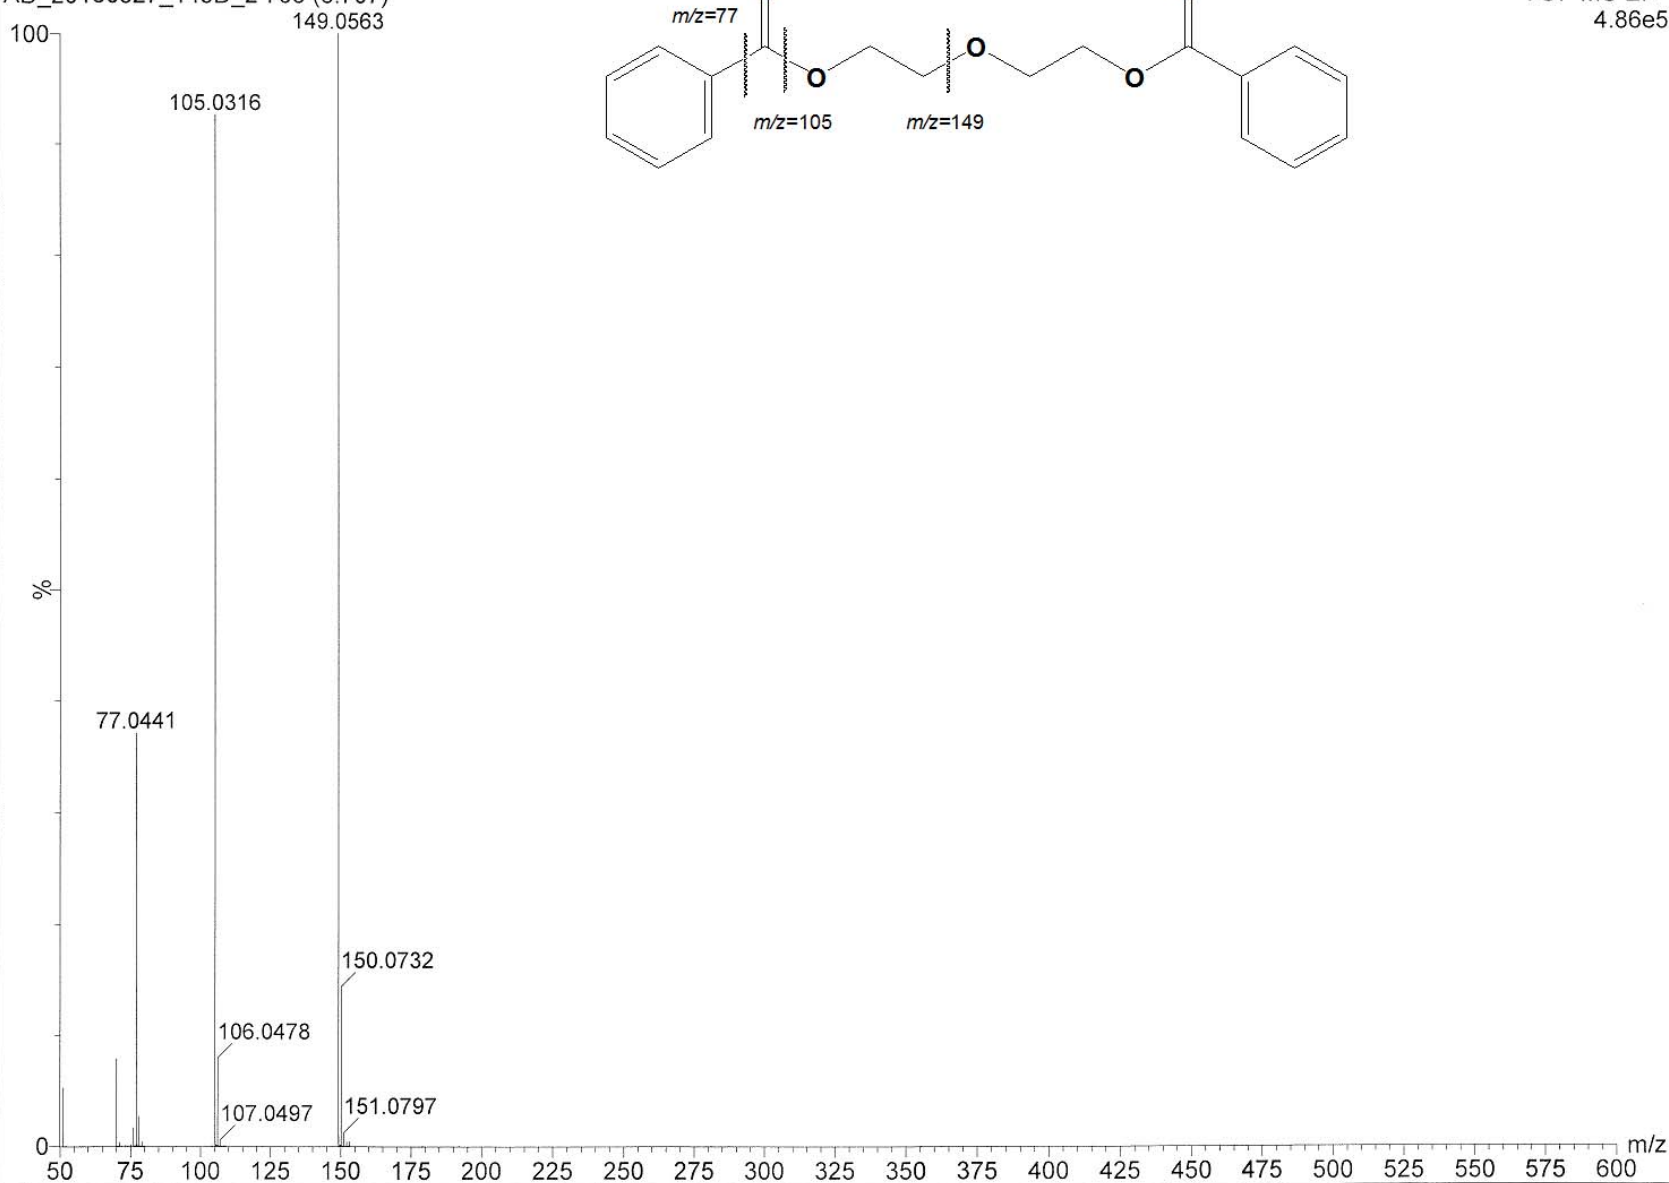



Figure R

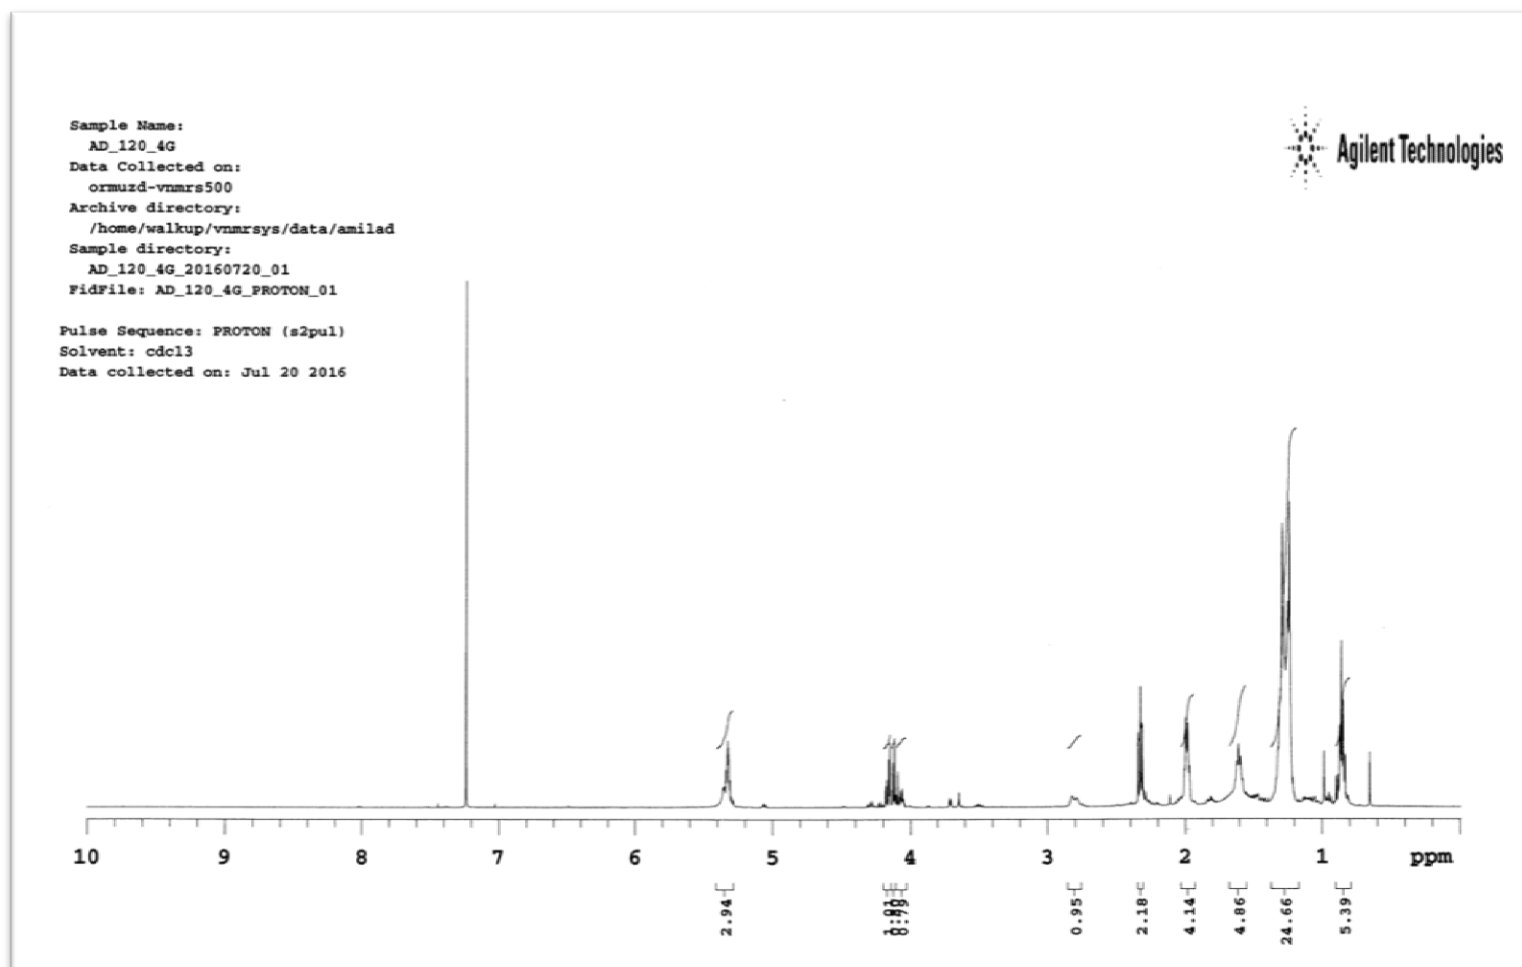



Figure S

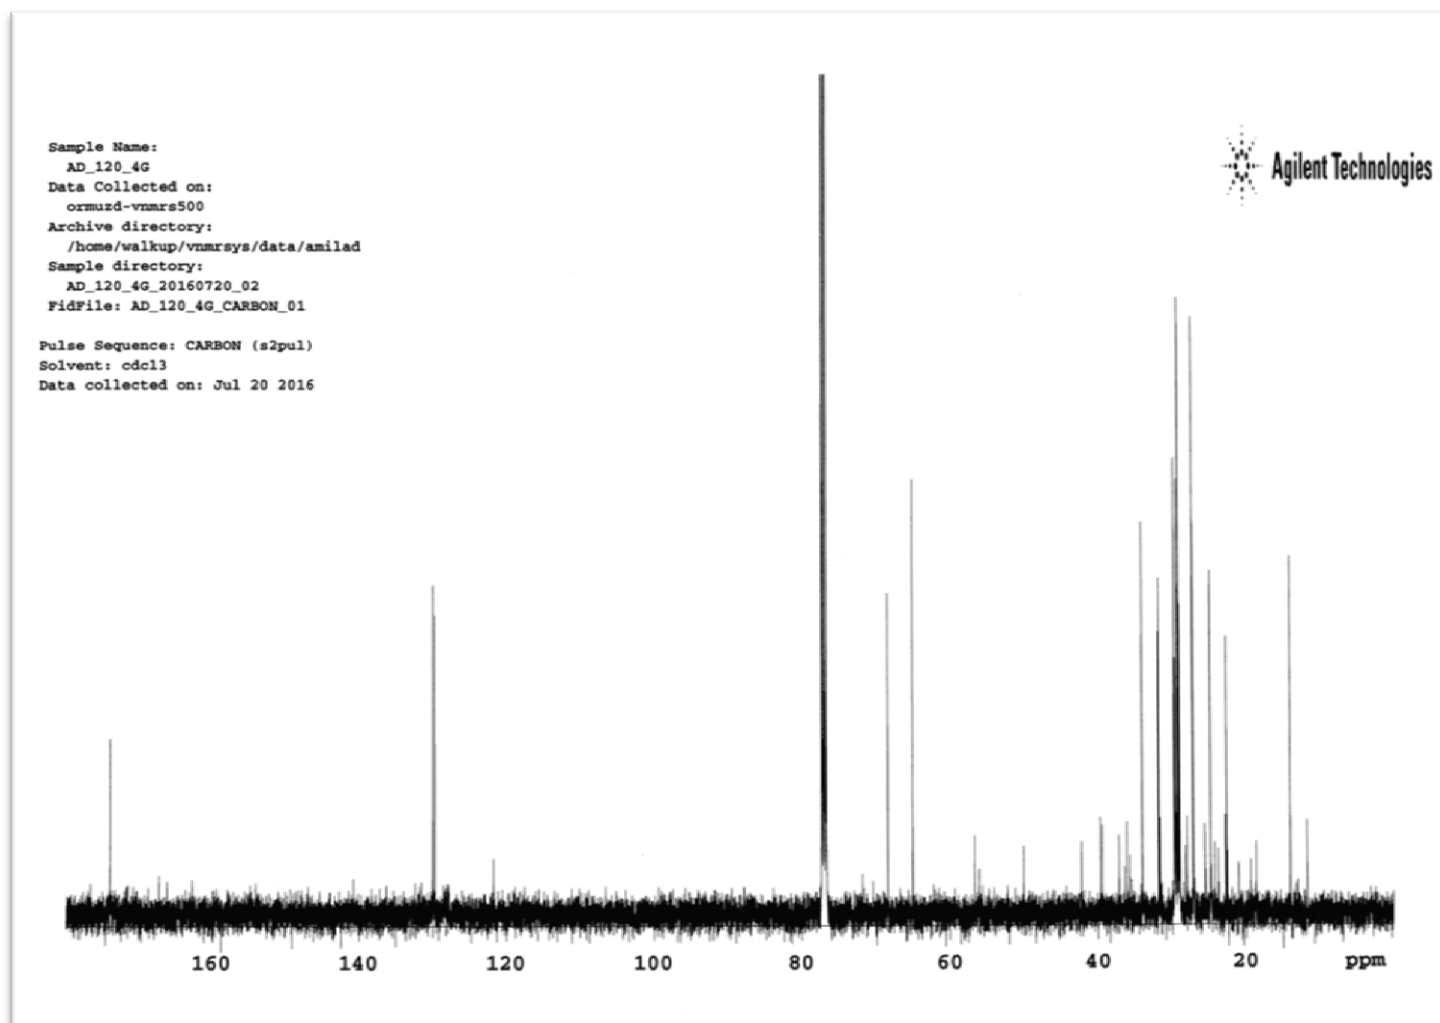



Figure T

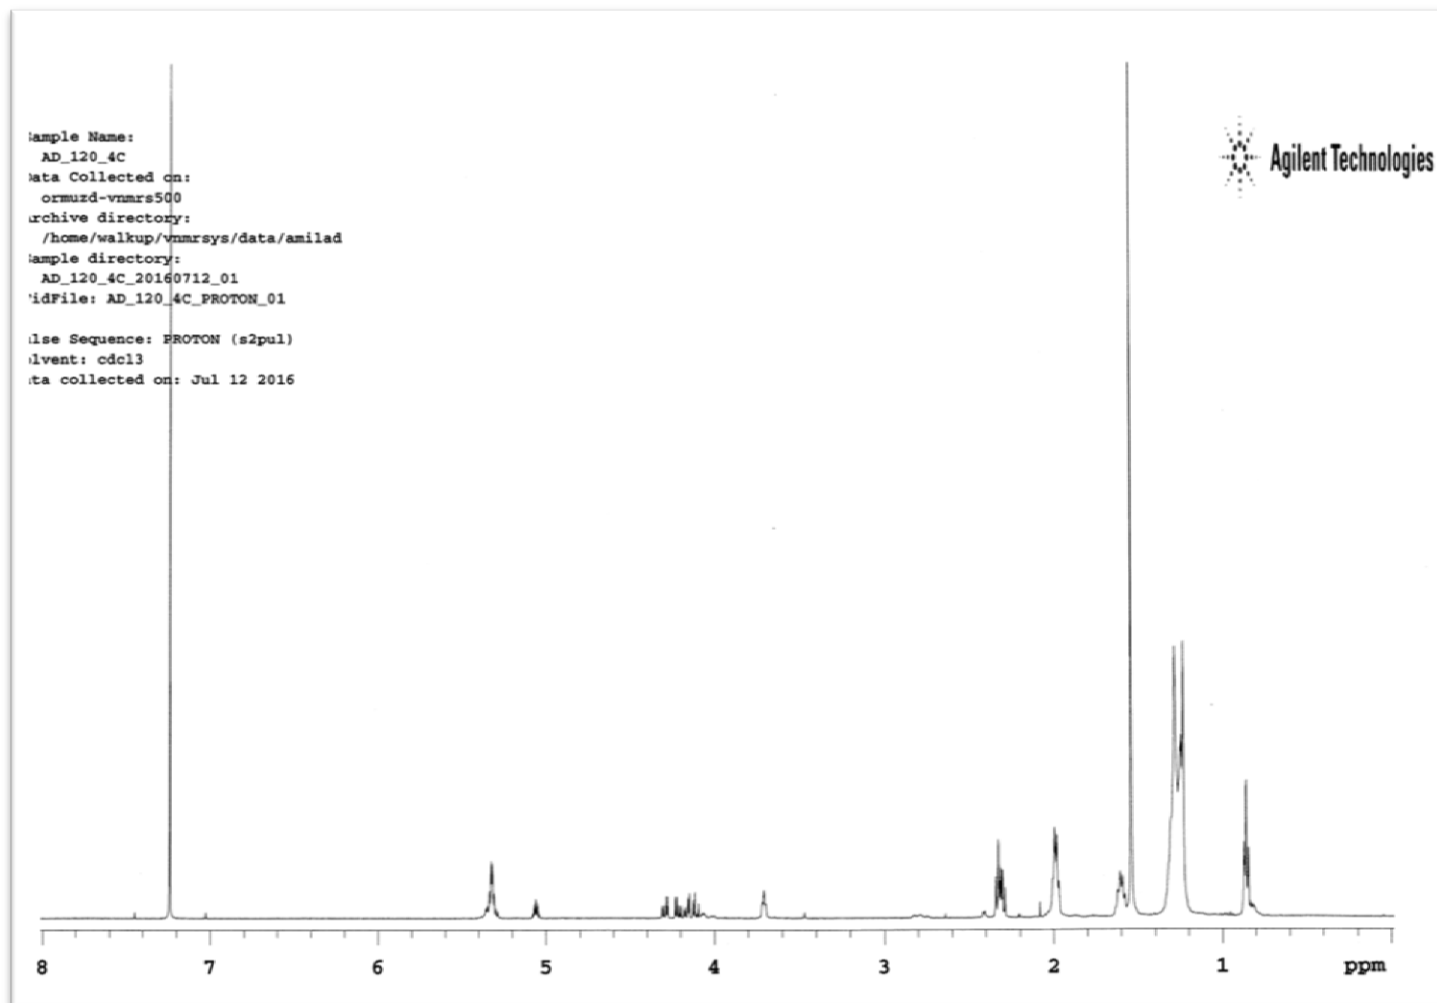



Figure U

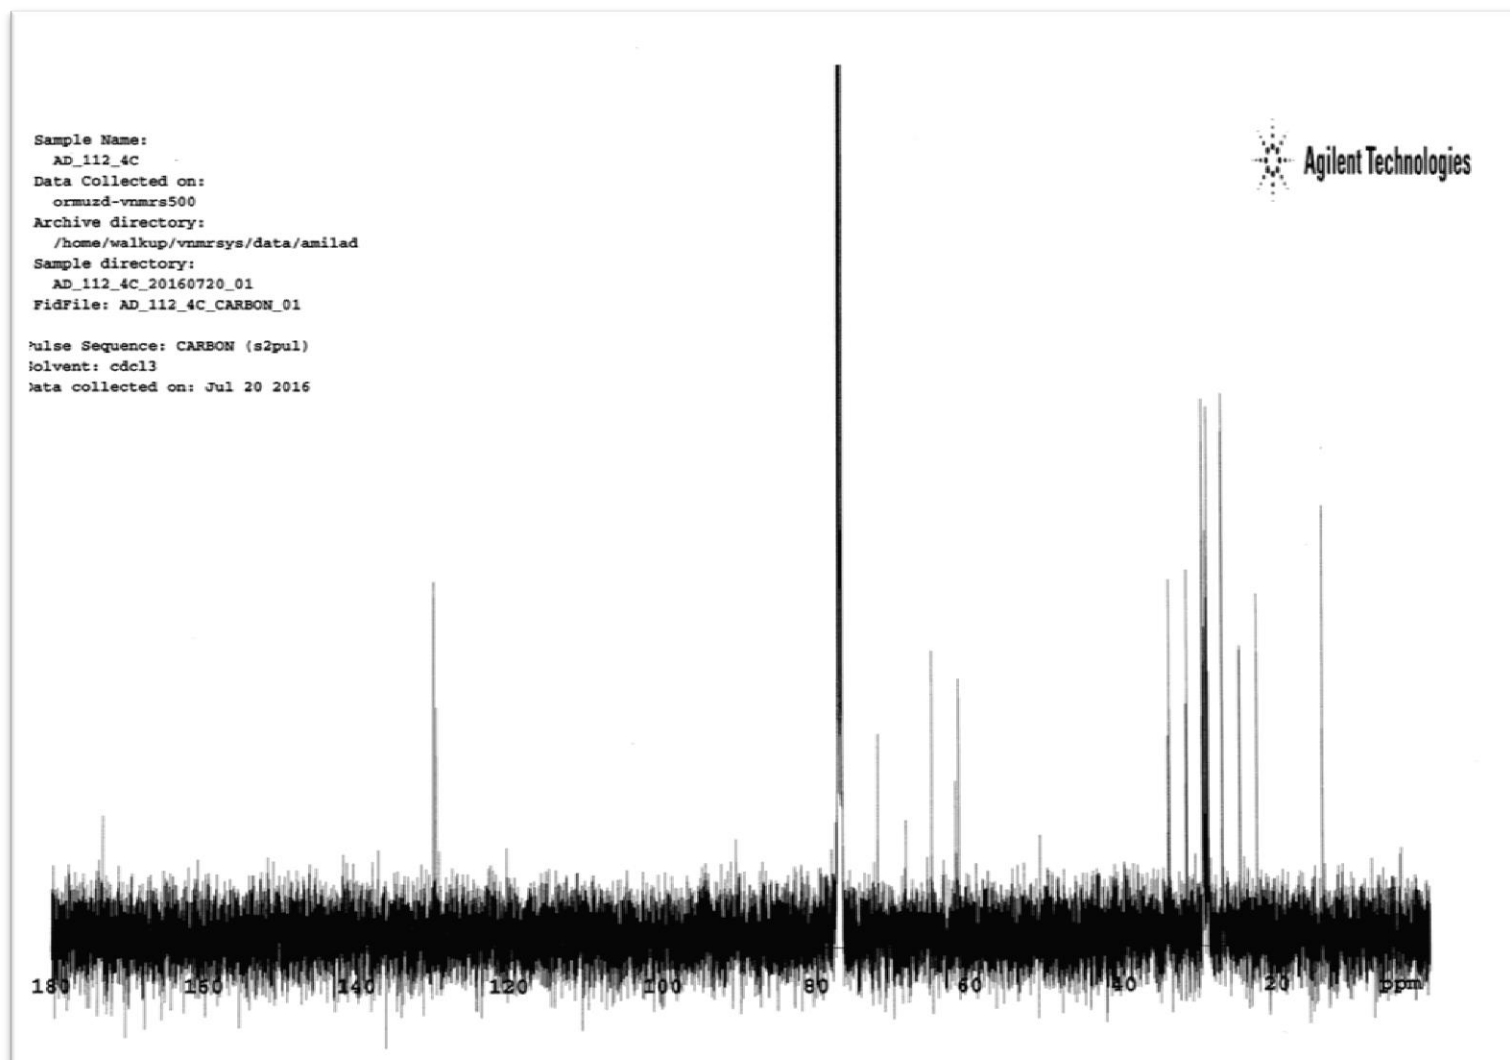



Figure V

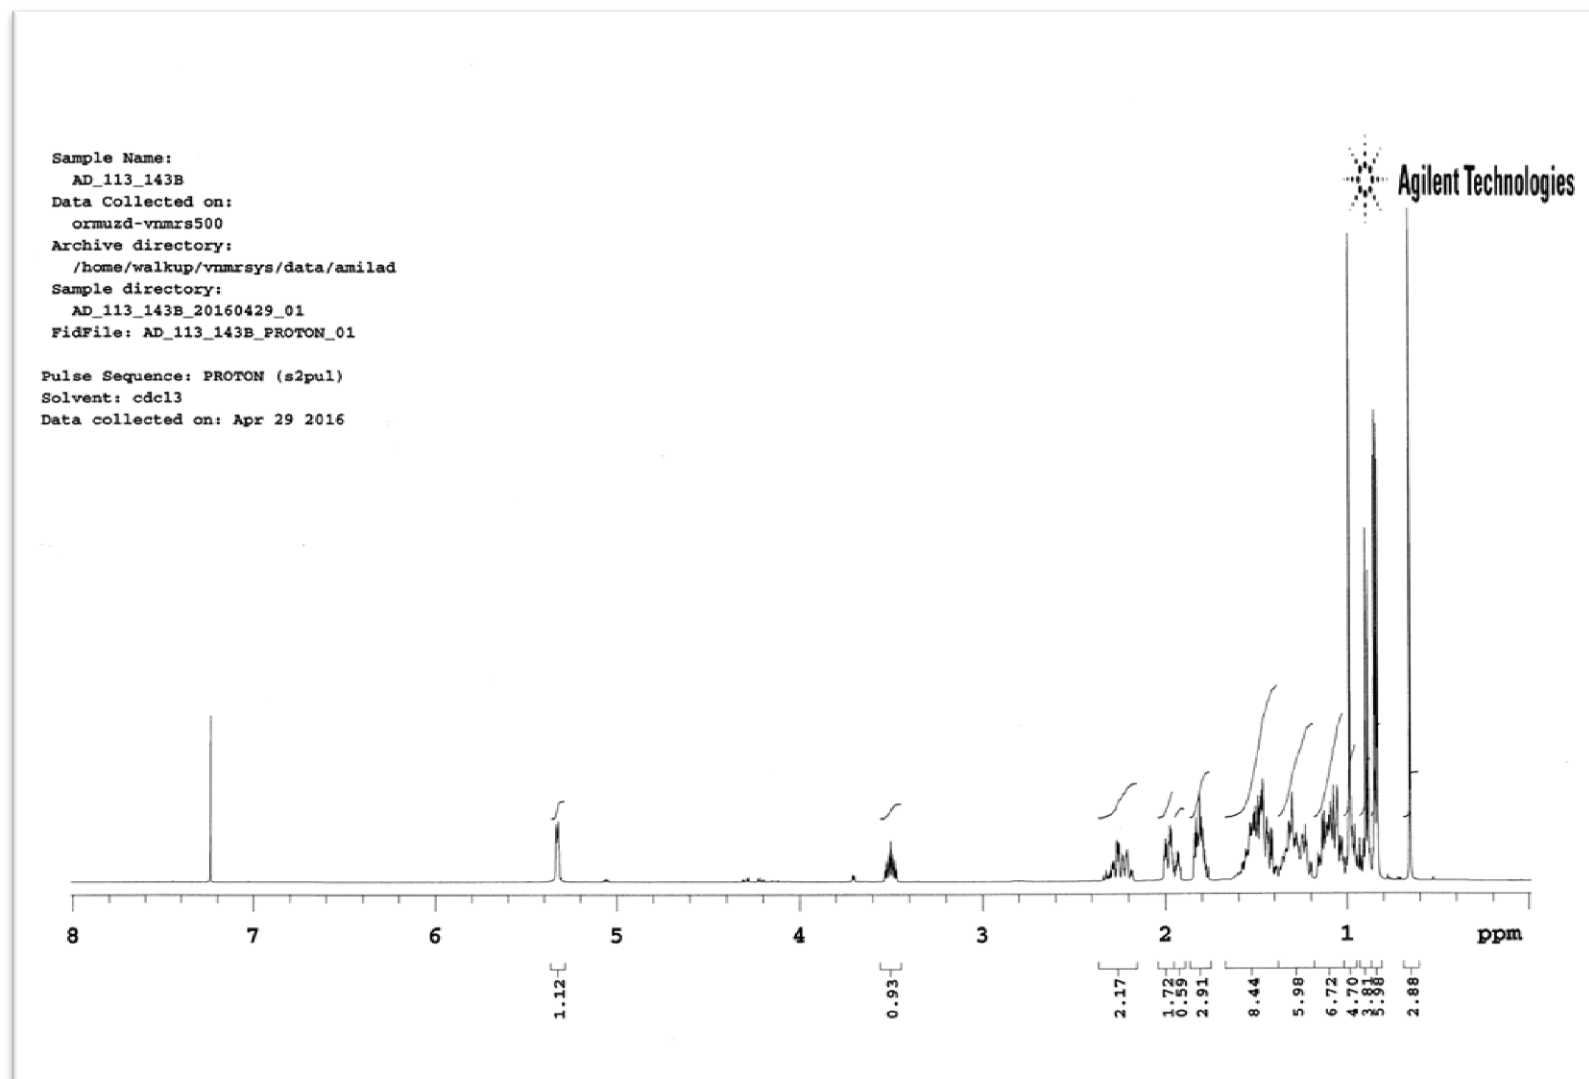

Supplement: Supplementary file [file 1]
