# Supplementary material
Source: publisher figshare collection journal article supplement (https://plos.figshare.com/articles/dataset/_/4482074)

# Chemical Characterization of Lipophilic Constituents in the Skin of Migratory Adult Sea Lamprey from the Great Lakes Region

Amila A. Dissanayake,<sup>1</sup> Muraleedharan G. Nair,<sup>1,3\*</sup>

Bioactive Natural Products and Phytochemicals Laboratory, Department of Horticulture,  
Michigan State University, East Lansing, Michigan 48824, USA

## Supplemental data

For total lipid mixture

**Figure A.** <sup>1</sup>H NMR spectrum of total lipid mixture of sea lamprey in CDCl<sub>3</sub>

**Figure B.** <sup>13</sup>C NMR spectrum of total lipid mixture of sea lamprey in CDCl<sub>3</sub>

**Figure C.** GC profile of methyl esters of total lipid mixture

For fatty acid mixture **D**

**Figure D.** <sup>1</sup>H NMR spectrum of fatty acid mixture in CDCl<sub>3</sub>

**Figure E.** GC profile of methyl esters of fatty acid mixture

**Figure F.** GCMS of the lauric acid, methyl ester

**Figure G.** GCMS of the myristic acid, methyl ester

**Figure H.** GCMS of the myristoleic acid, methyl ester

**Figure I.** GCMS of the palmitic acid, methyl ester

**Figure J.** GCMS of the stearic acid, methyl ester

**Figure K.** GCMS of the oleic acid, methyl ester

**Figure L.** GCMS of the arachidonic acid, methyl ester

**Figure M.** GCMS of the eicosapentaenoic acid, methyl ester

**Figure N.** GCMS of the docosahexaenoic acid, methyl ester

Figure A

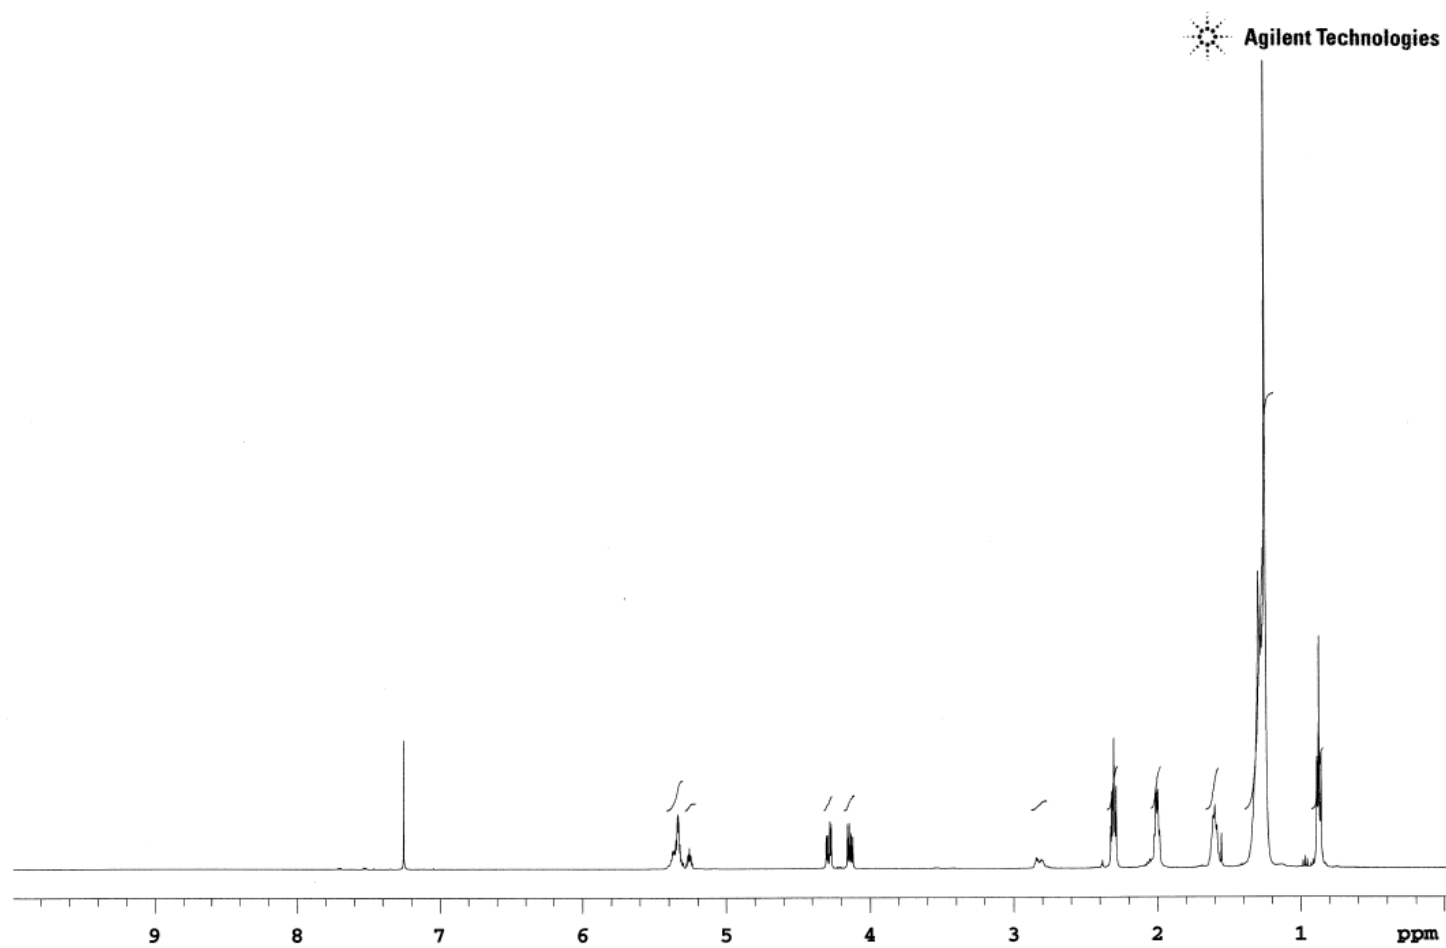

Figure B

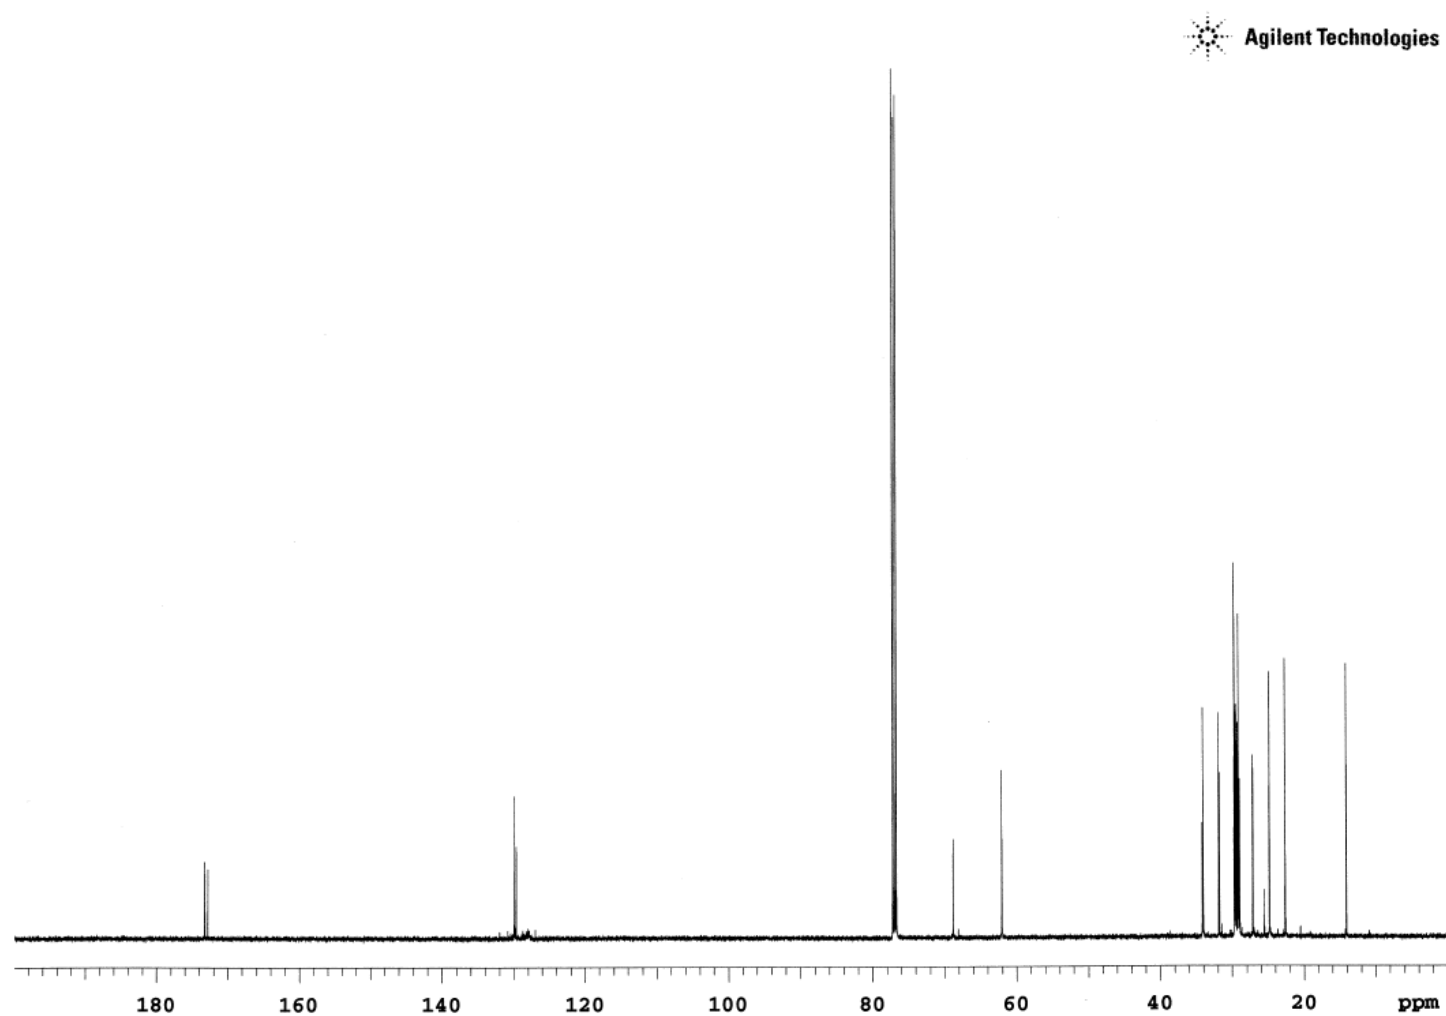

Abundance  
4.5e+07  
4e+07  
TIC: a072814\_06.D\data.ms  
thyl ester: 97  
decanoate: 99  
methyl ester: 99  
decanoate: 90

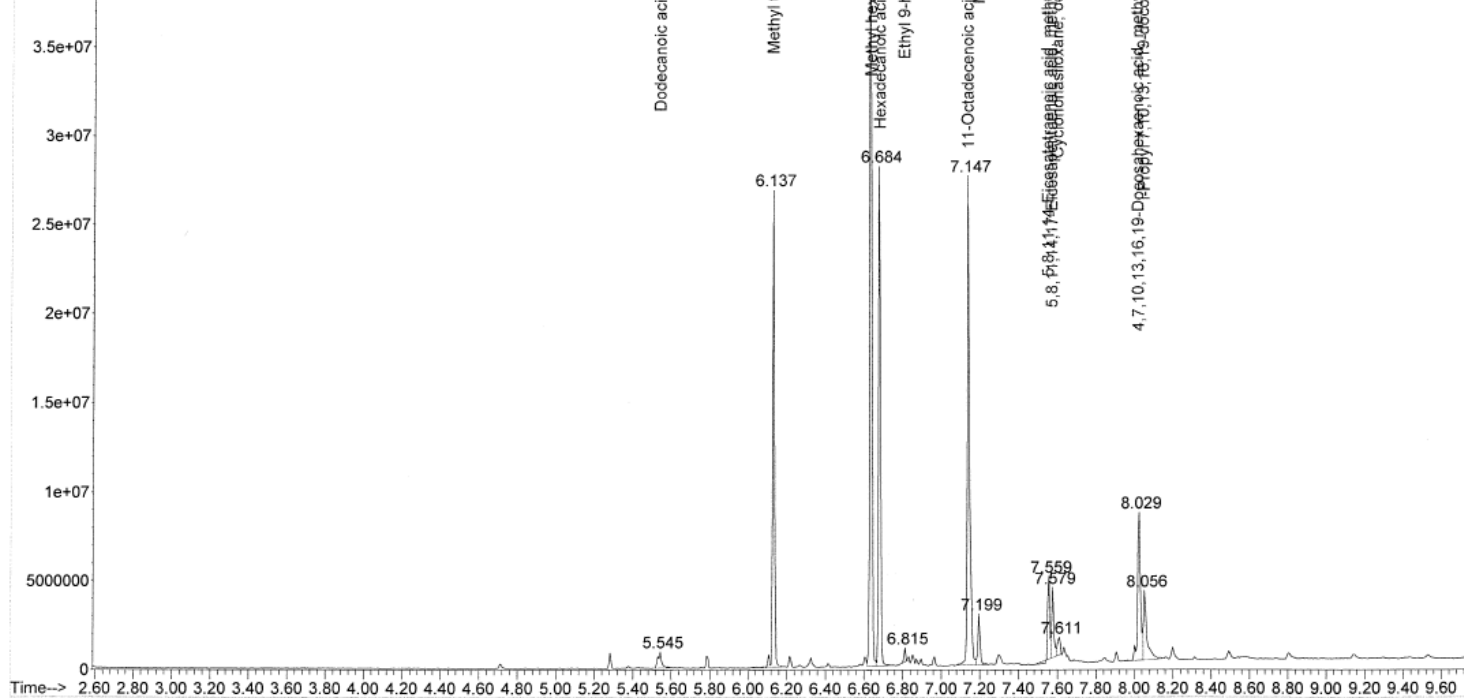

Figure D

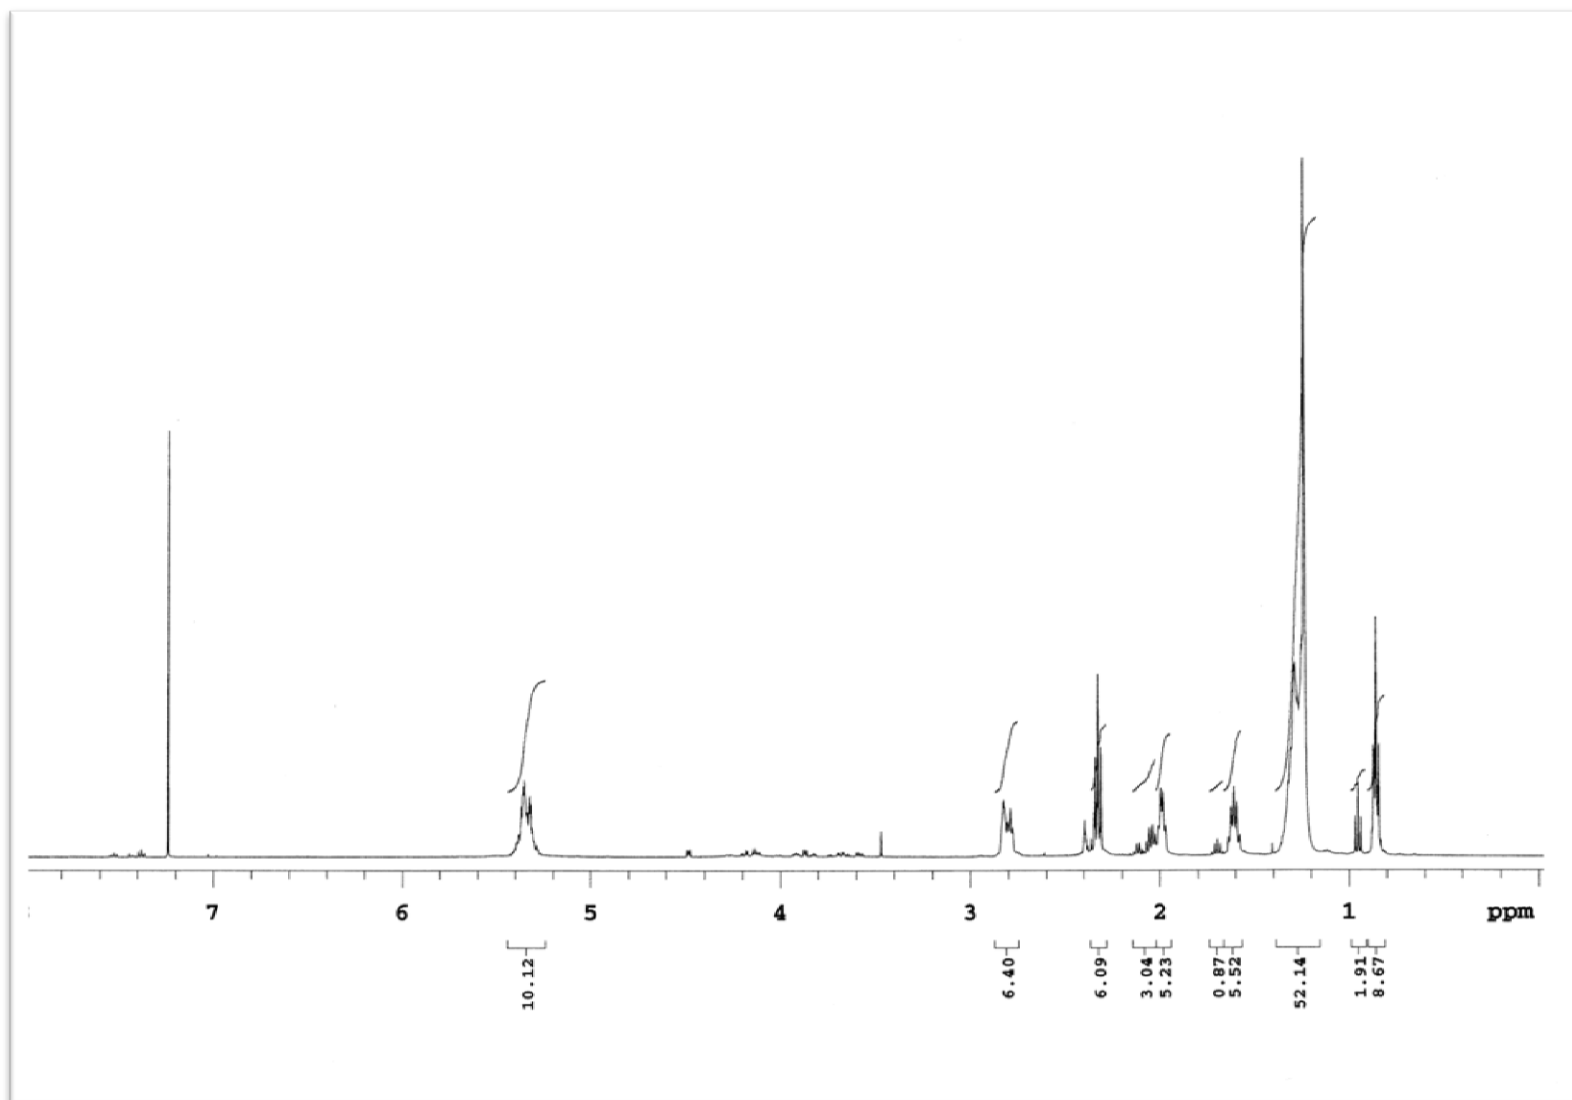

Figure E

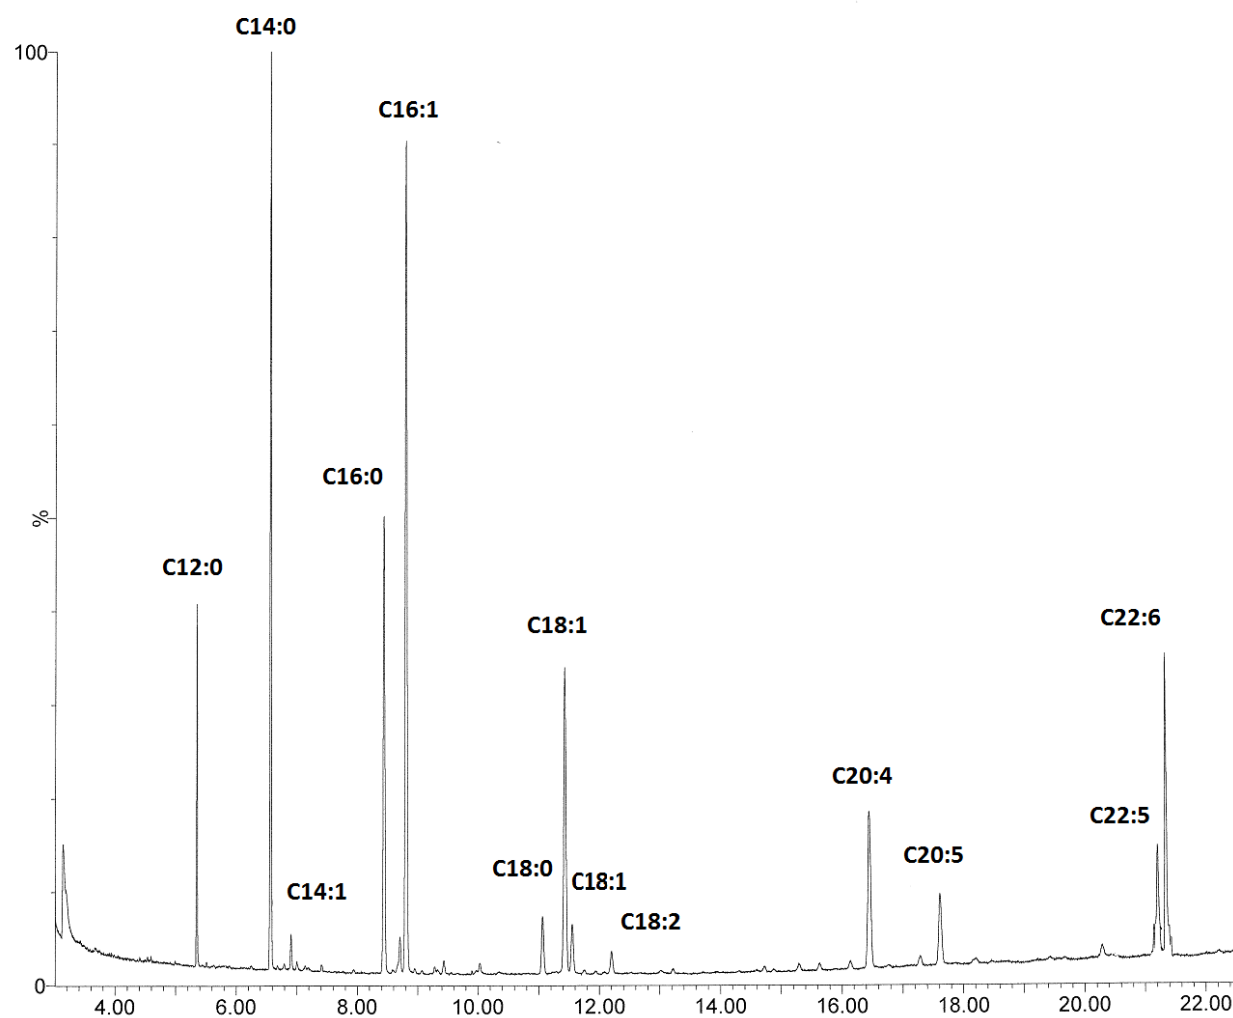

Figure F

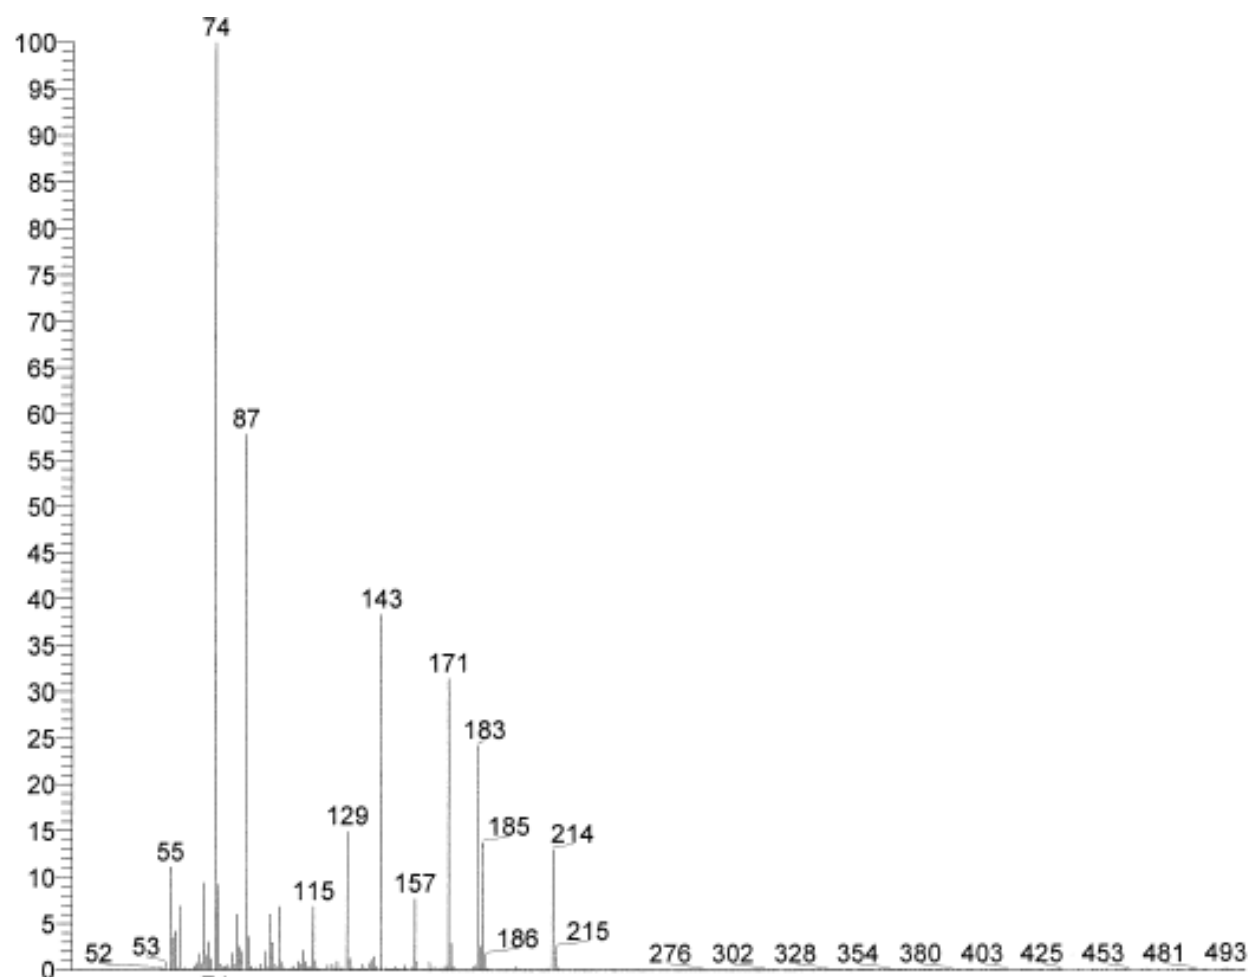

Figure G

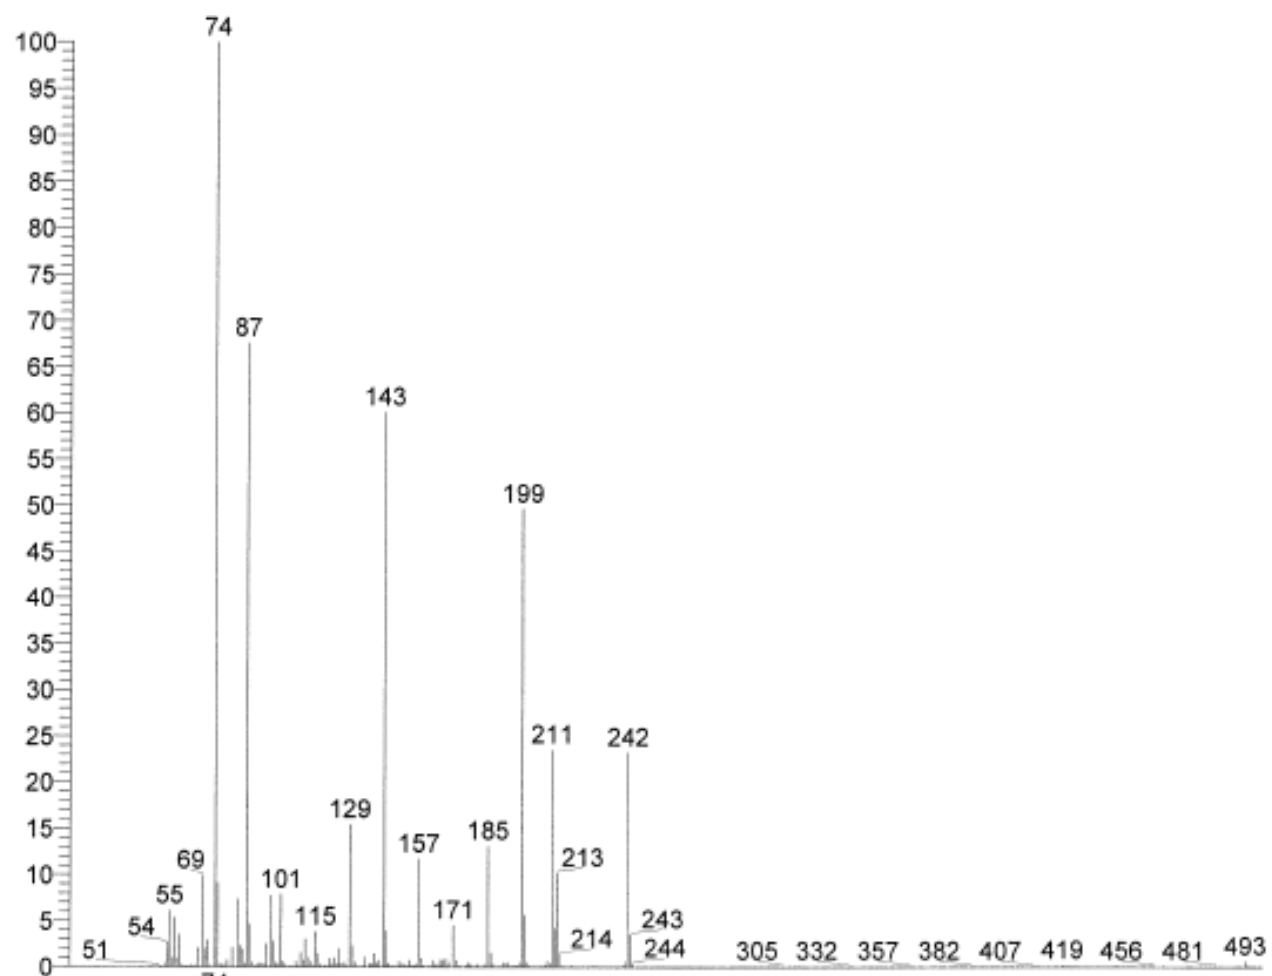



Figure H

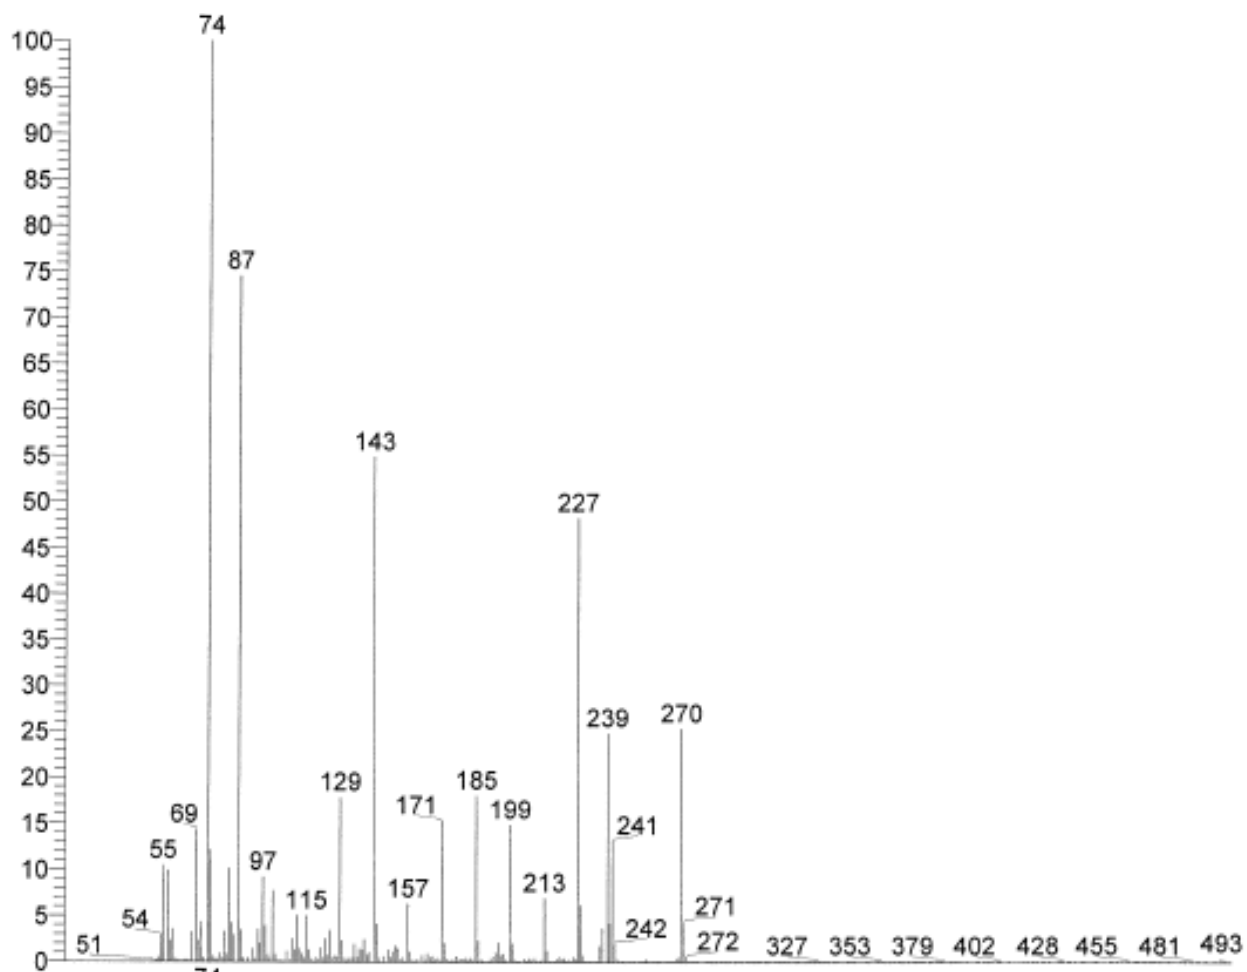

Figure I

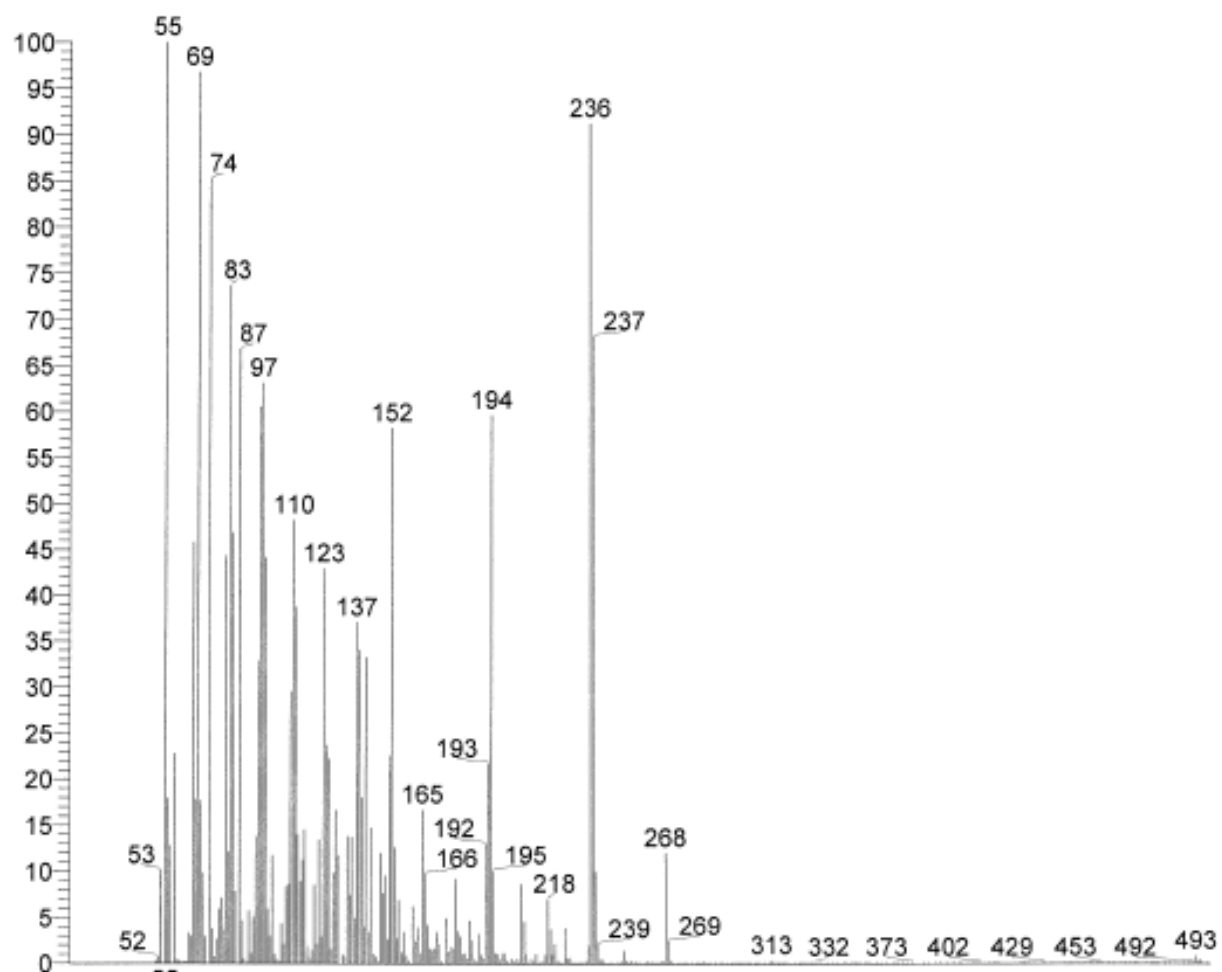

Figure J

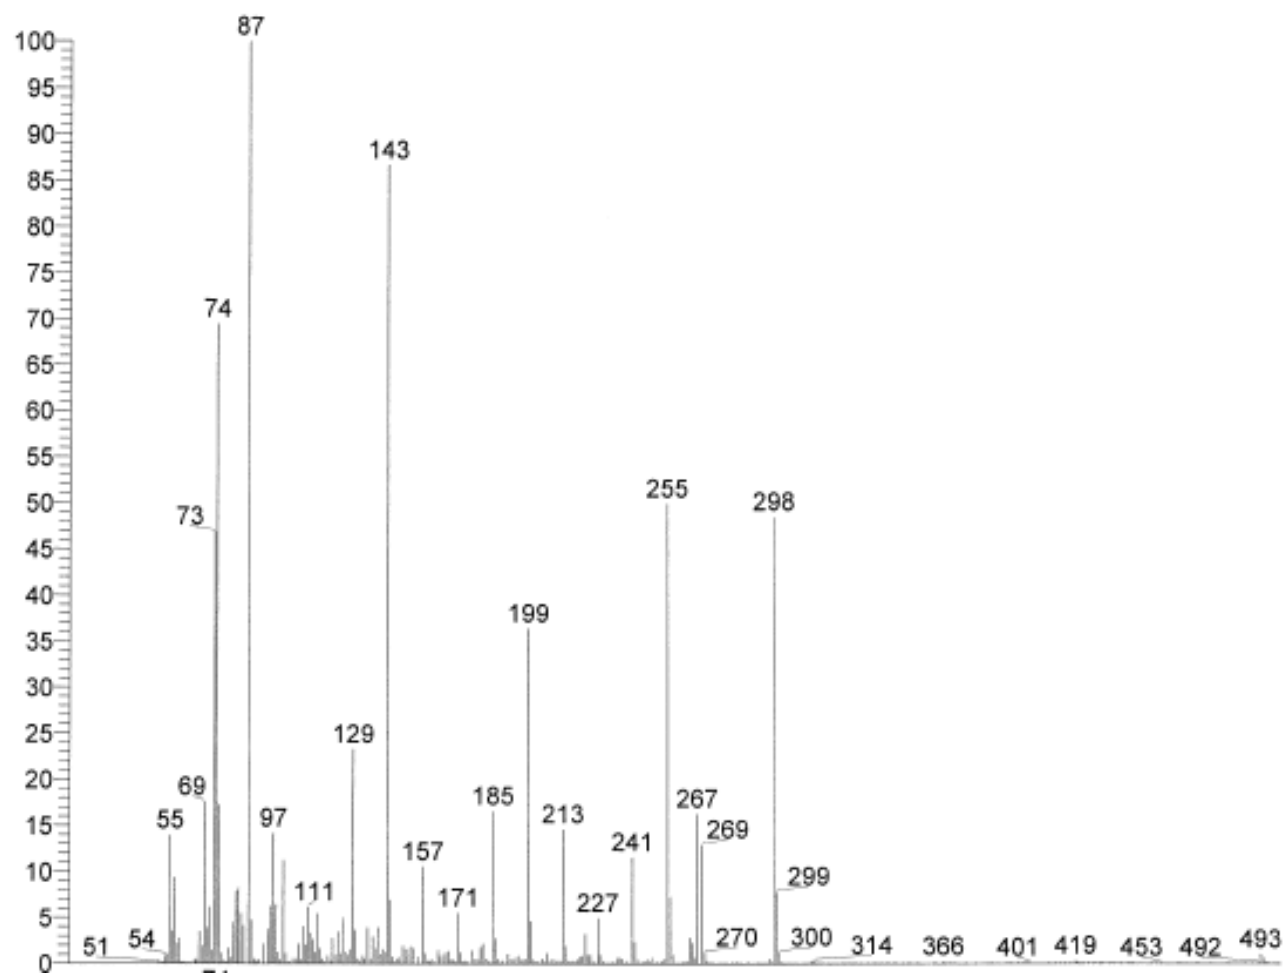

Figure K

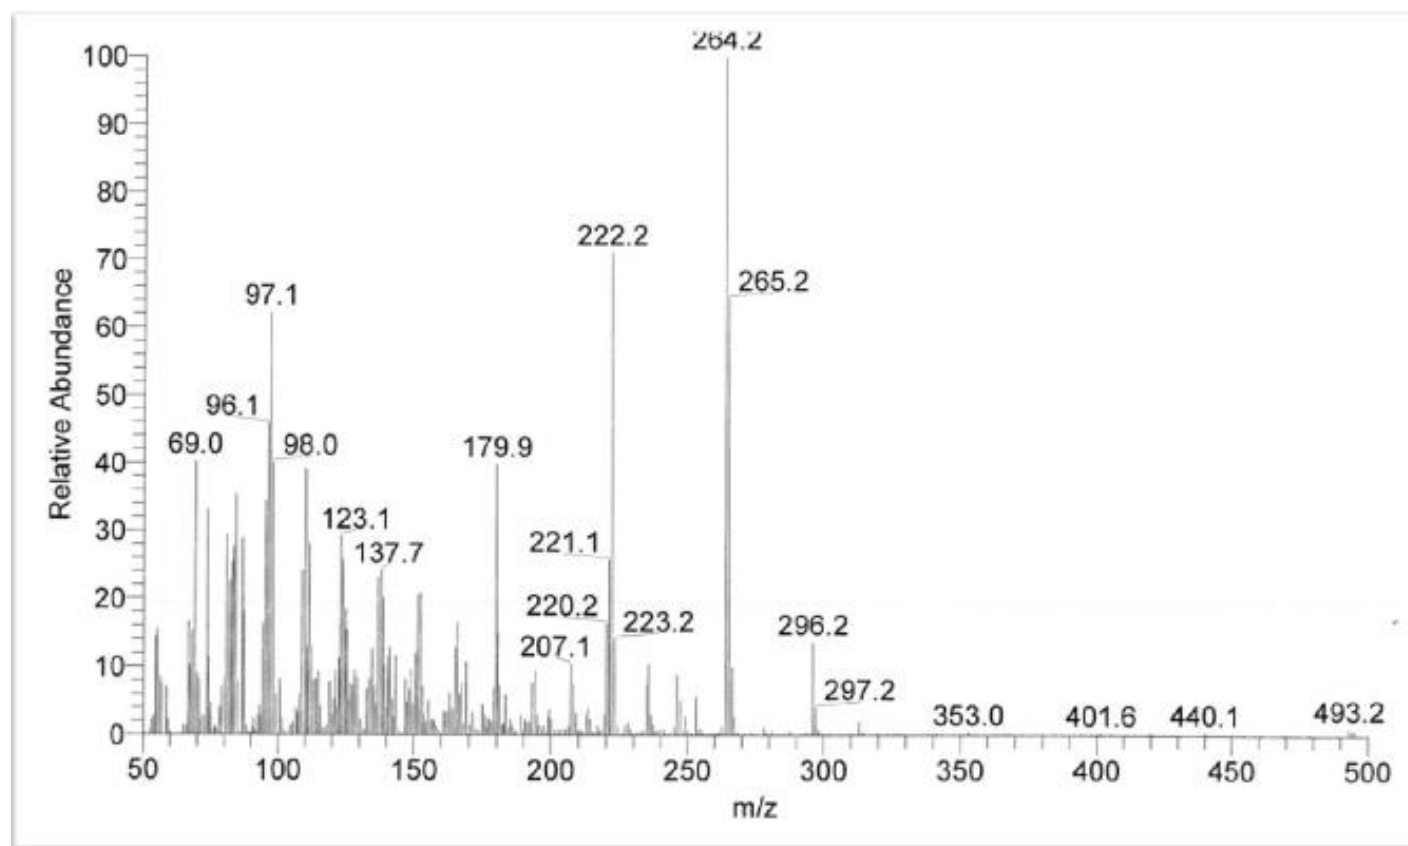

Figure L

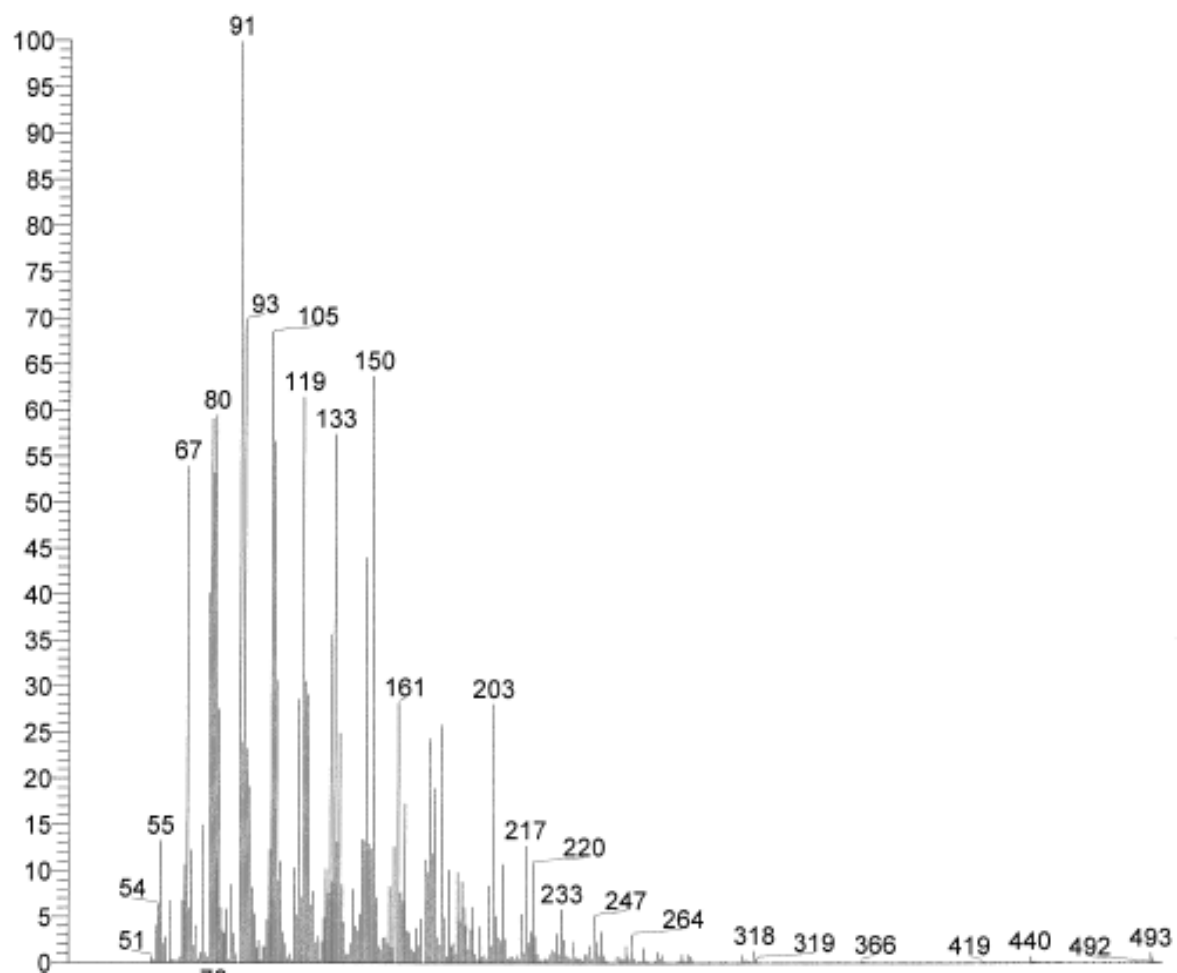

Figure M

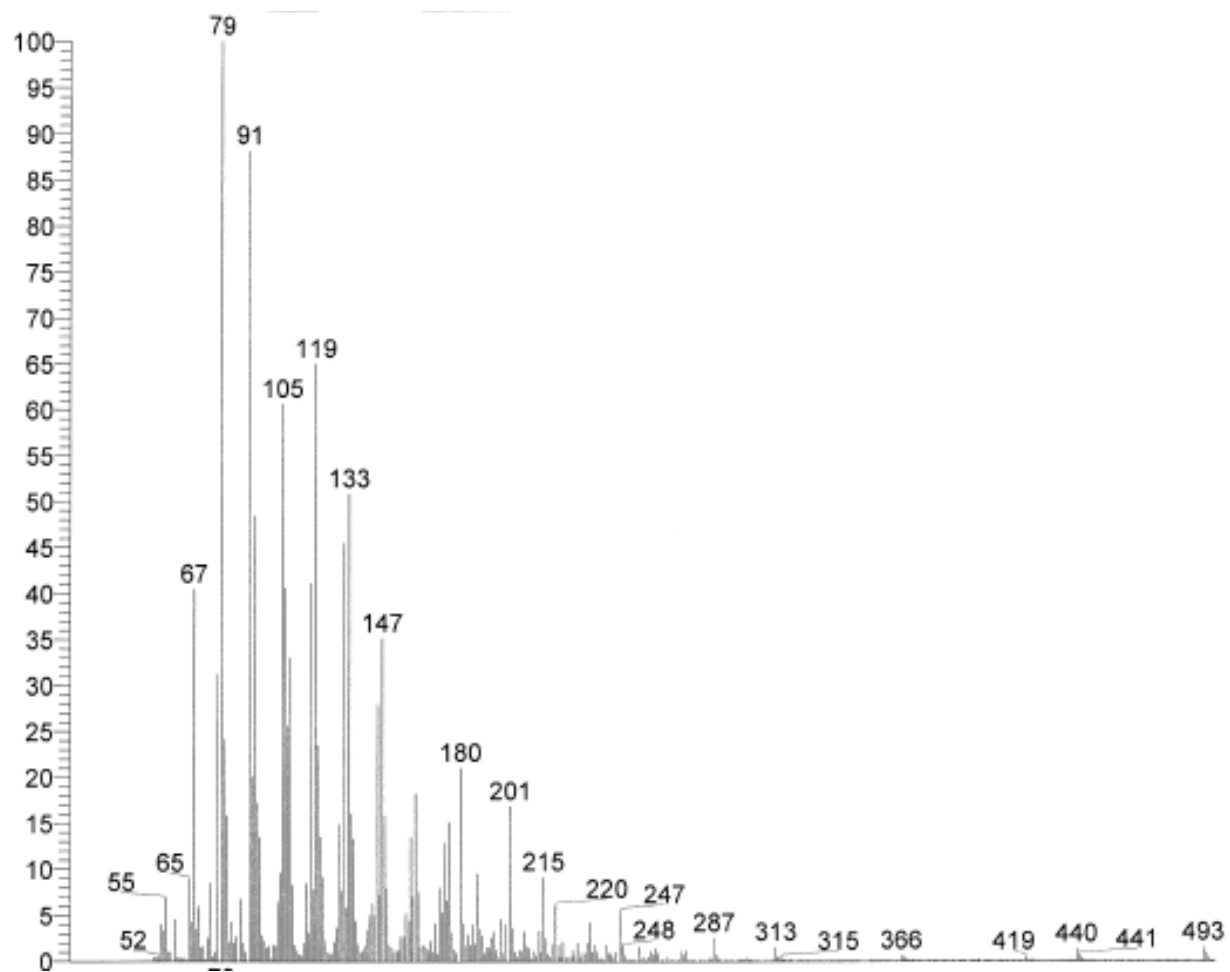

Figure N

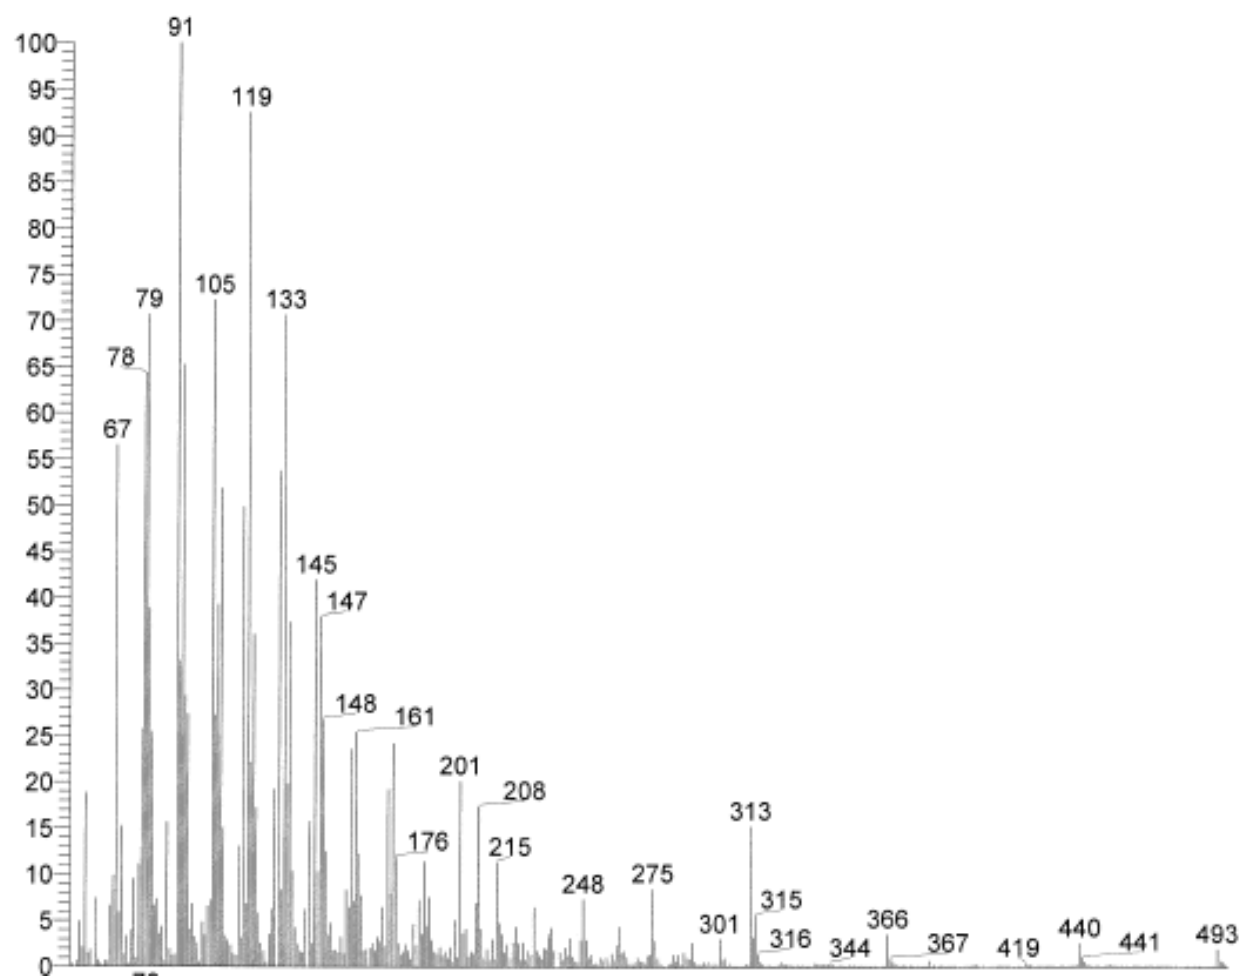

Supplement: Supplementary file [file 1]
