# Supplementary material
Source: publisher figshare collection journal article supplement (https://plos.figshare.com/articles/dataset/_/4482074)

# Chemical Characterization of Lipophilic Constituents in the Skin of Migratory Adult Sea Lamprey from the Great Lakes Region

Amila A. Dissanayake,<sup>1</sup> Muraleedharan G. Nair,<sup>1,3\*</sup>

Bioactive Natural Products and Phytochemicals Laboratory, Department of Horticulture,  
Michigan State University, East Lansing, Michigan 48824, USA

## Supplemental data

For compound **1**

**Figure A.** <sup>1</sup>H NMR spectrum of **1** in CDCl<sub>3</sub>

**Figure B.** <sup>13</sup>C NMR spectrum of **1** in CDCl<sub>3</sub>

**Figure C.** DEPT spectrum of **1** in CDCl<sub>3</sub>

**Figure D.** HMBC spectrum of **1** in CDCl<sub>3</sub>

**Figure E.** ESIMS (positive) spectrum **1**

**Figure F.** GCMS of the hexadecanoic acid, methyl ester

For compound **2**

**Figure G.** <sup>1</sup>H NMR spectrum **2** in CDCl<sub>3</sub>

**Figure H.** <sup>13</sup>C NMR spectrum **2** in CDCl<sub>3</sub>

**Figure I.** DEPT spectrum **2** in CDCl<sub>3</sub>

**Figure J.** HMBC spectrum **2** in CDCl<sub>3</sub>

**Figure K.** ESIMS (positive) spectrum **2**

**Figure L.** GCMS of the 9-octadecenoic acid (Z)-, methyl ester

For compound **3**

**Figure M.** <sup>1</sup>H NMR spectrum **3** in CDCl<sub>3</sub>

**Figure N.** <sup>13</sup>C NMR spectrum **3** in CDCl<sub>3</sub>

**Figure O.** DEPT spectrum **3** in CDCl<sub>3</sub>

**Figure P.** HMBC spectrum **3** in CDCl<sub>3</sub>

**Figure Q.** ESIMS (positive) spectrum **3**

**Figure R.** GCMS of the arachidonic acid, methyl ester

For compound **4**

**Figure S.** <sup>1</sup>H NMR spectrum **4** in CDCl<sub>3</sub>

**Figure T.** <sup>13</sup>C NMR spectrum **4** in CDCl<sub>3</sub>

**Figure U.** DEPT spectrum **4** in CDCl<sub>3</sub>

**Figure V.** HMBC spectrum **4** in CDCl<sub>3</sub>

**Figure W.** ESIMS (positive) spectrum **4**

**Figure X.** GCMS of the eicosapentaenoic acid, methyl ester

Figure A

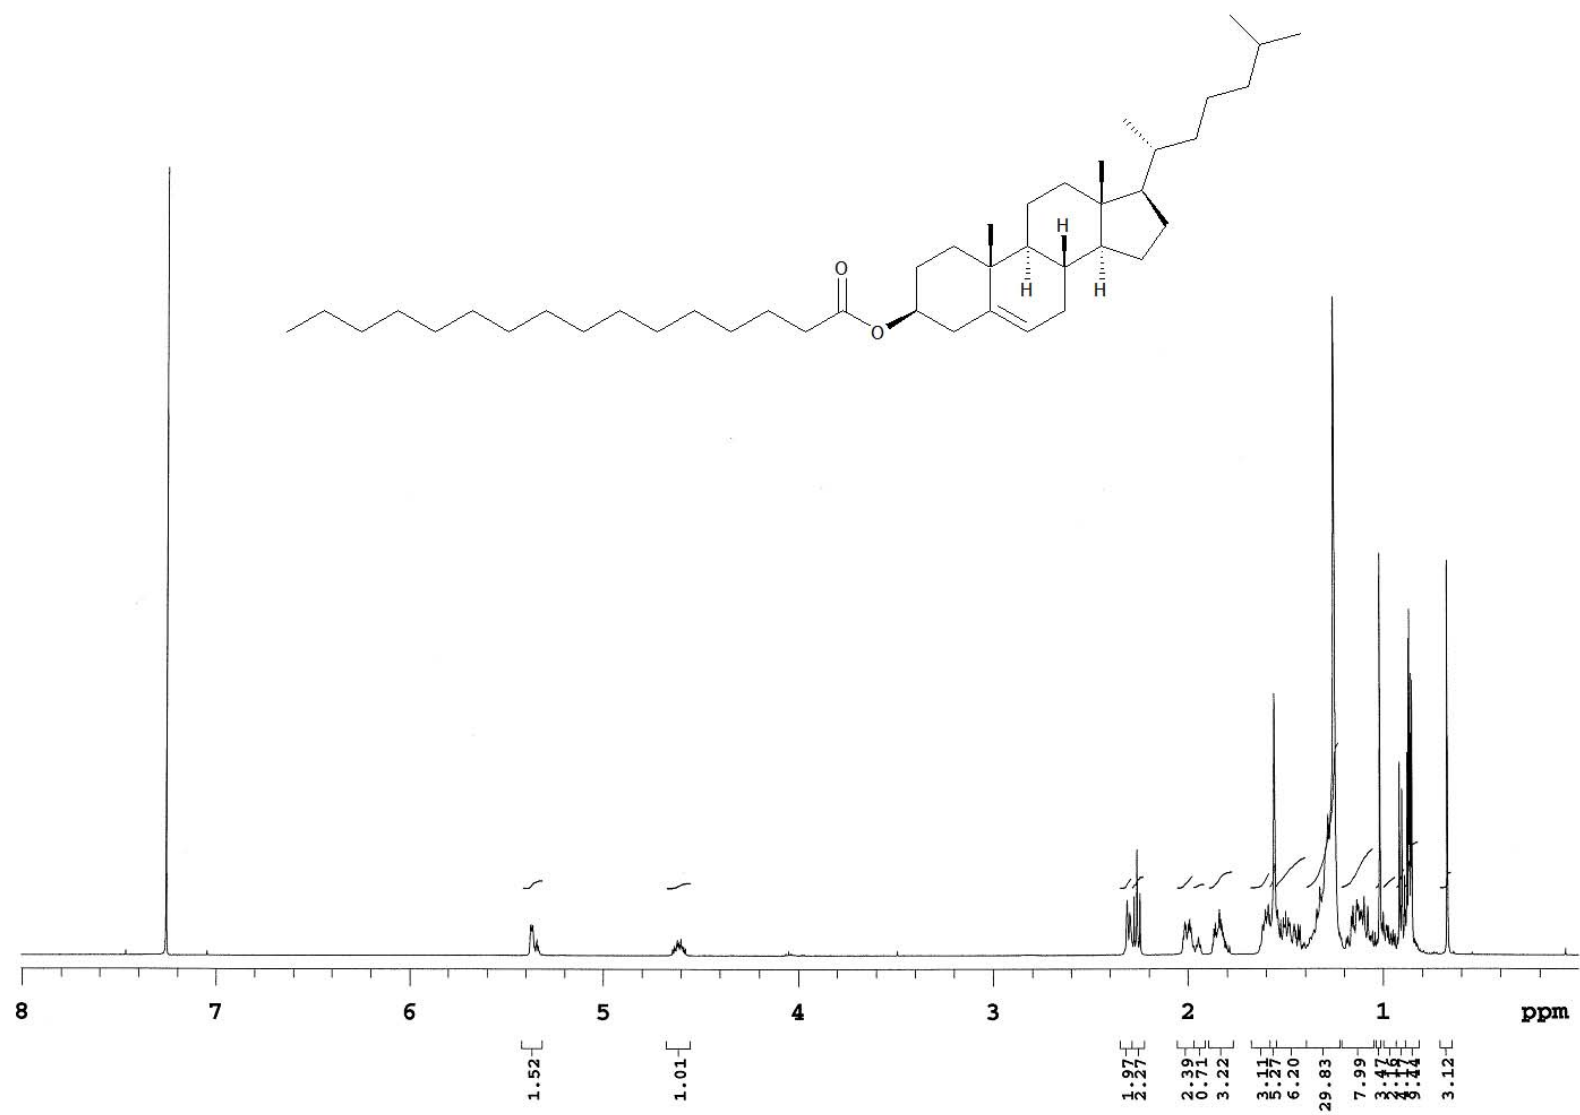

Figure B

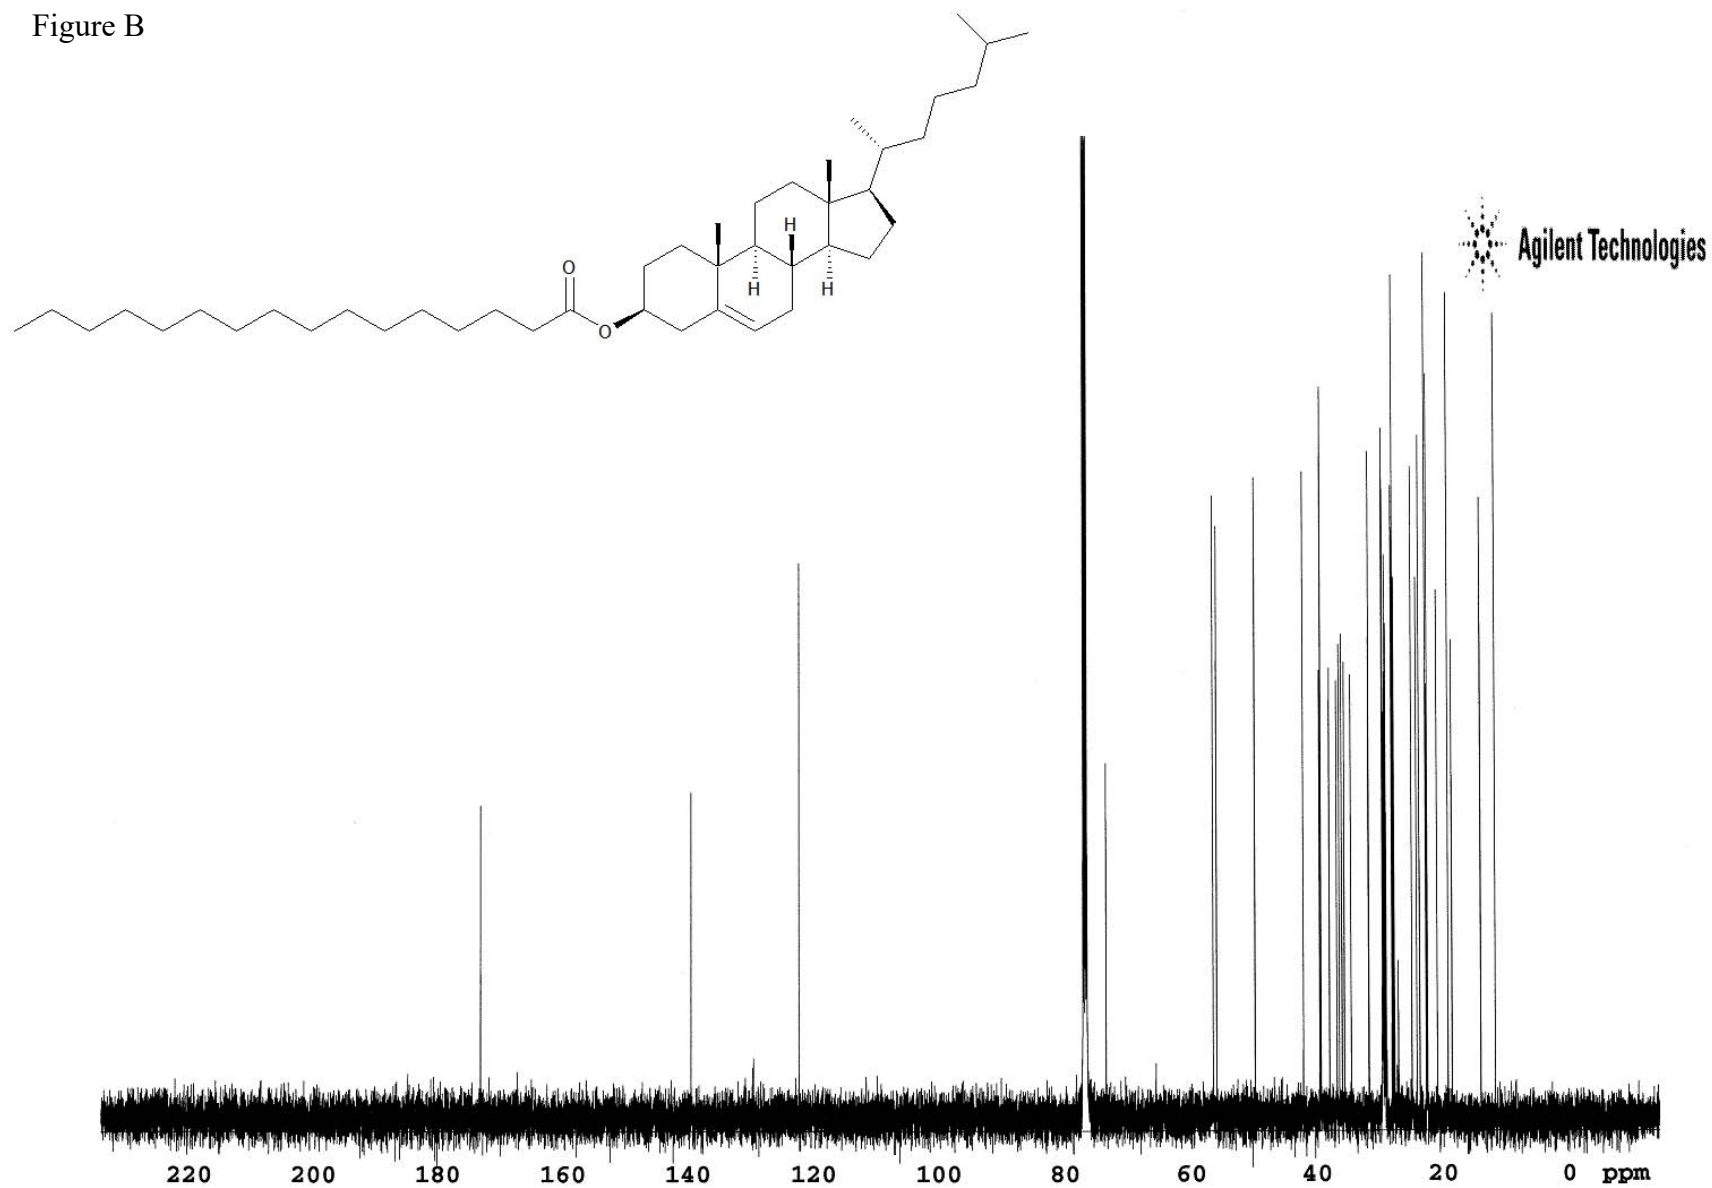

Figure C

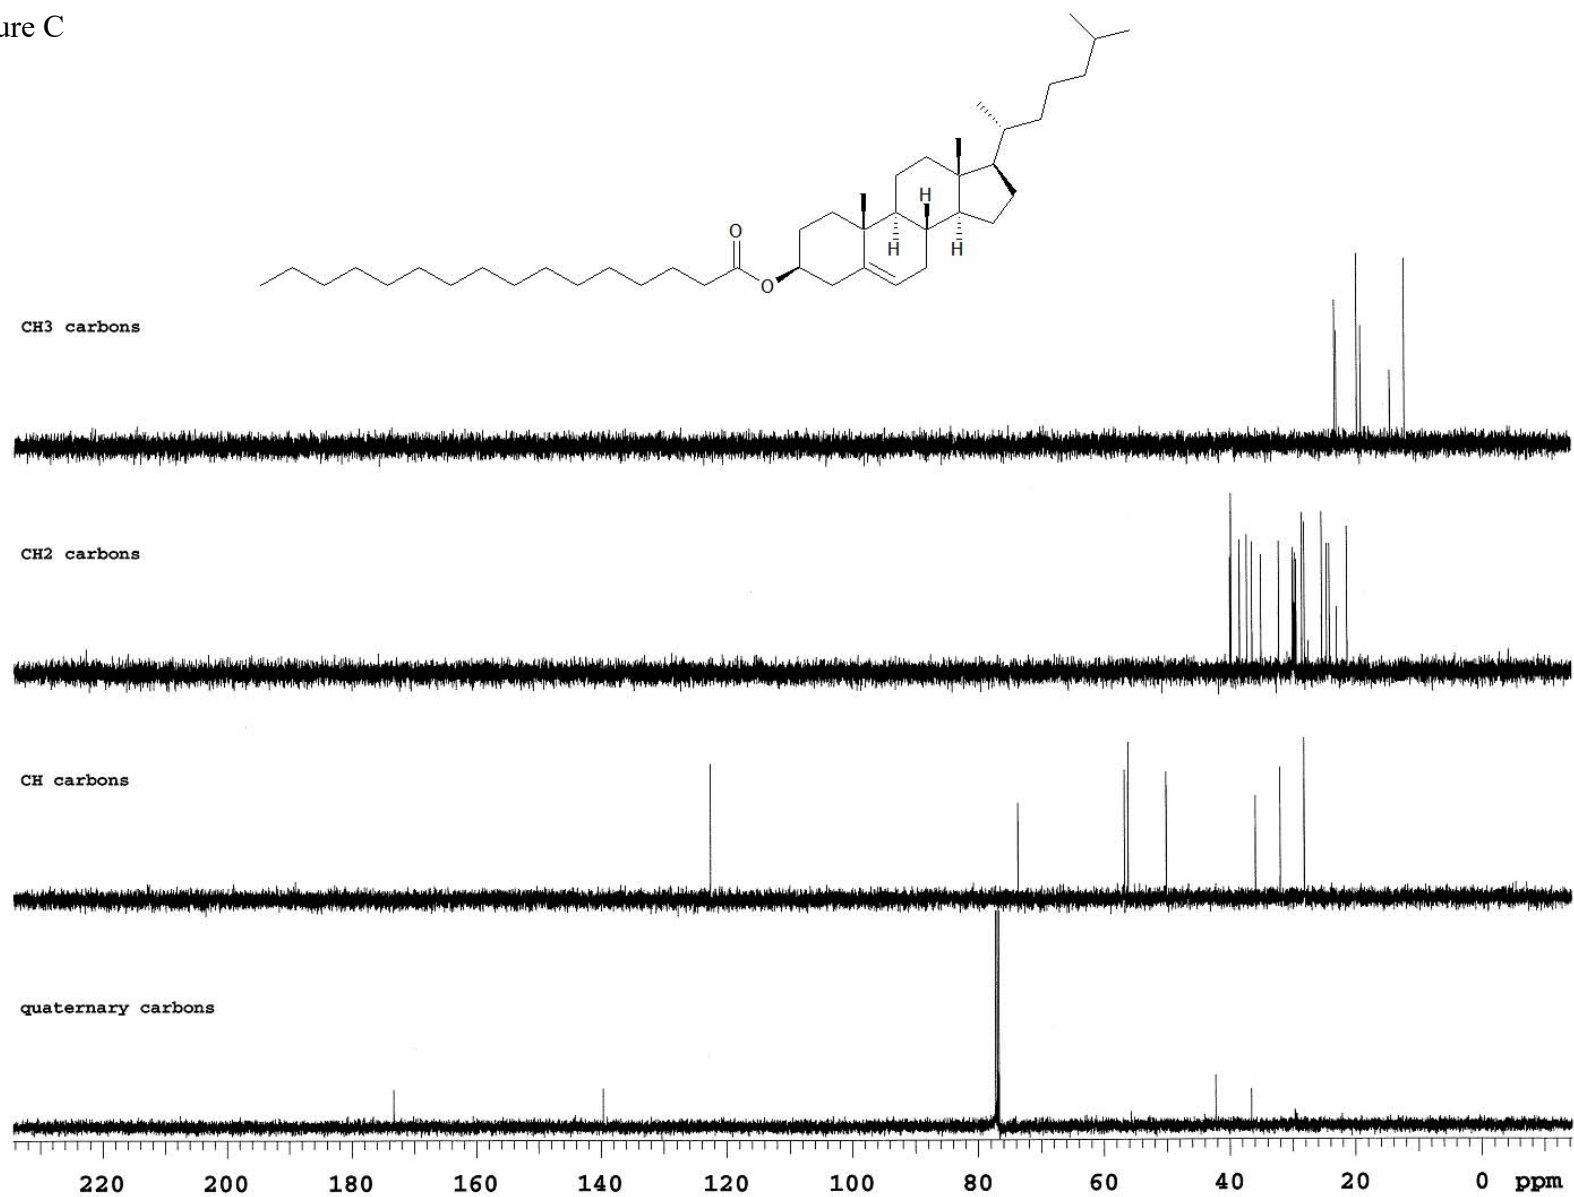

Figure D

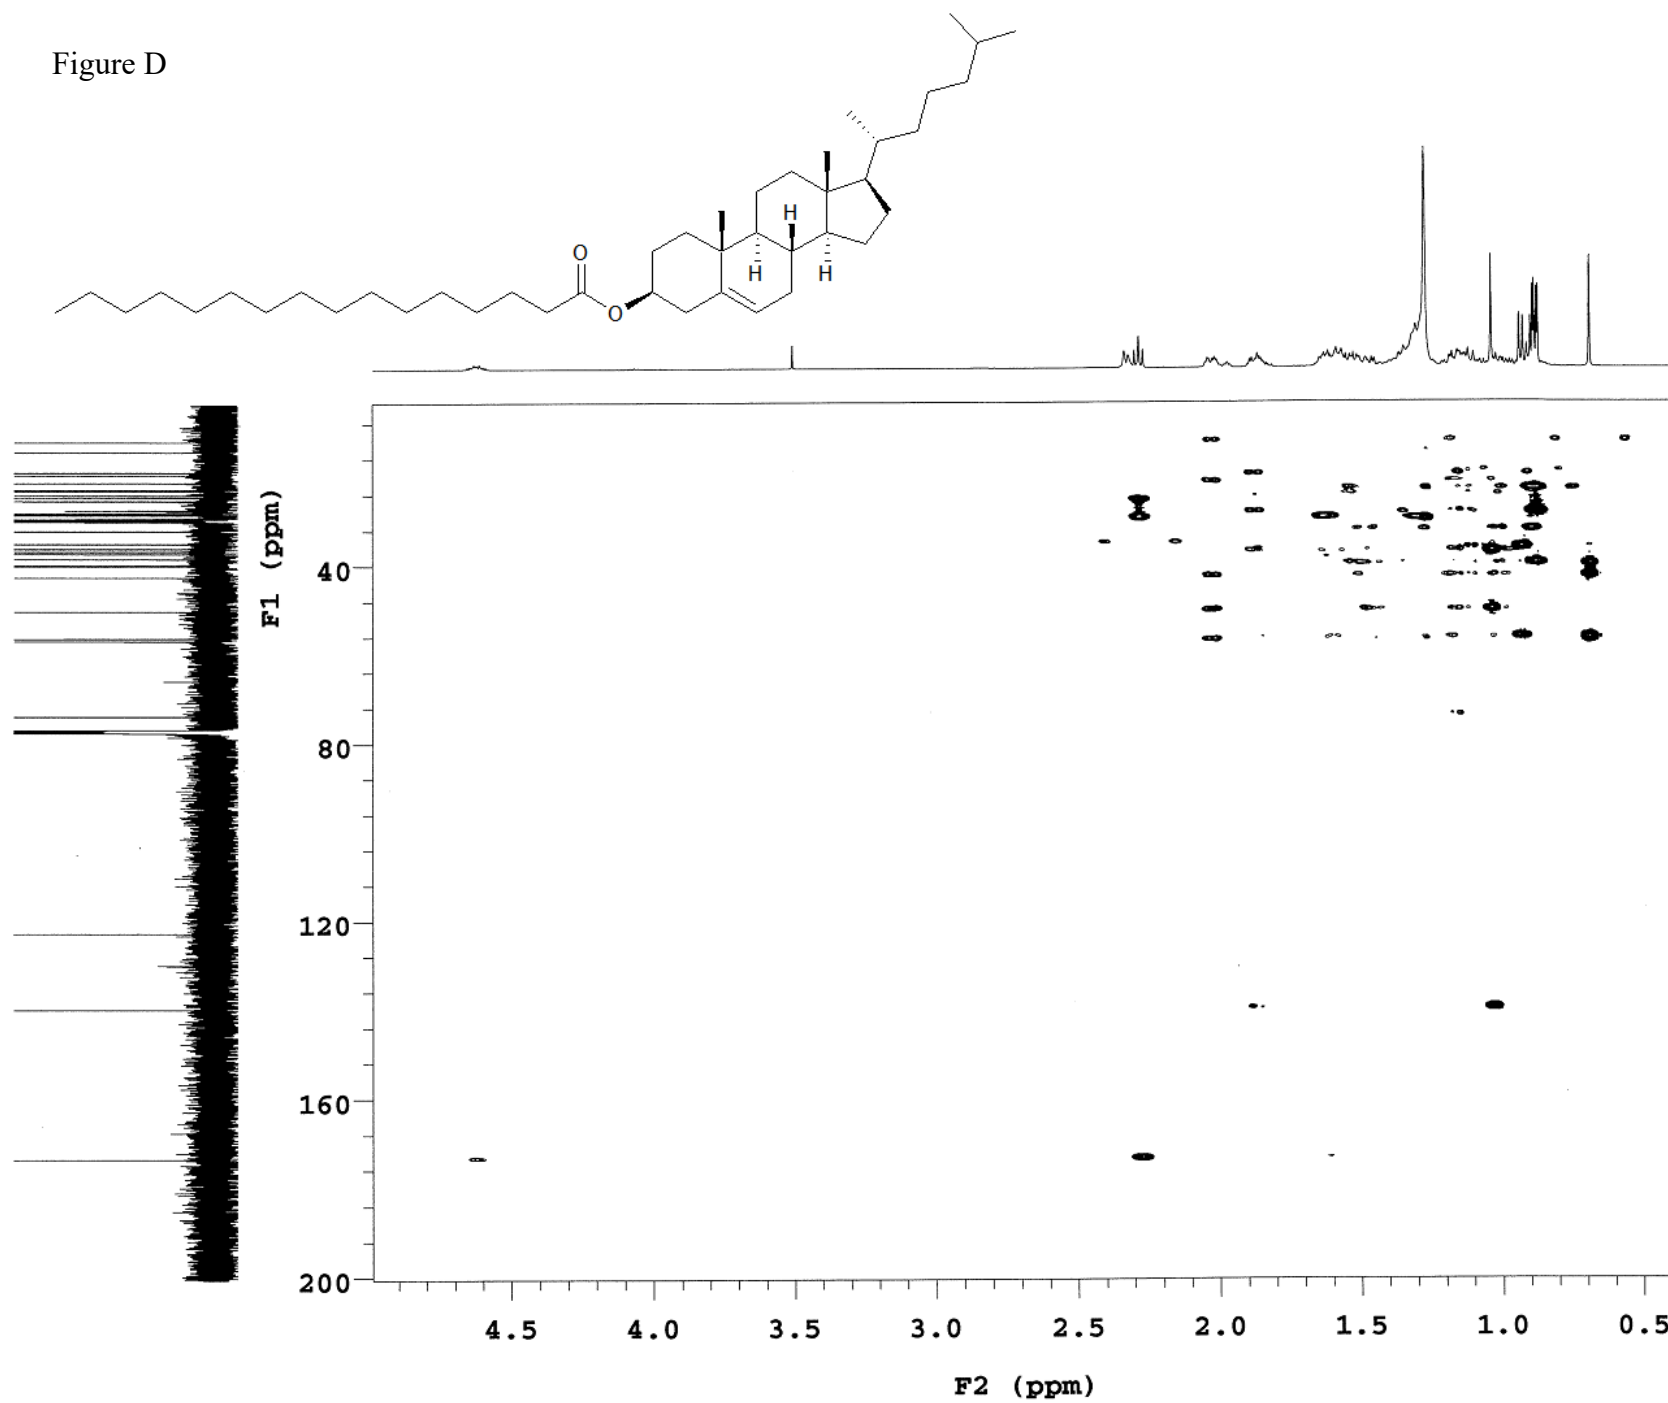

Figure E

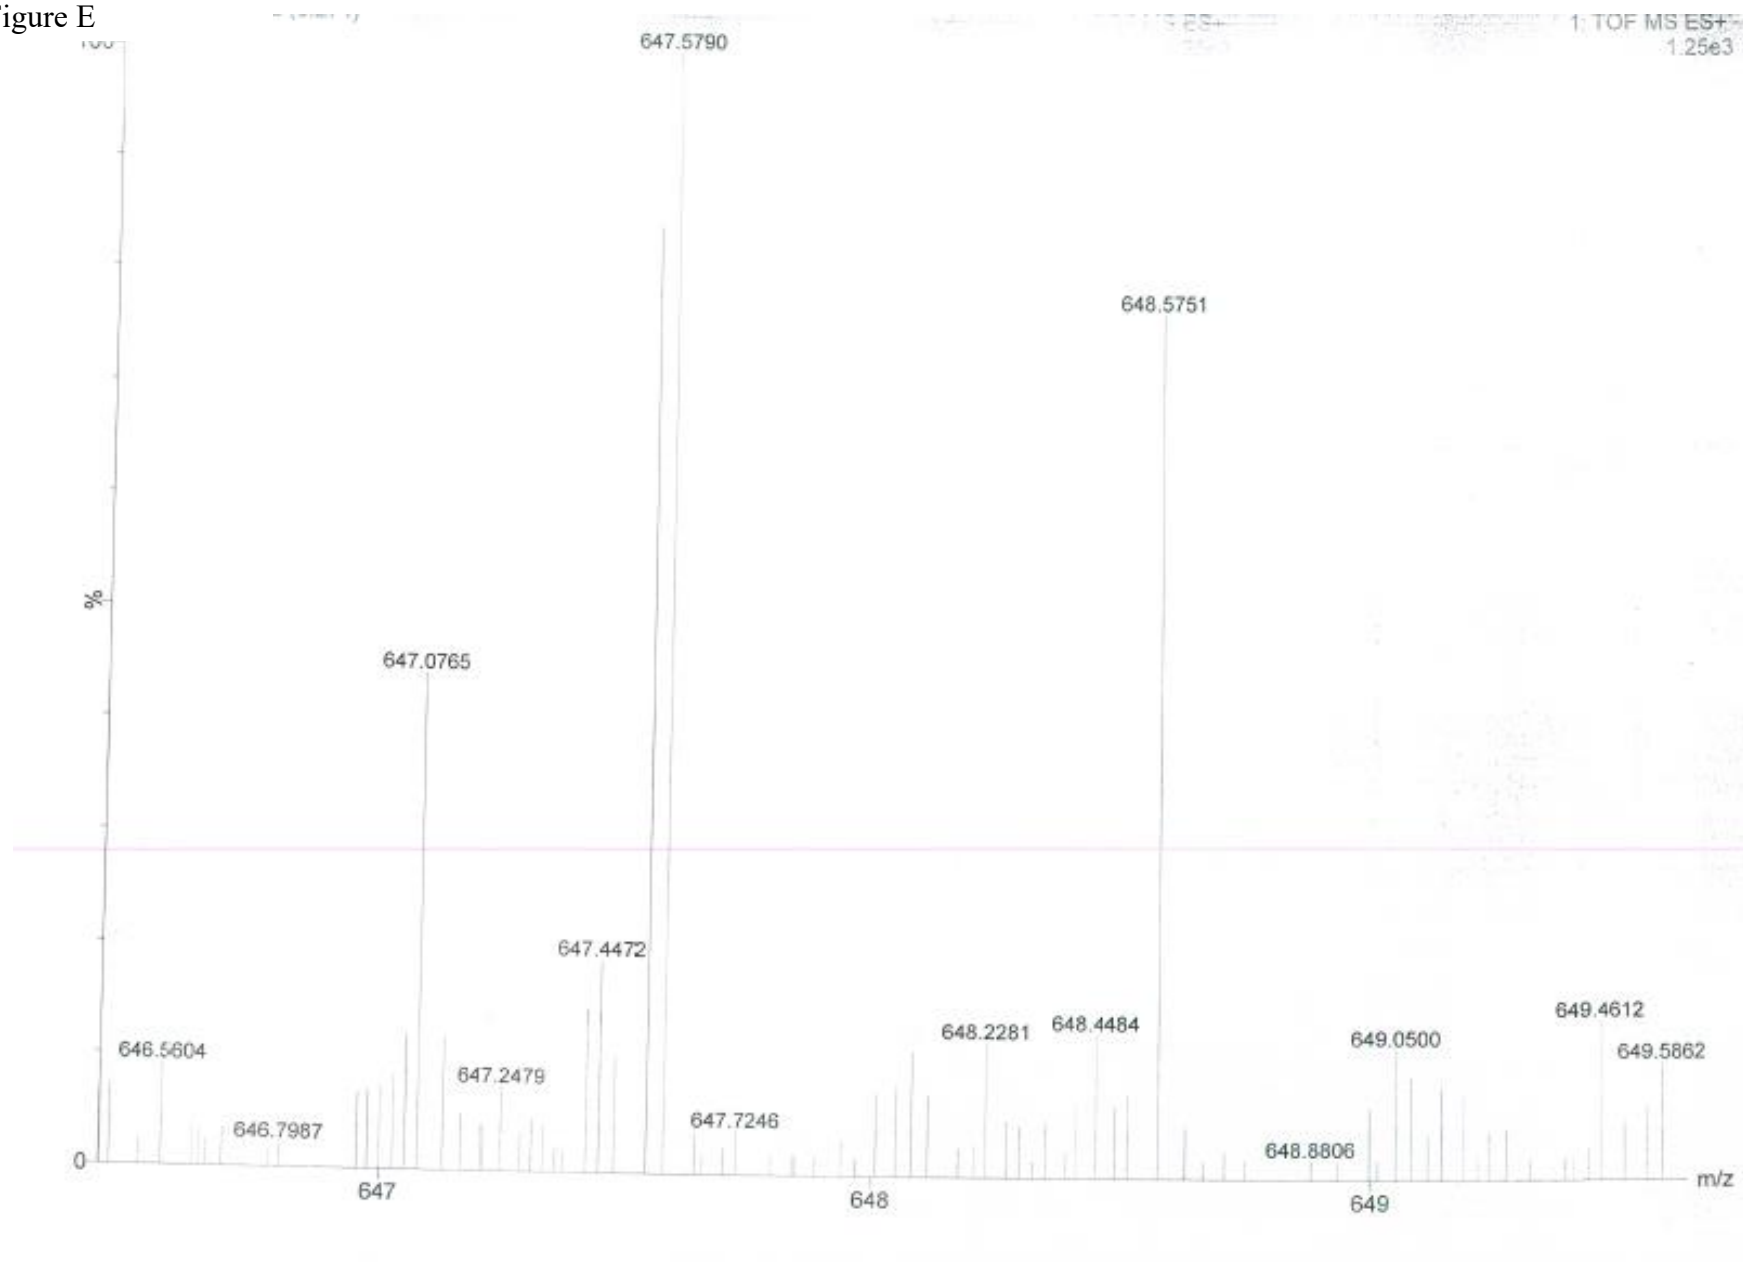

Figure F

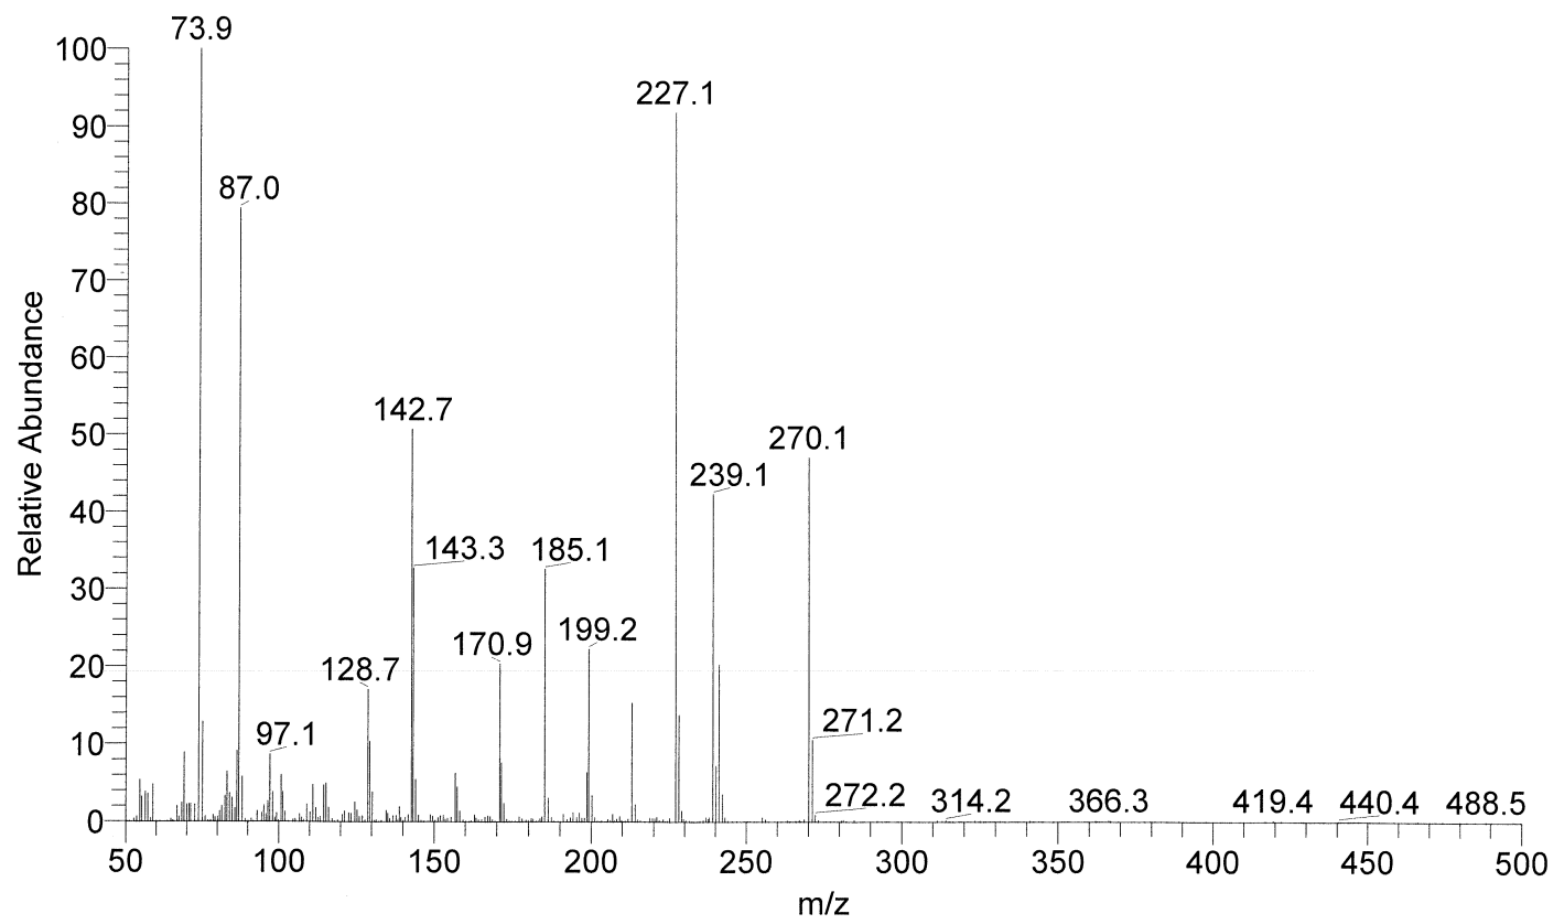

Figure G

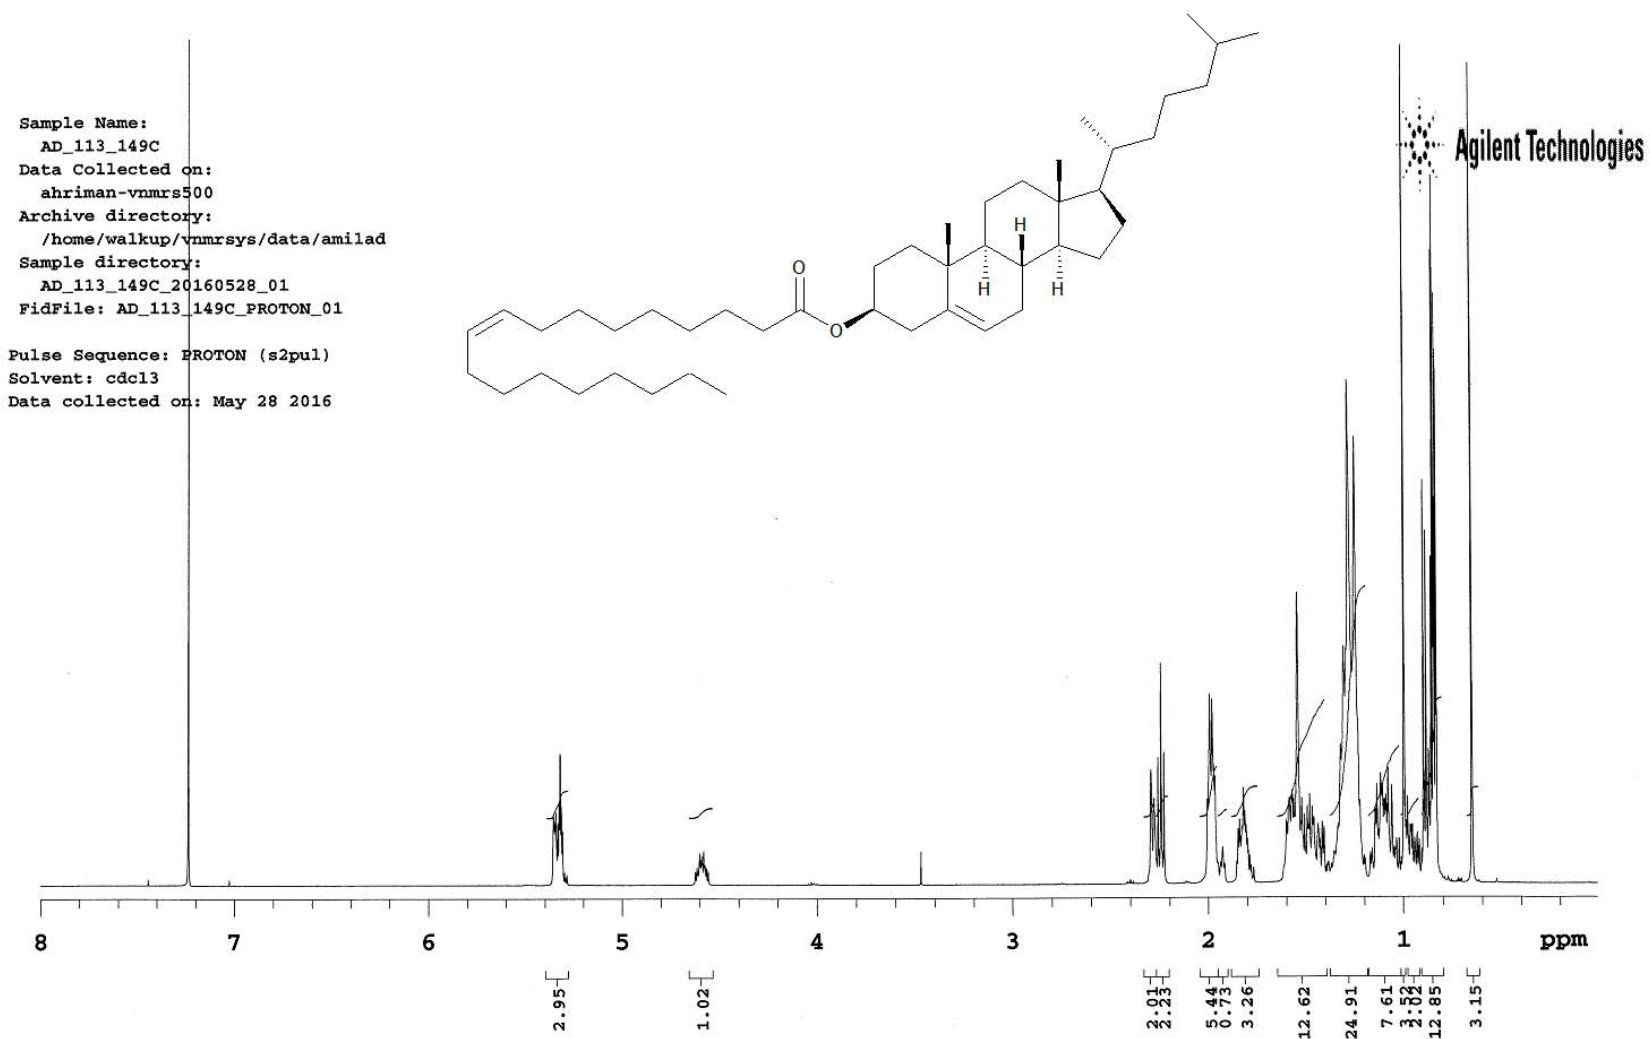



Figure H

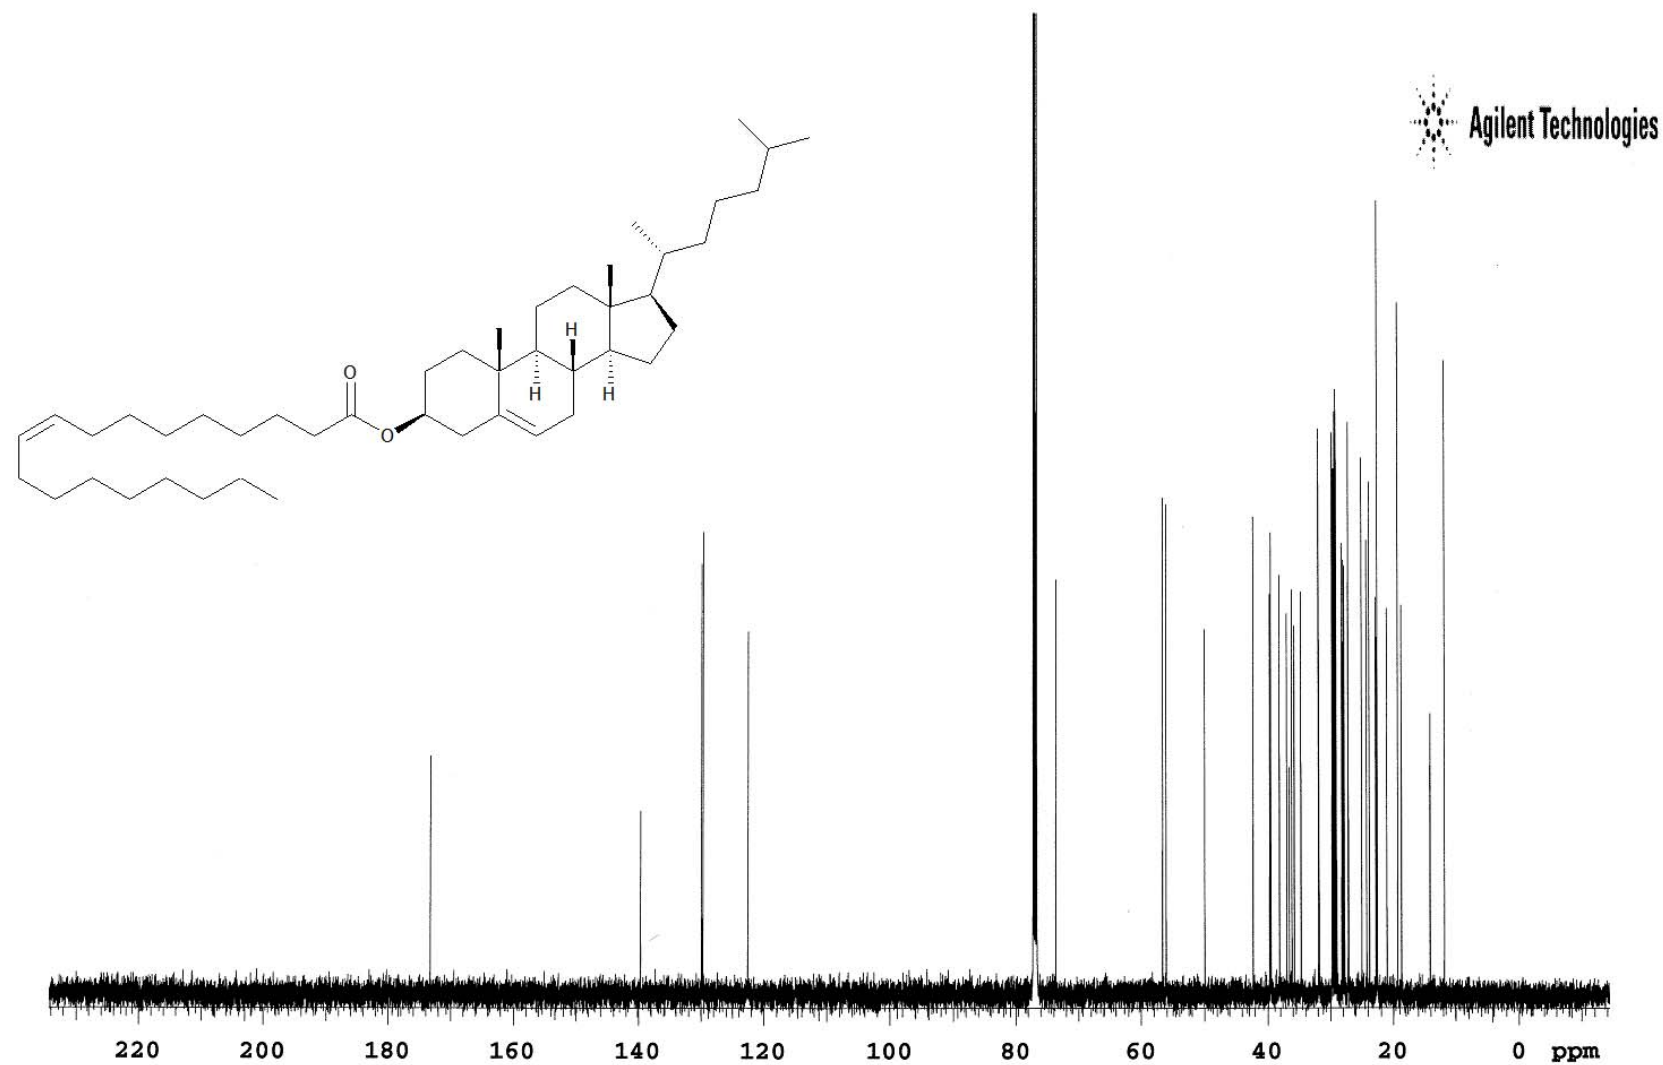

Figure I

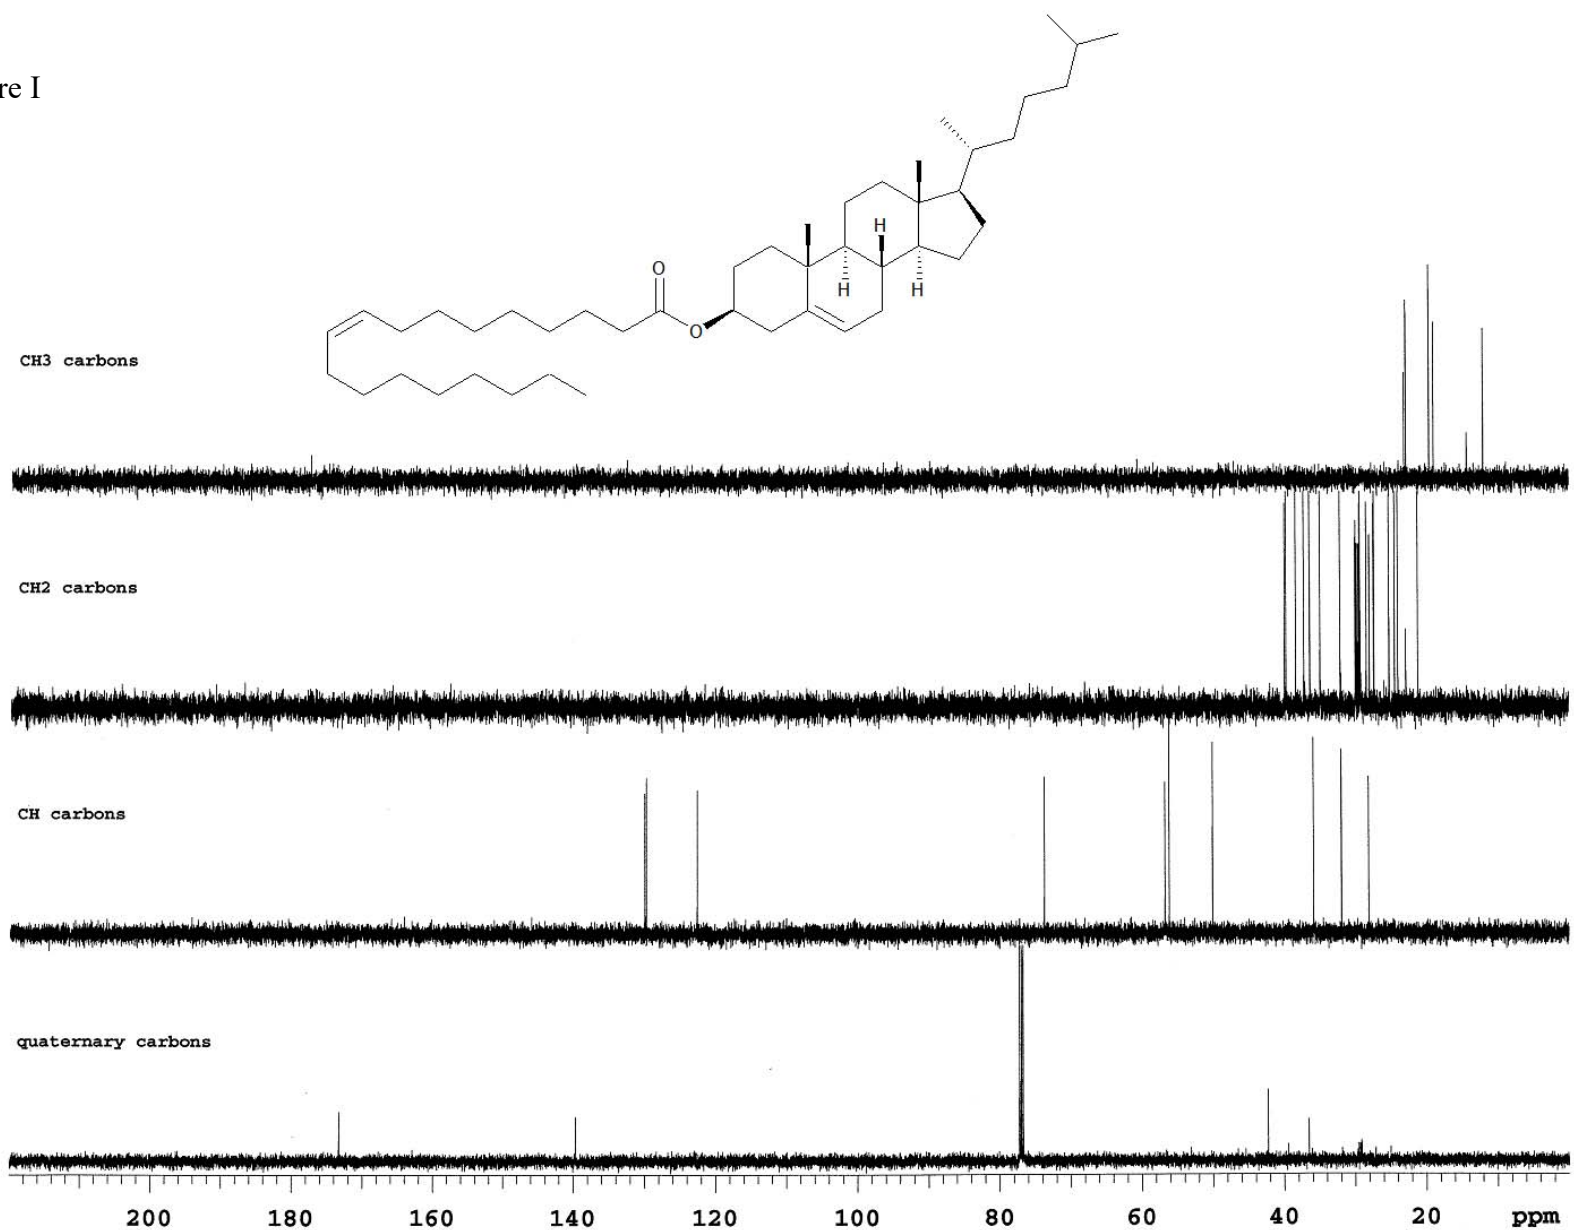

Figure J

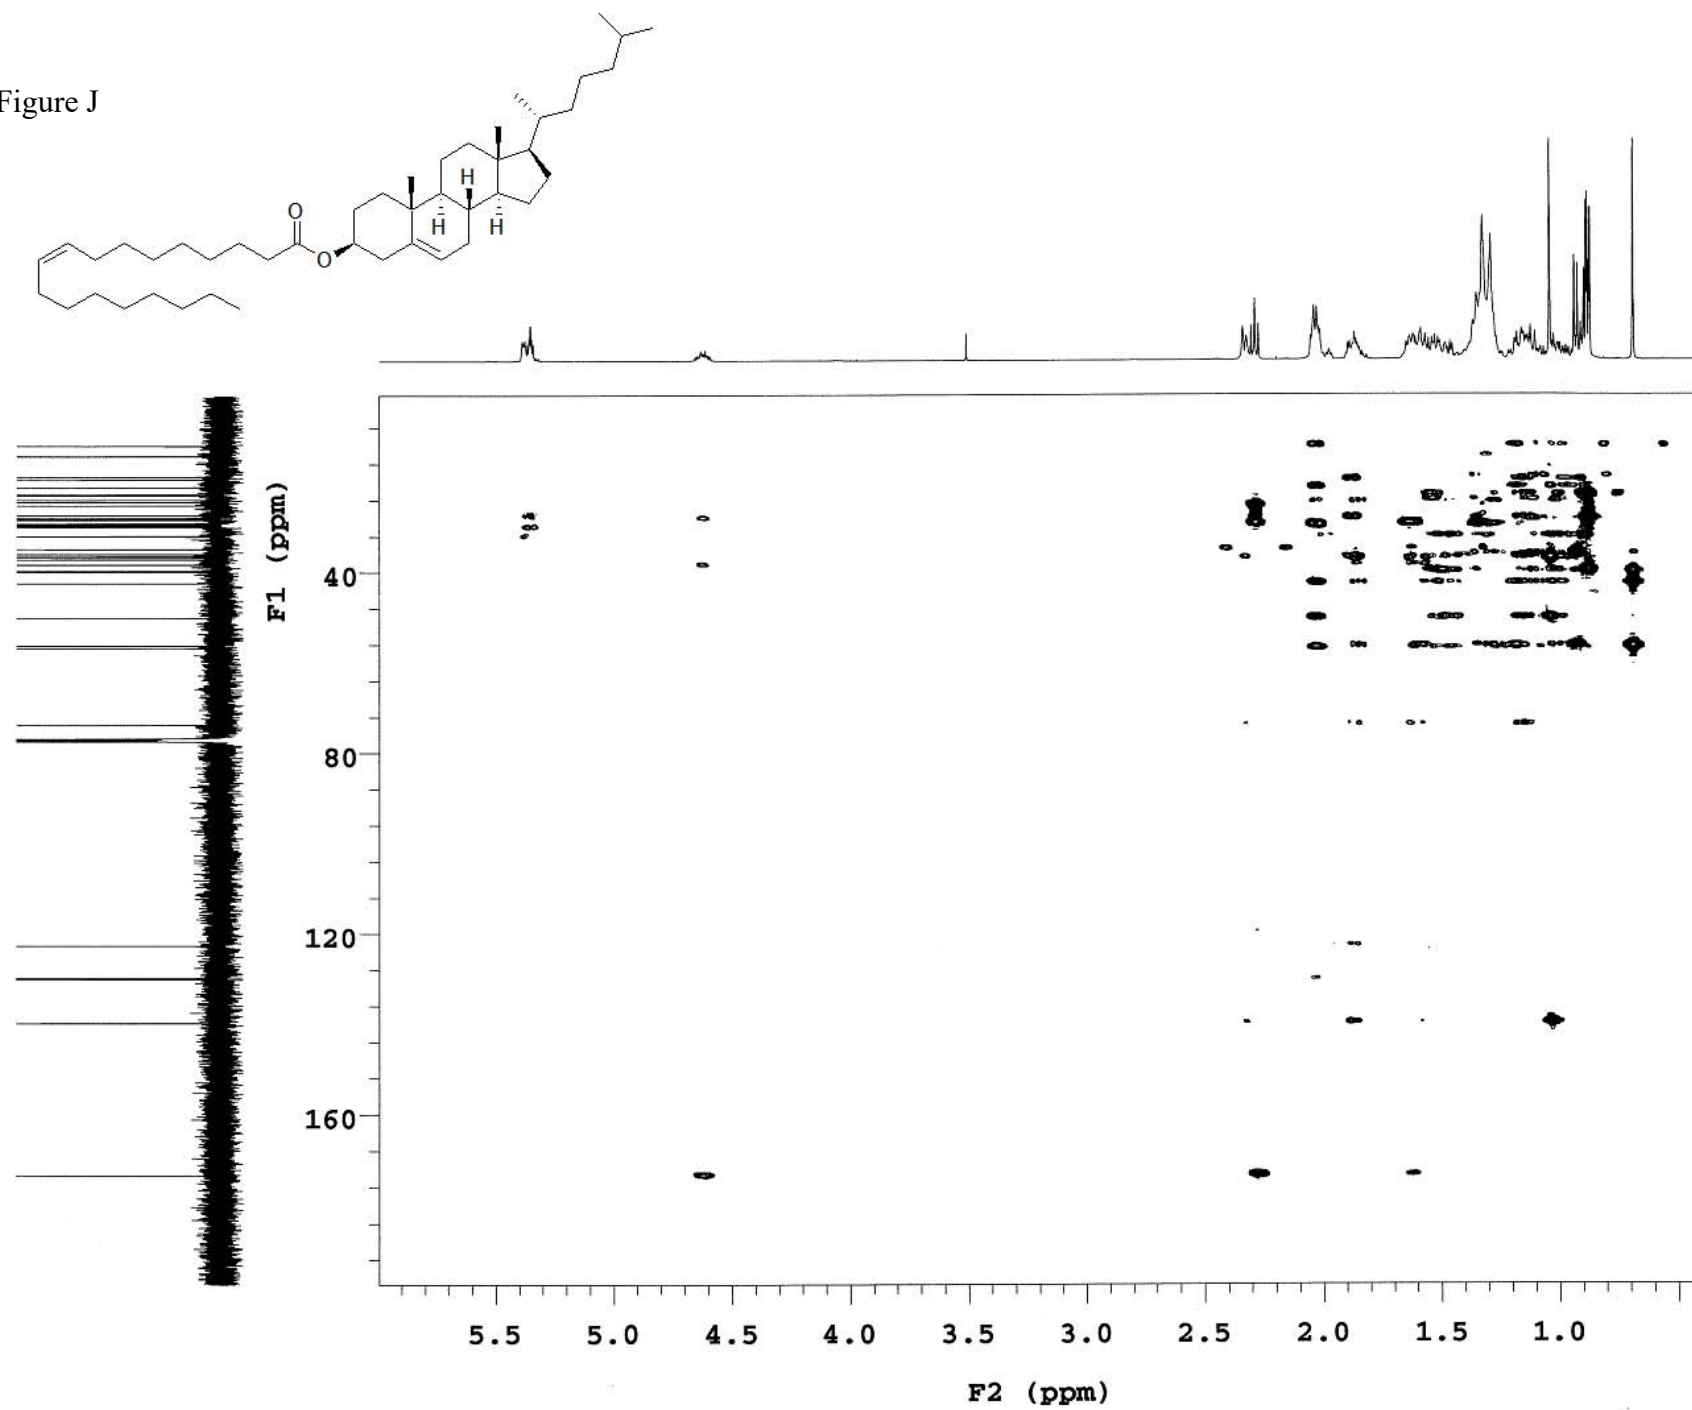

Figure K

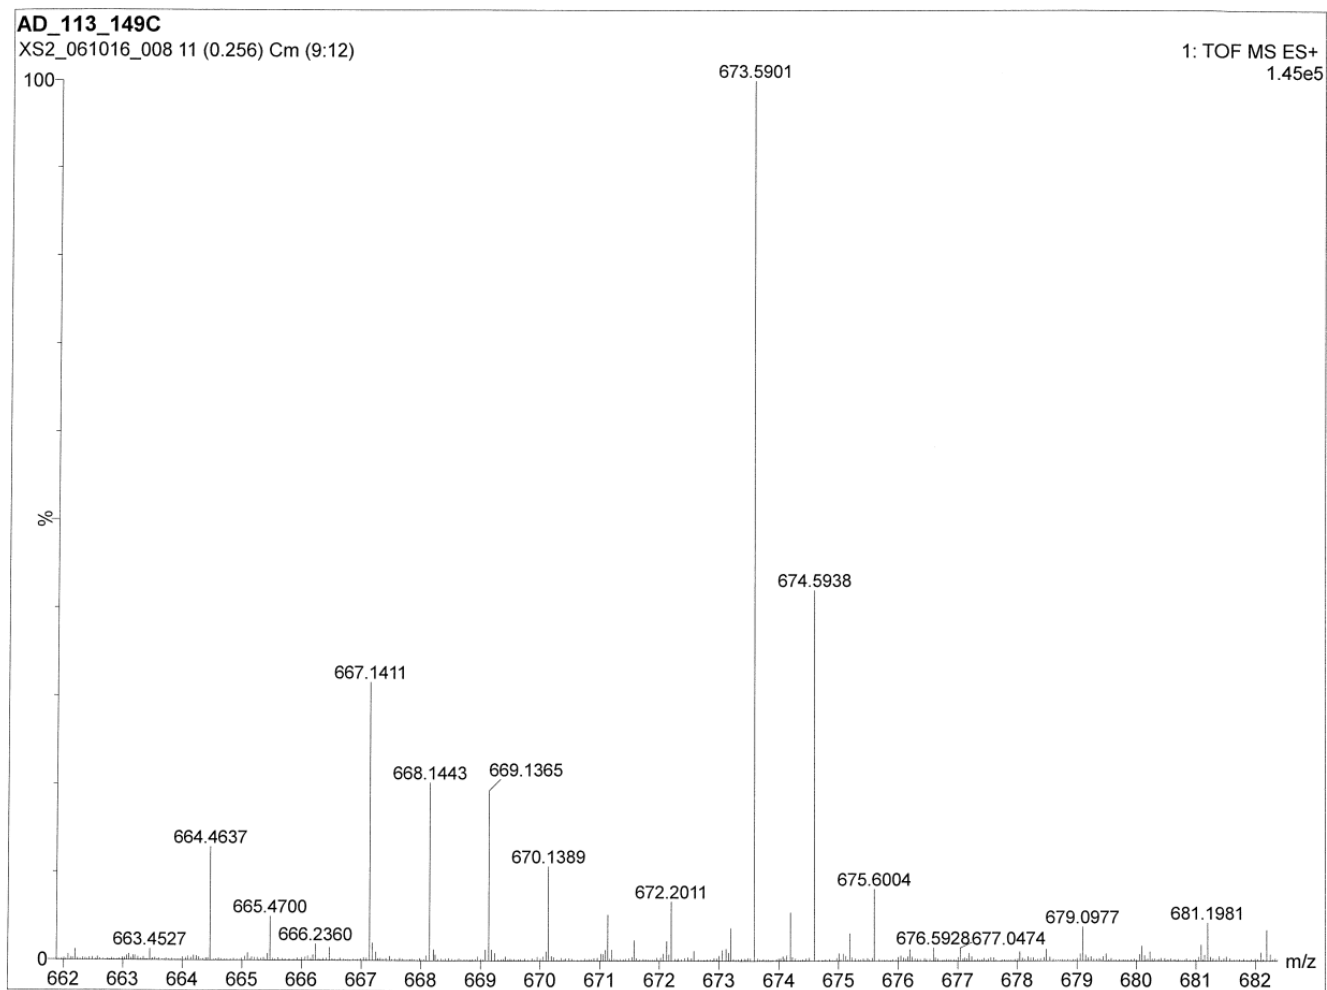

Figure L

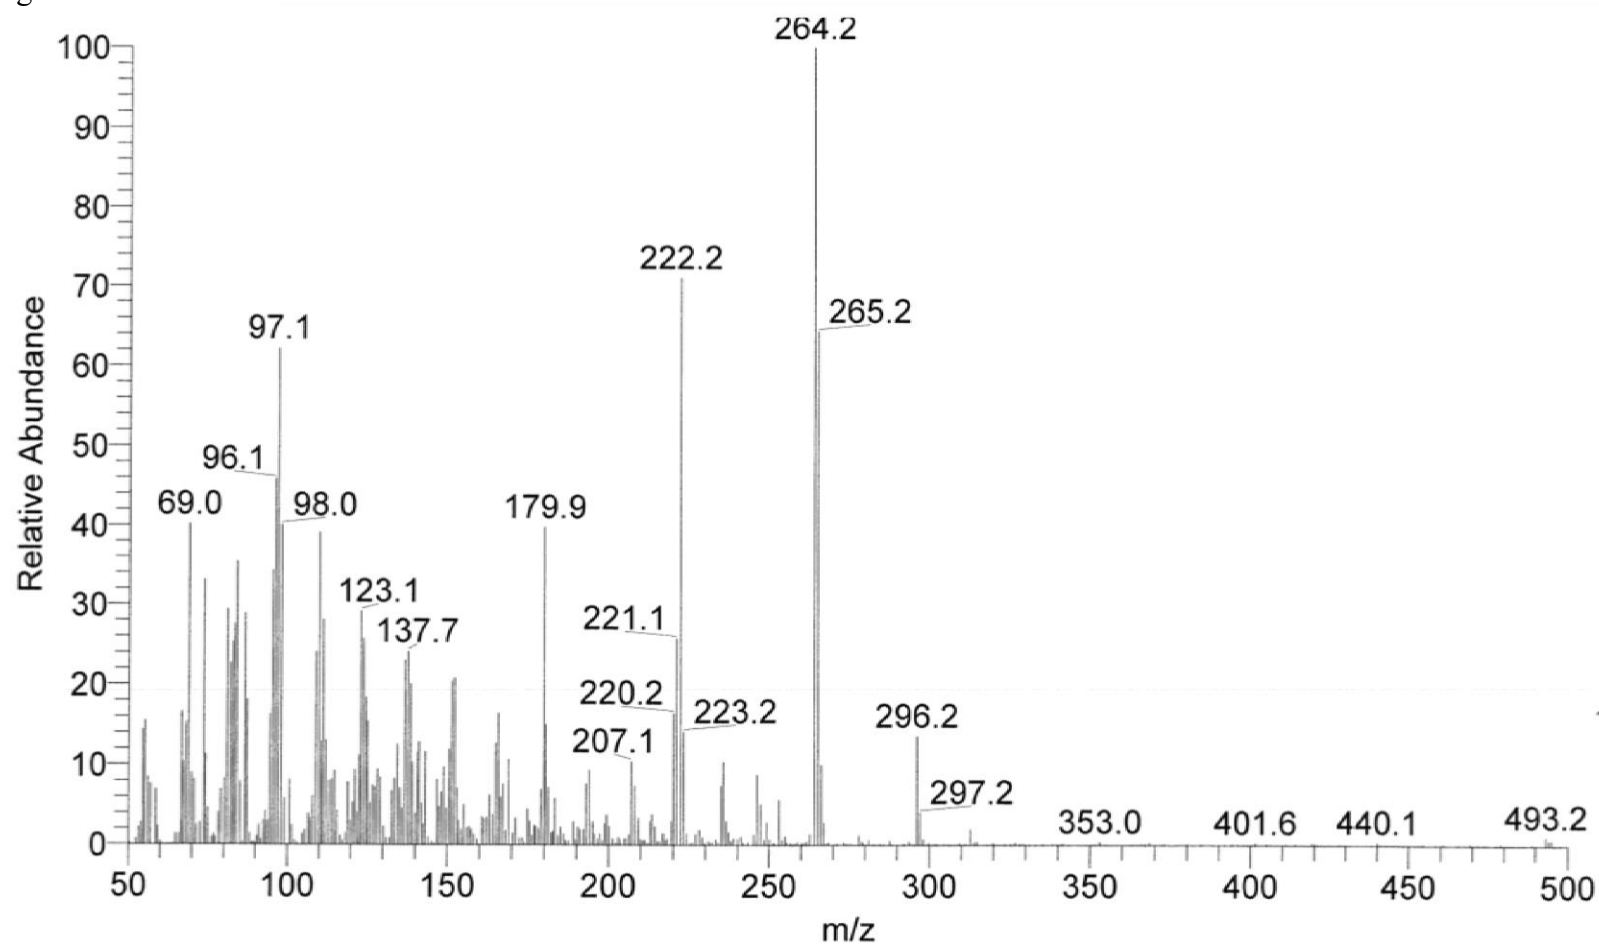

Figure M

Sample Name:  
AD\_113\_149D  
Data Collected on:  
ormuzd-vnmrs500  
Archive directory:  
/home/walkup/vnmrsys/data/amilad  
Sample directory:  
AD\_113\_149D\_20160604\_02  
FidFile: AD\_113\_149D\_PROTON\_01

Pulse Sequence: PROTON (s2pul)  
Solvent: cdcl3  
Data collected on: Jun 4 2016

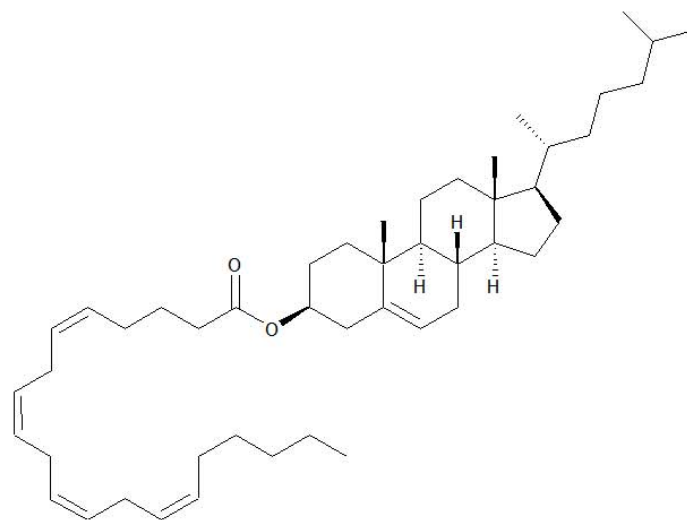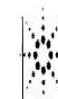

Agilent Technologies

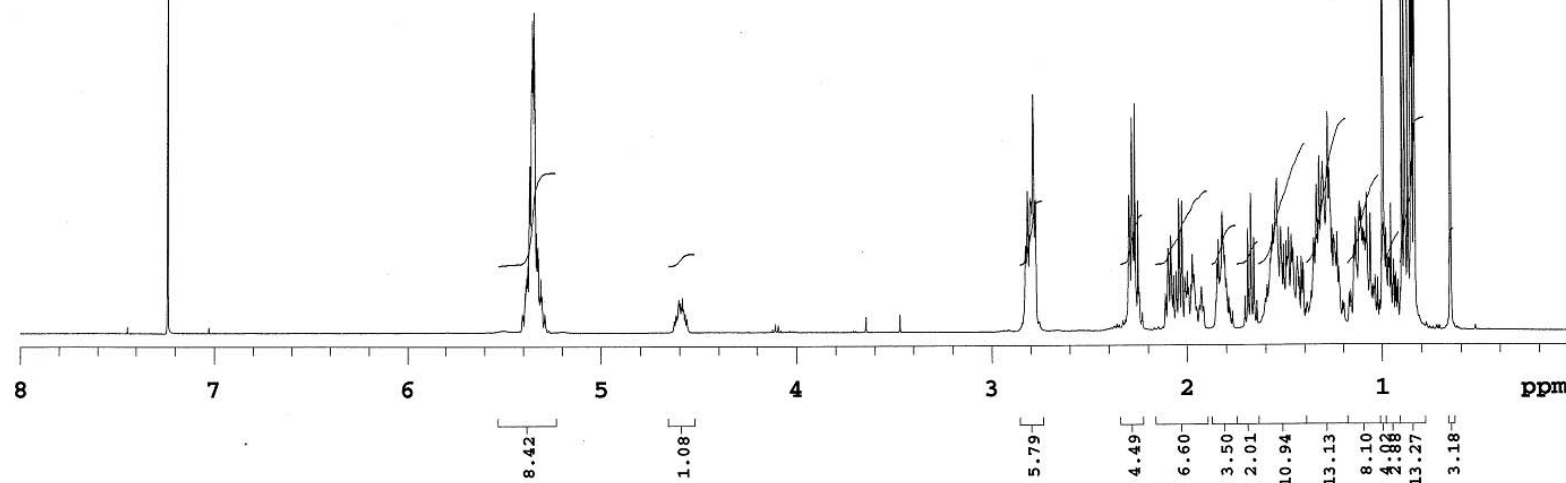

Figure N

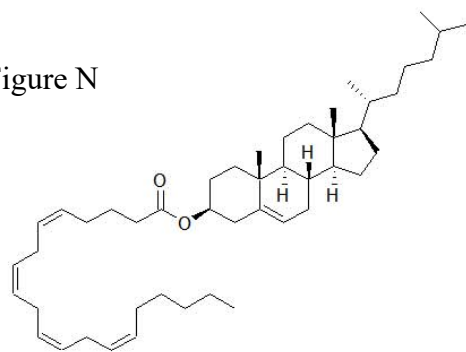

 Agilent Technologies

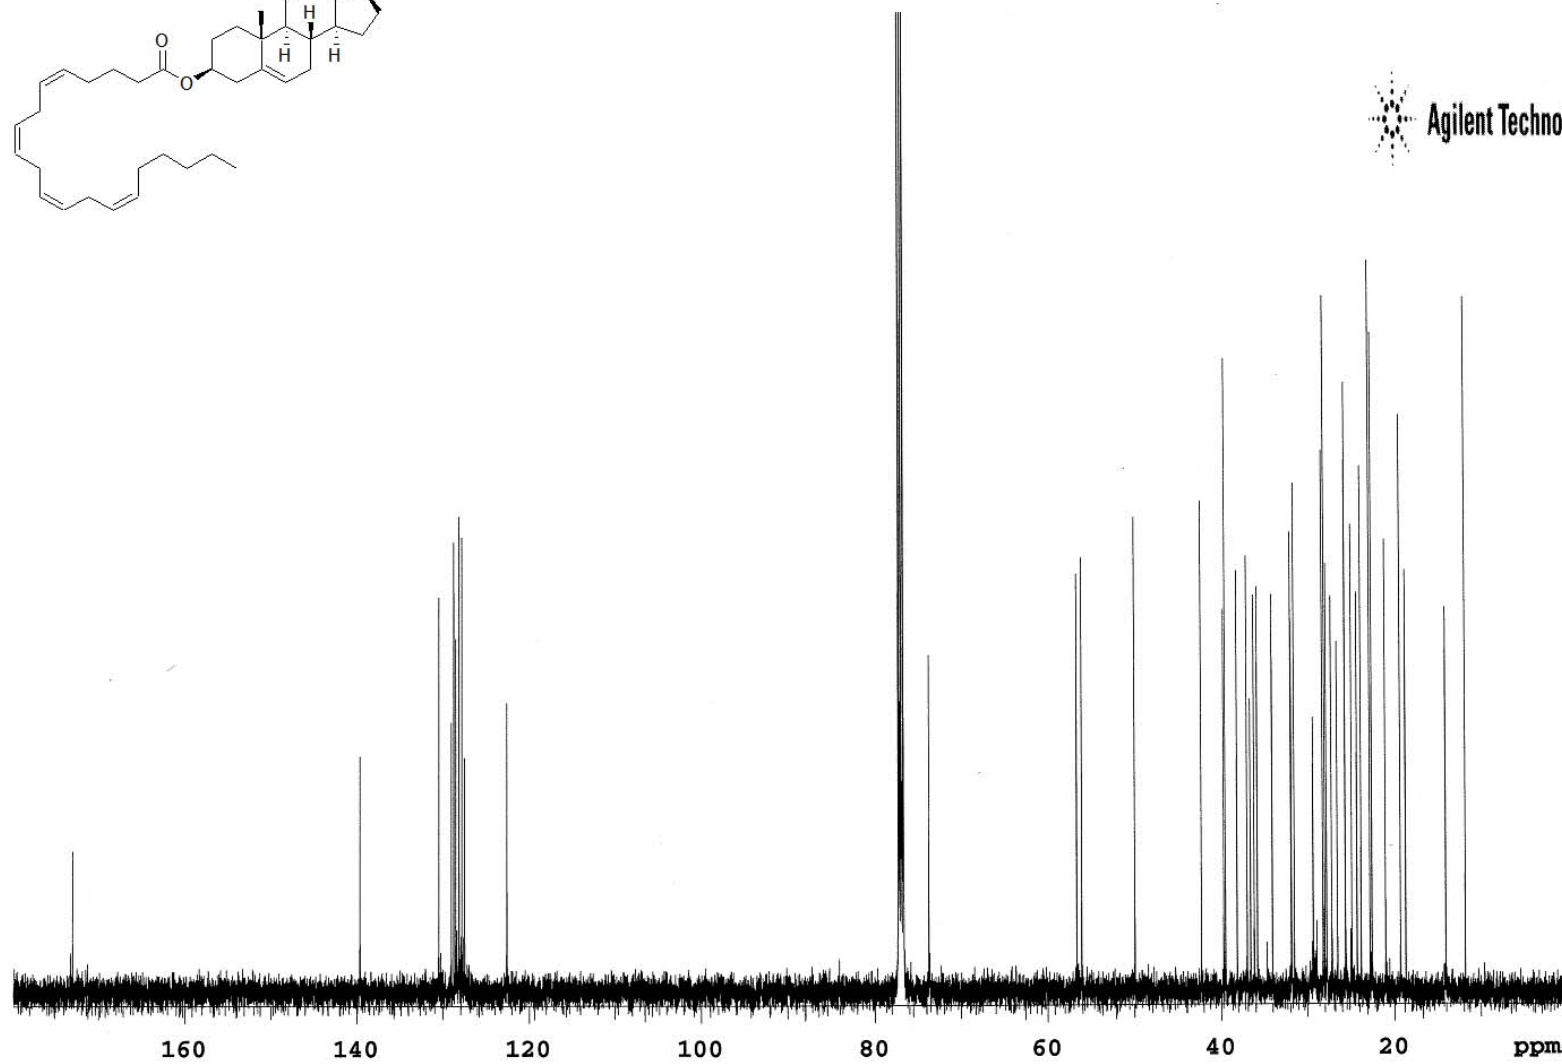

Figure O

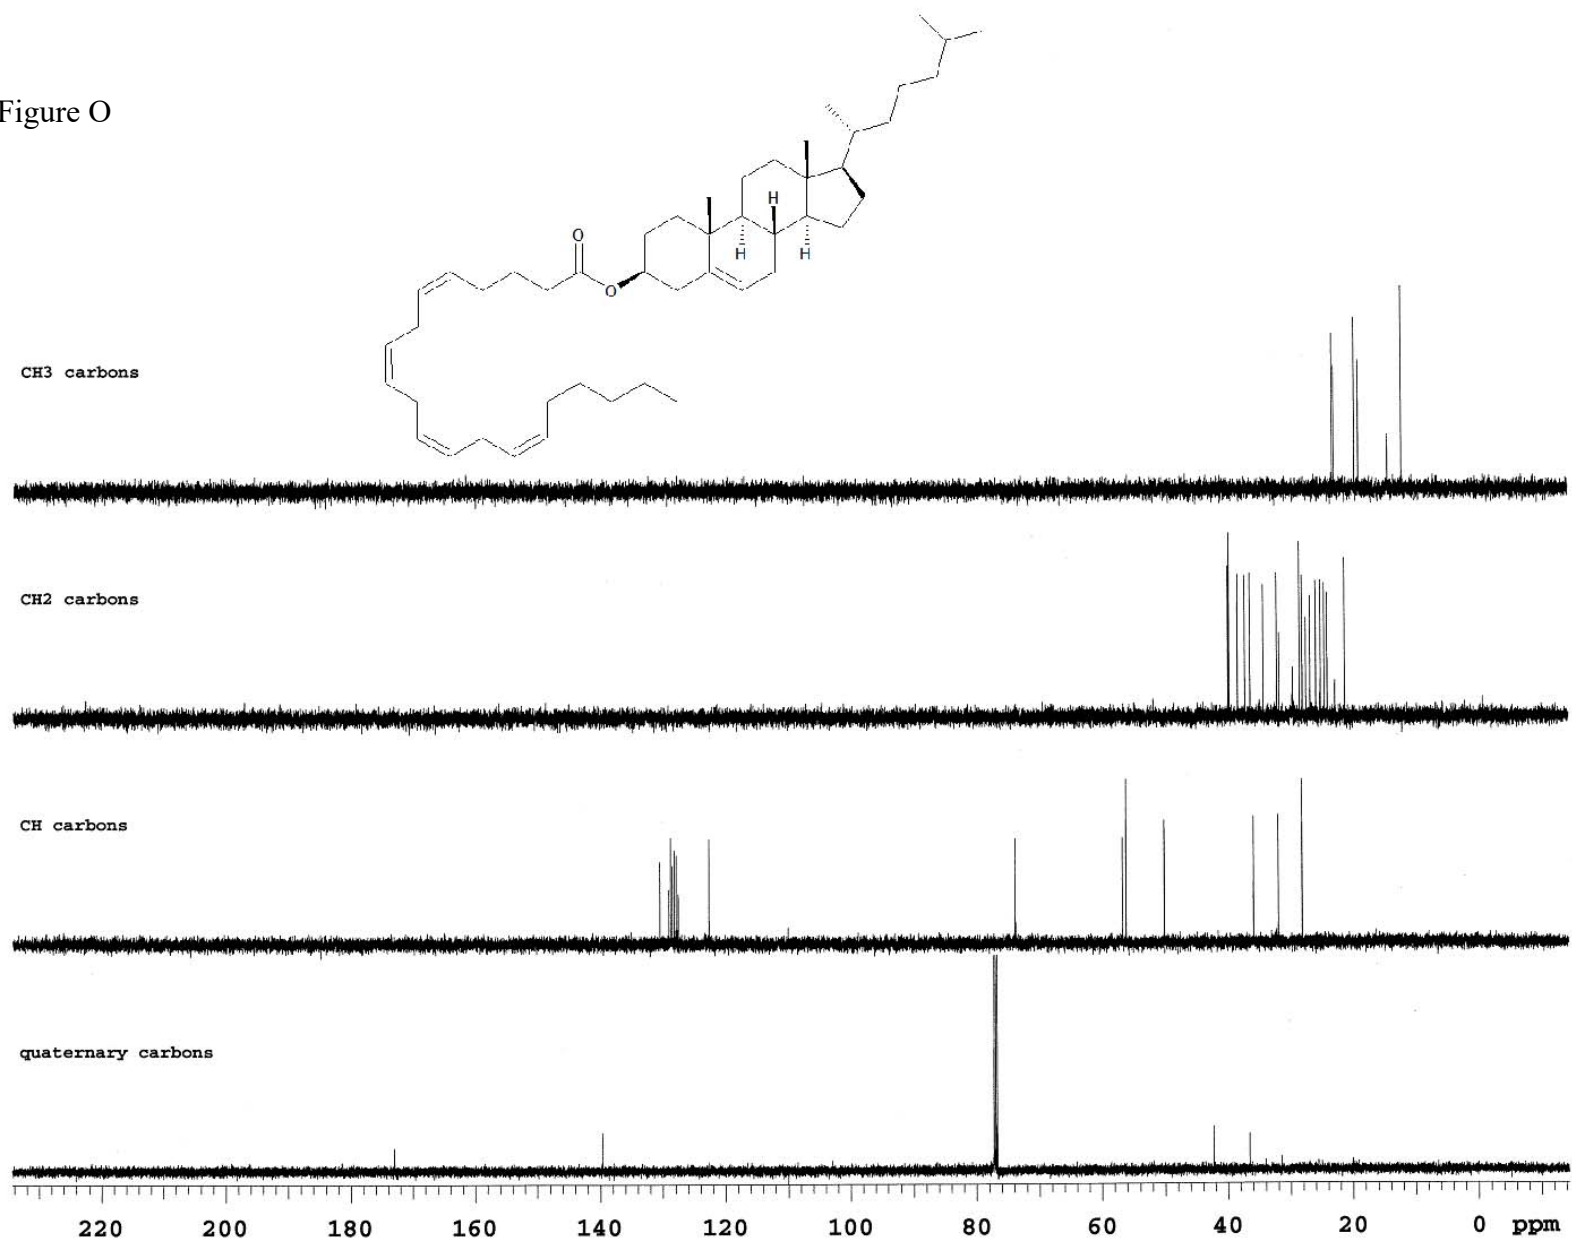



Figure P

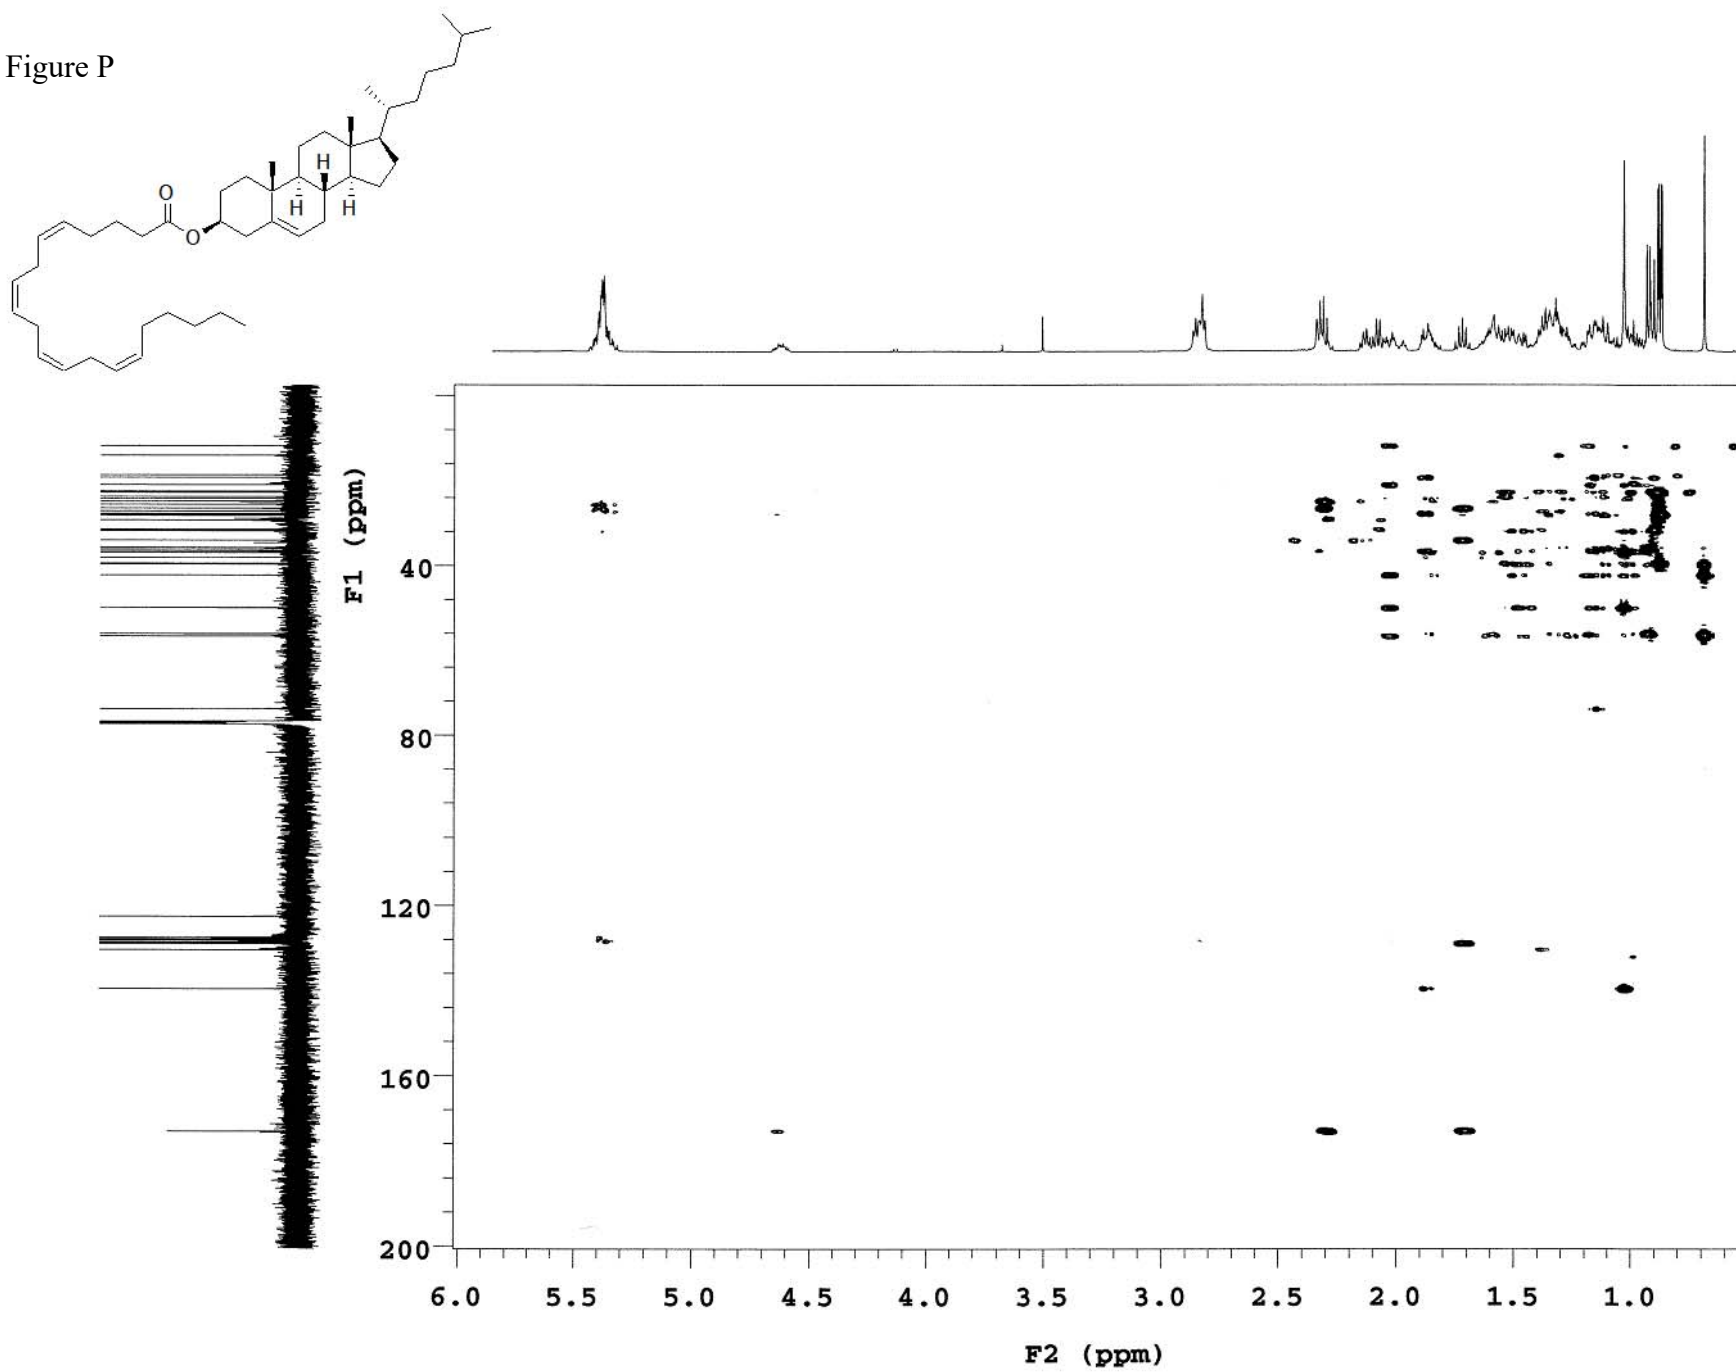

Figure Q

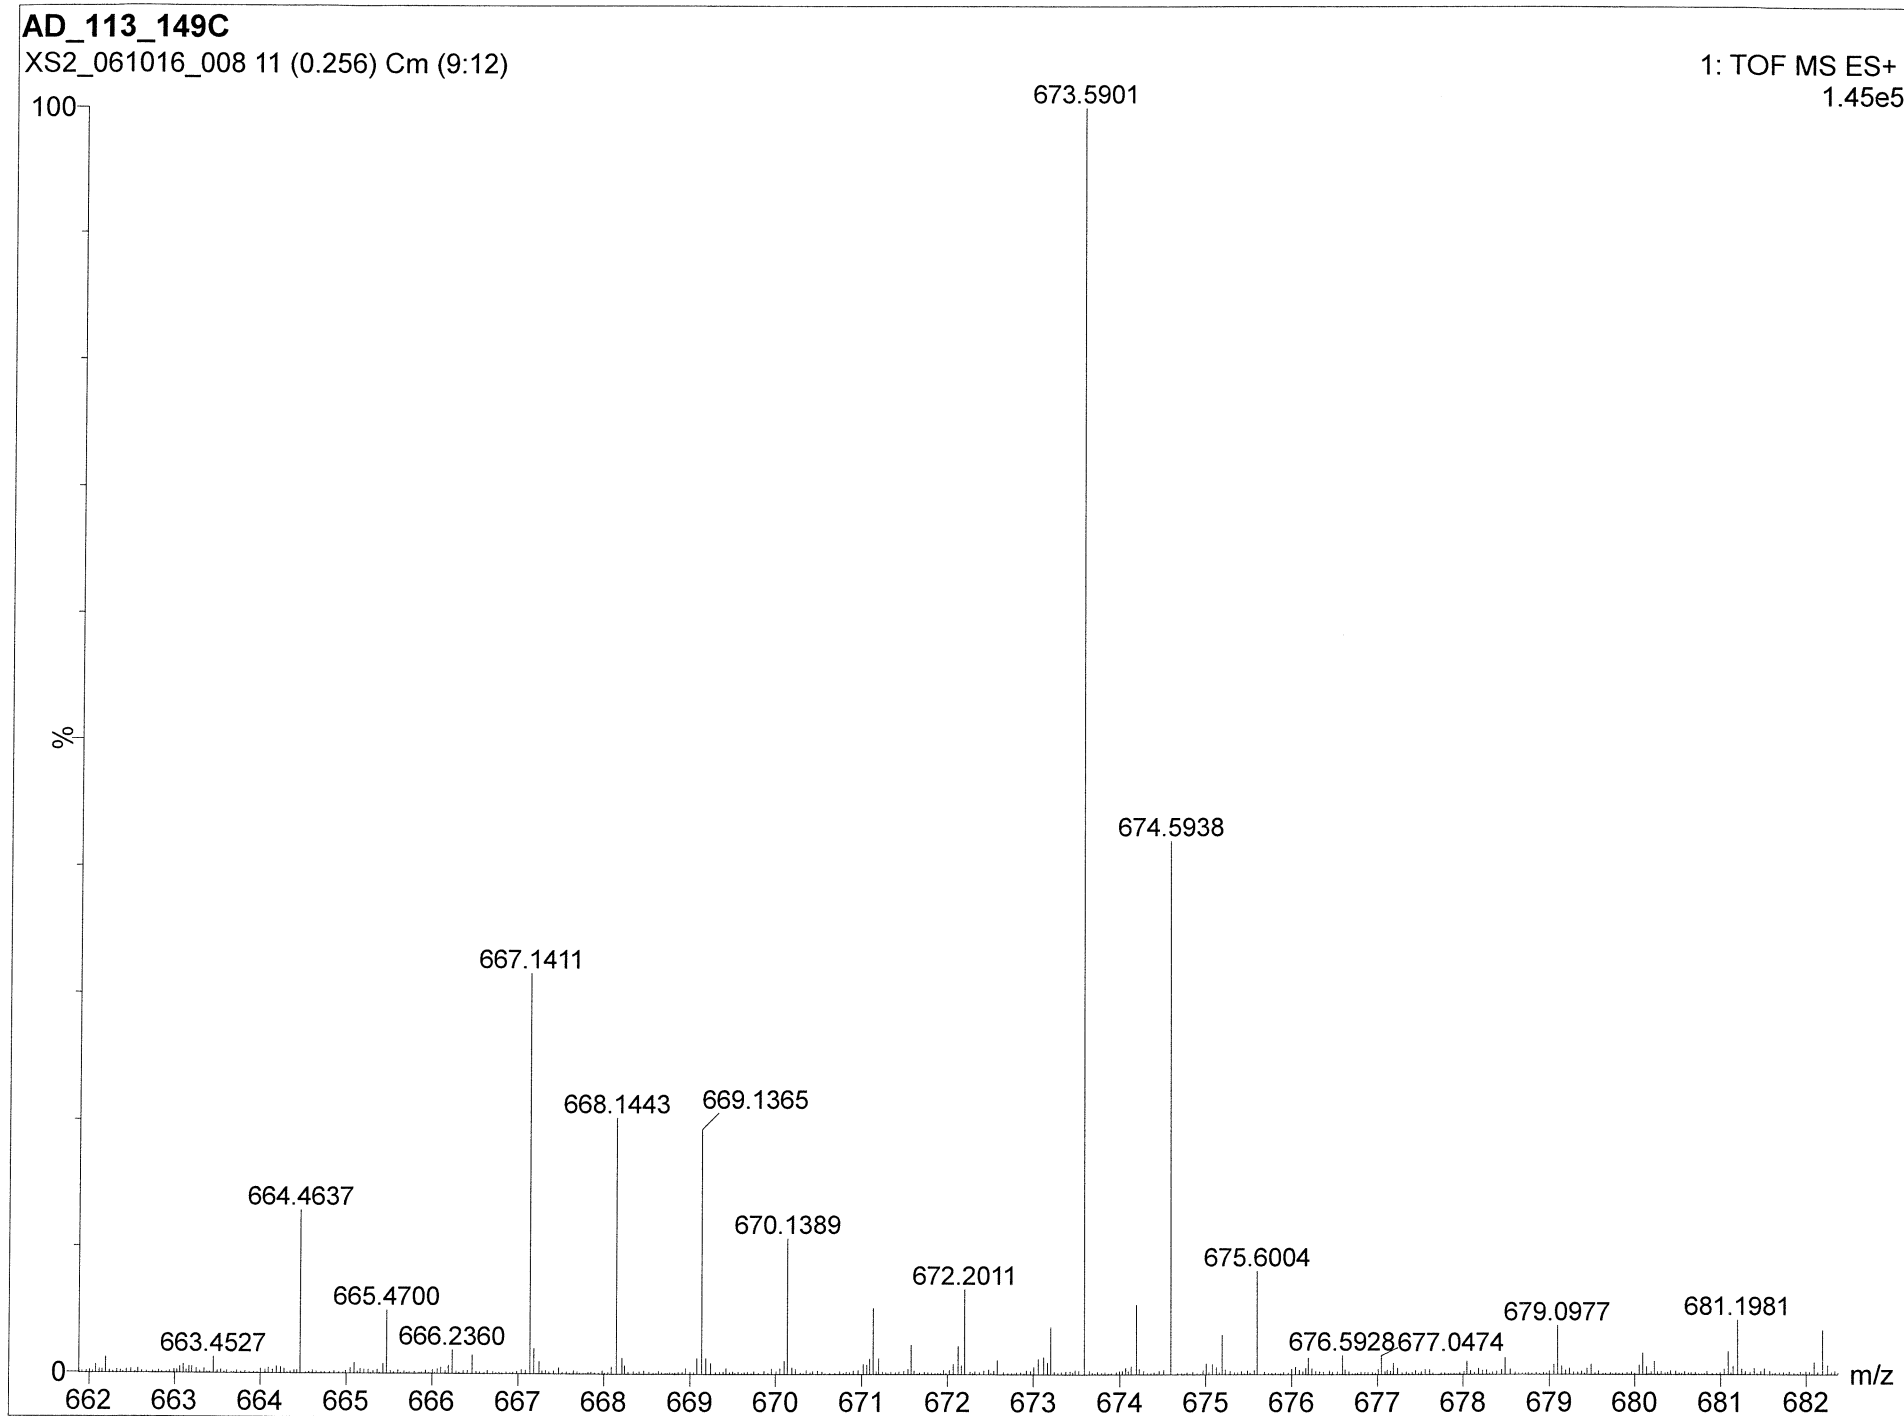

Figure R

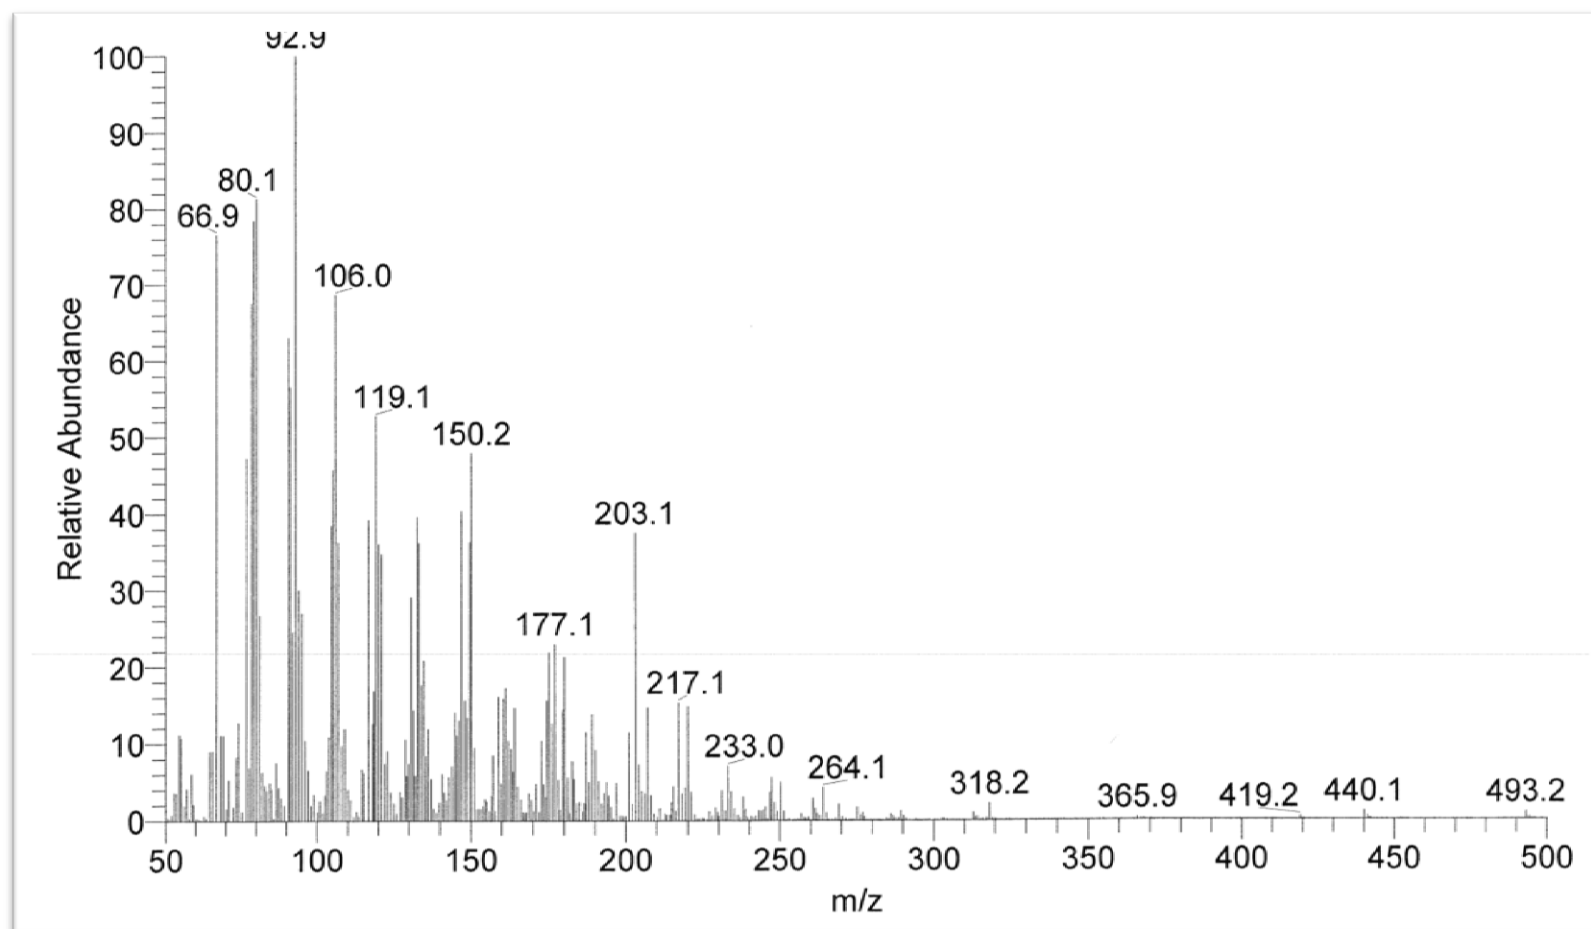

Figure S

Sample Name:  
AD\_113\_149E  
Data Collected on:  
ahriman-vnmrs500  
Archive directory:  
/home/walkup/vnmrsys/data/amilad  
Sample directory:  
AD\_113\_149E\_20160528\_01  
FidFile: AD\_113\_149E\_PROTON\_01  
  
Pulse Sequence: PROTON (s2pul)  
Solvent: cdcl3  
Data collected on: May 28 2016

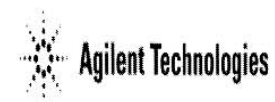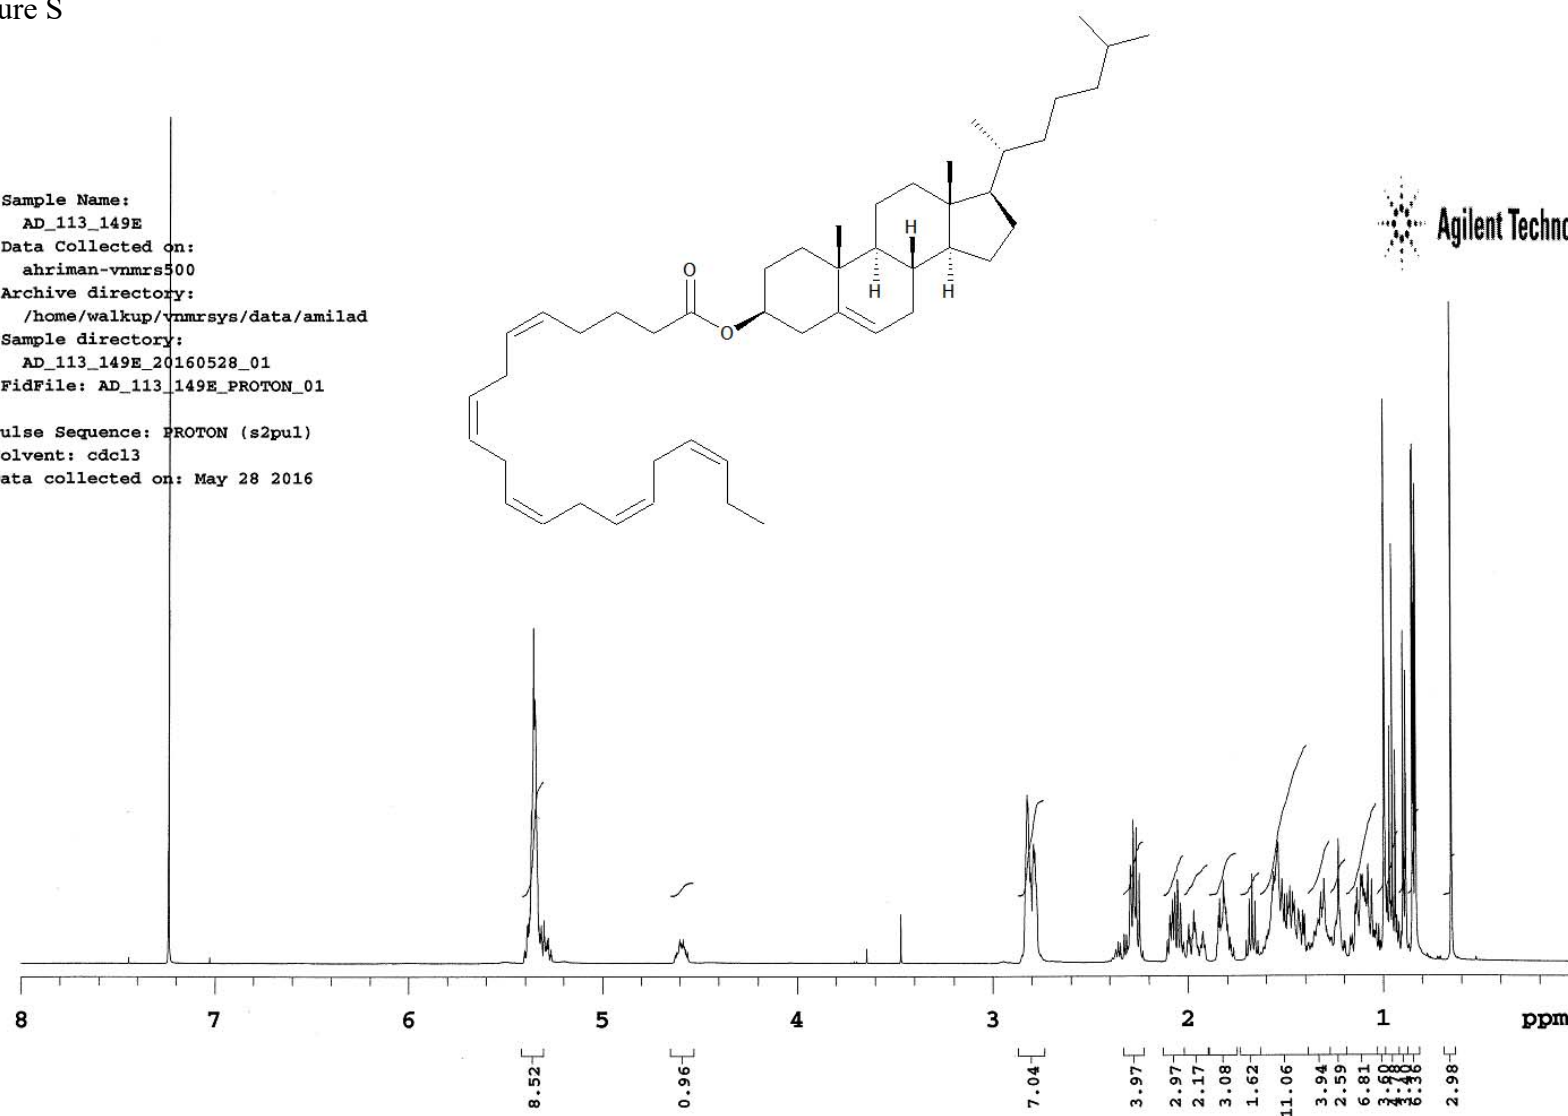

Figure T

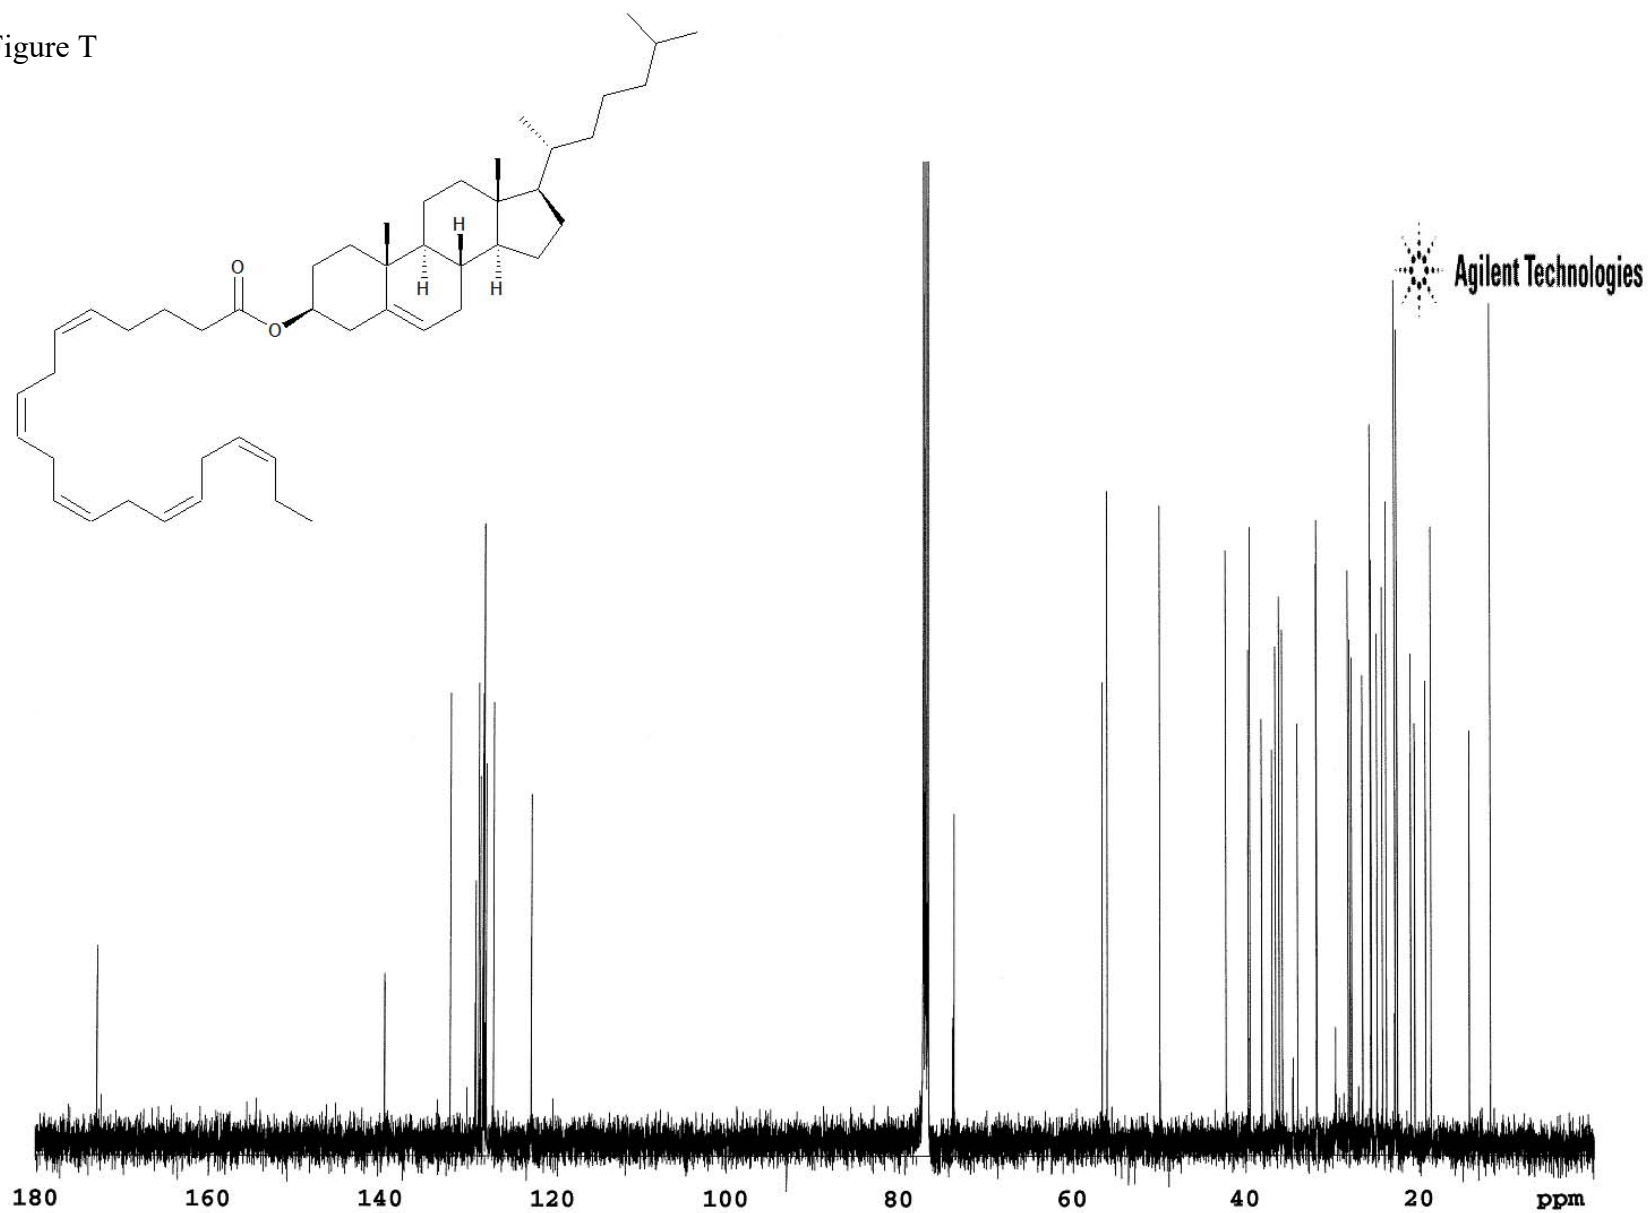

Figure U

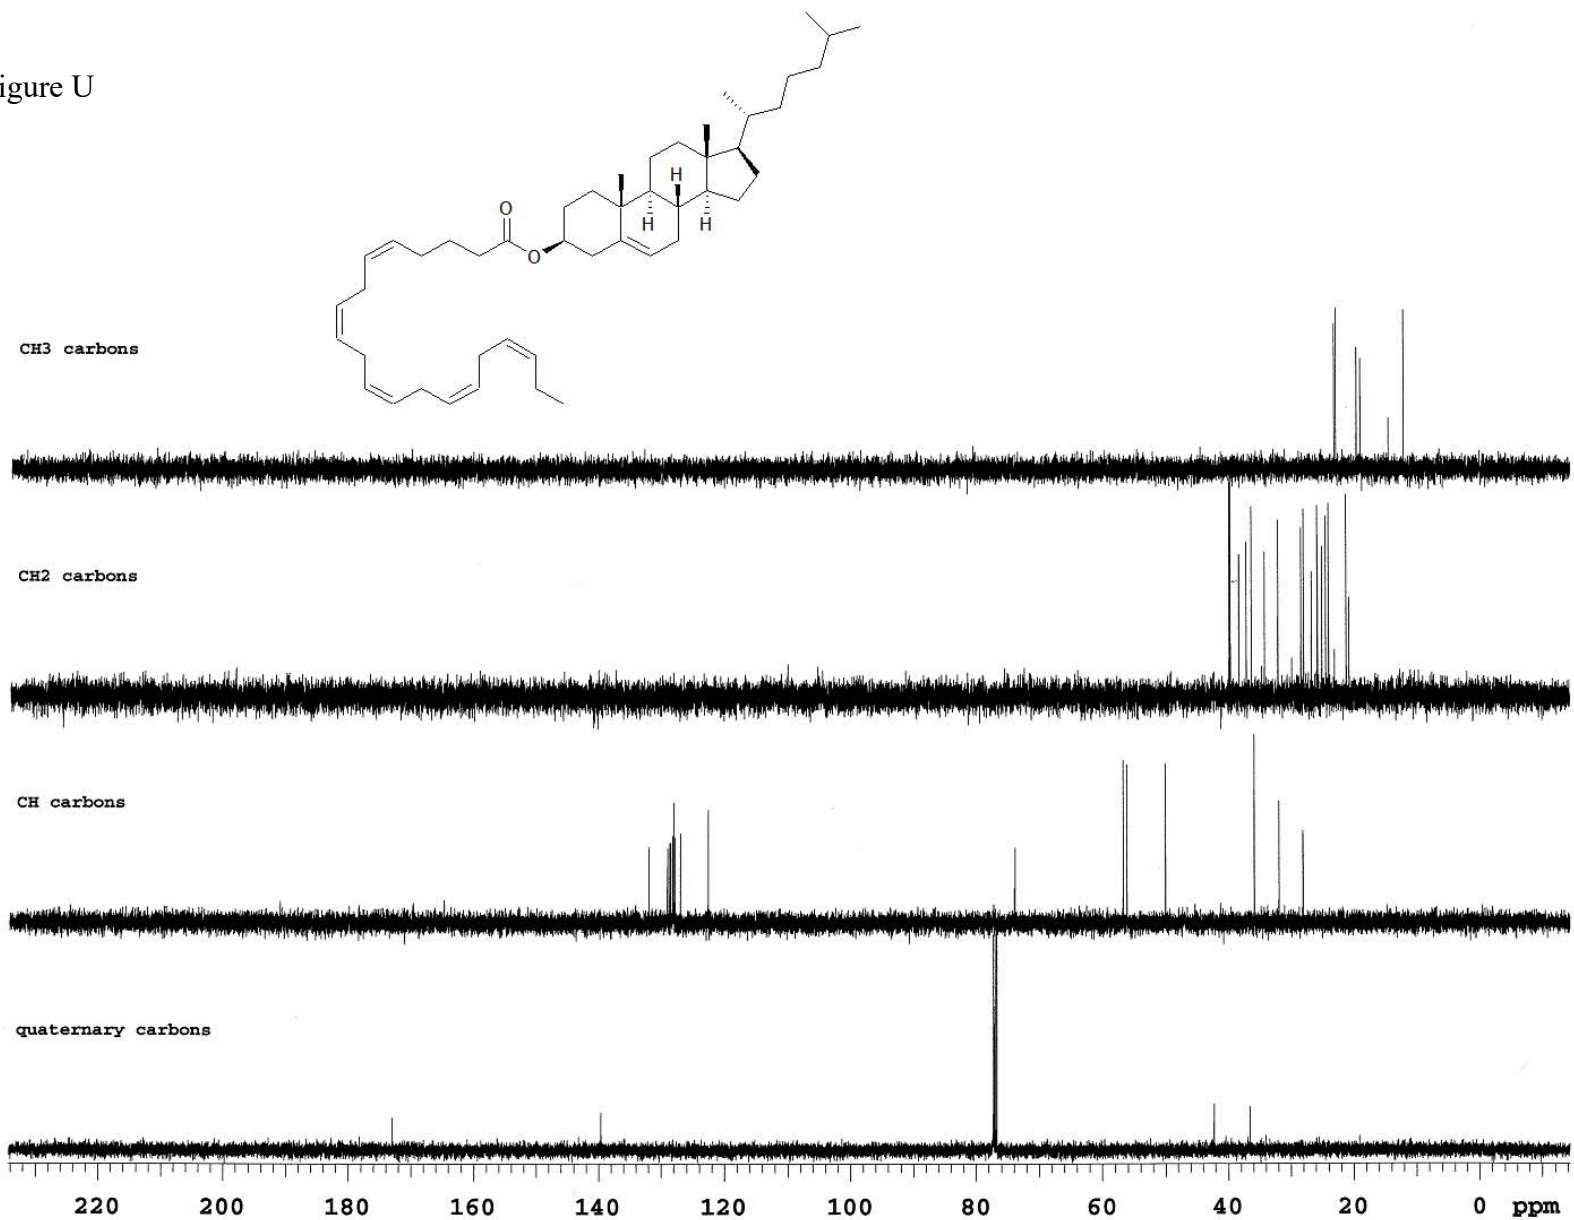

Figure V

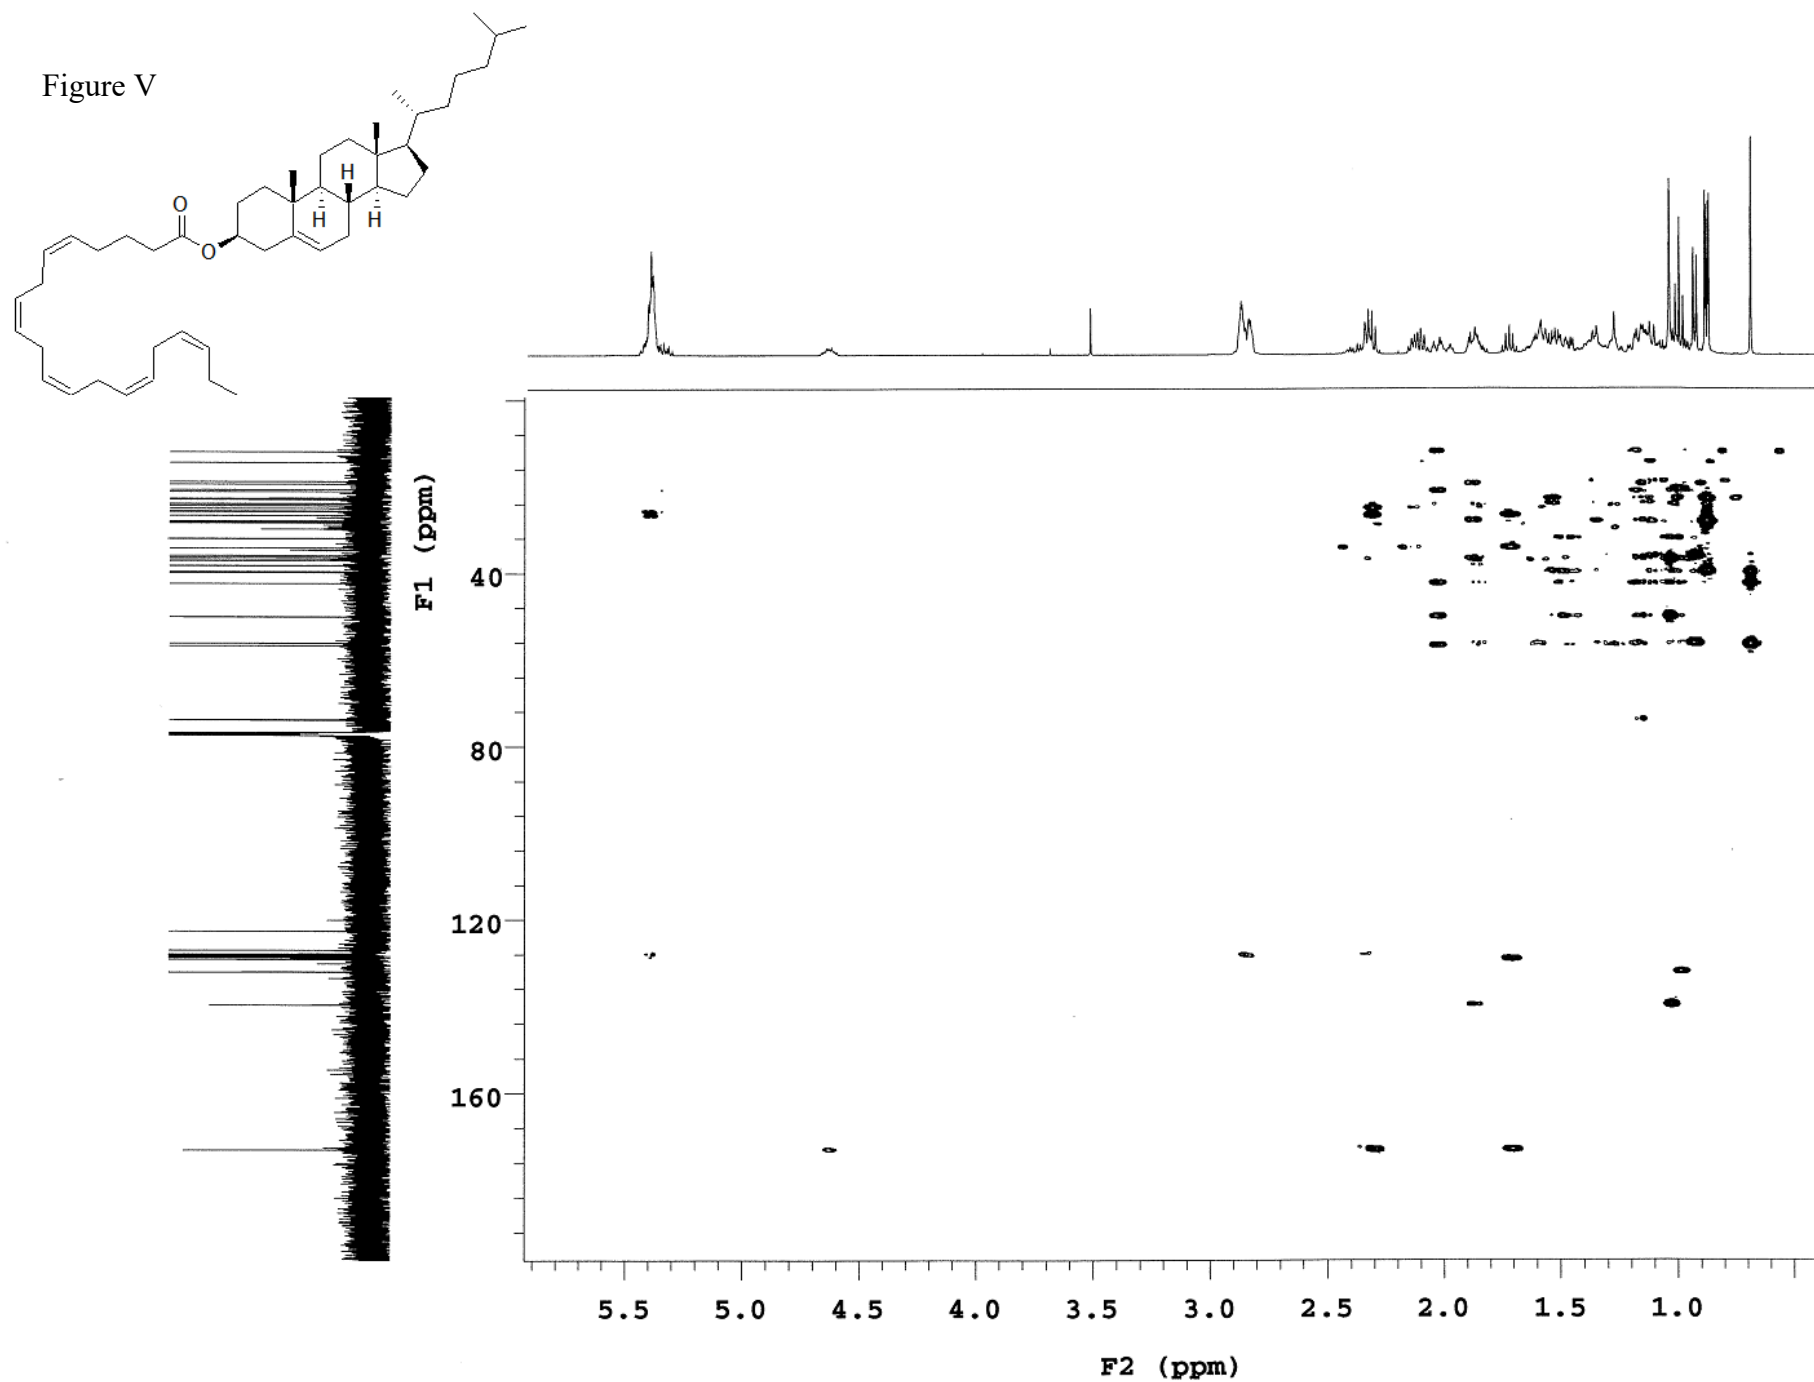

Figure W

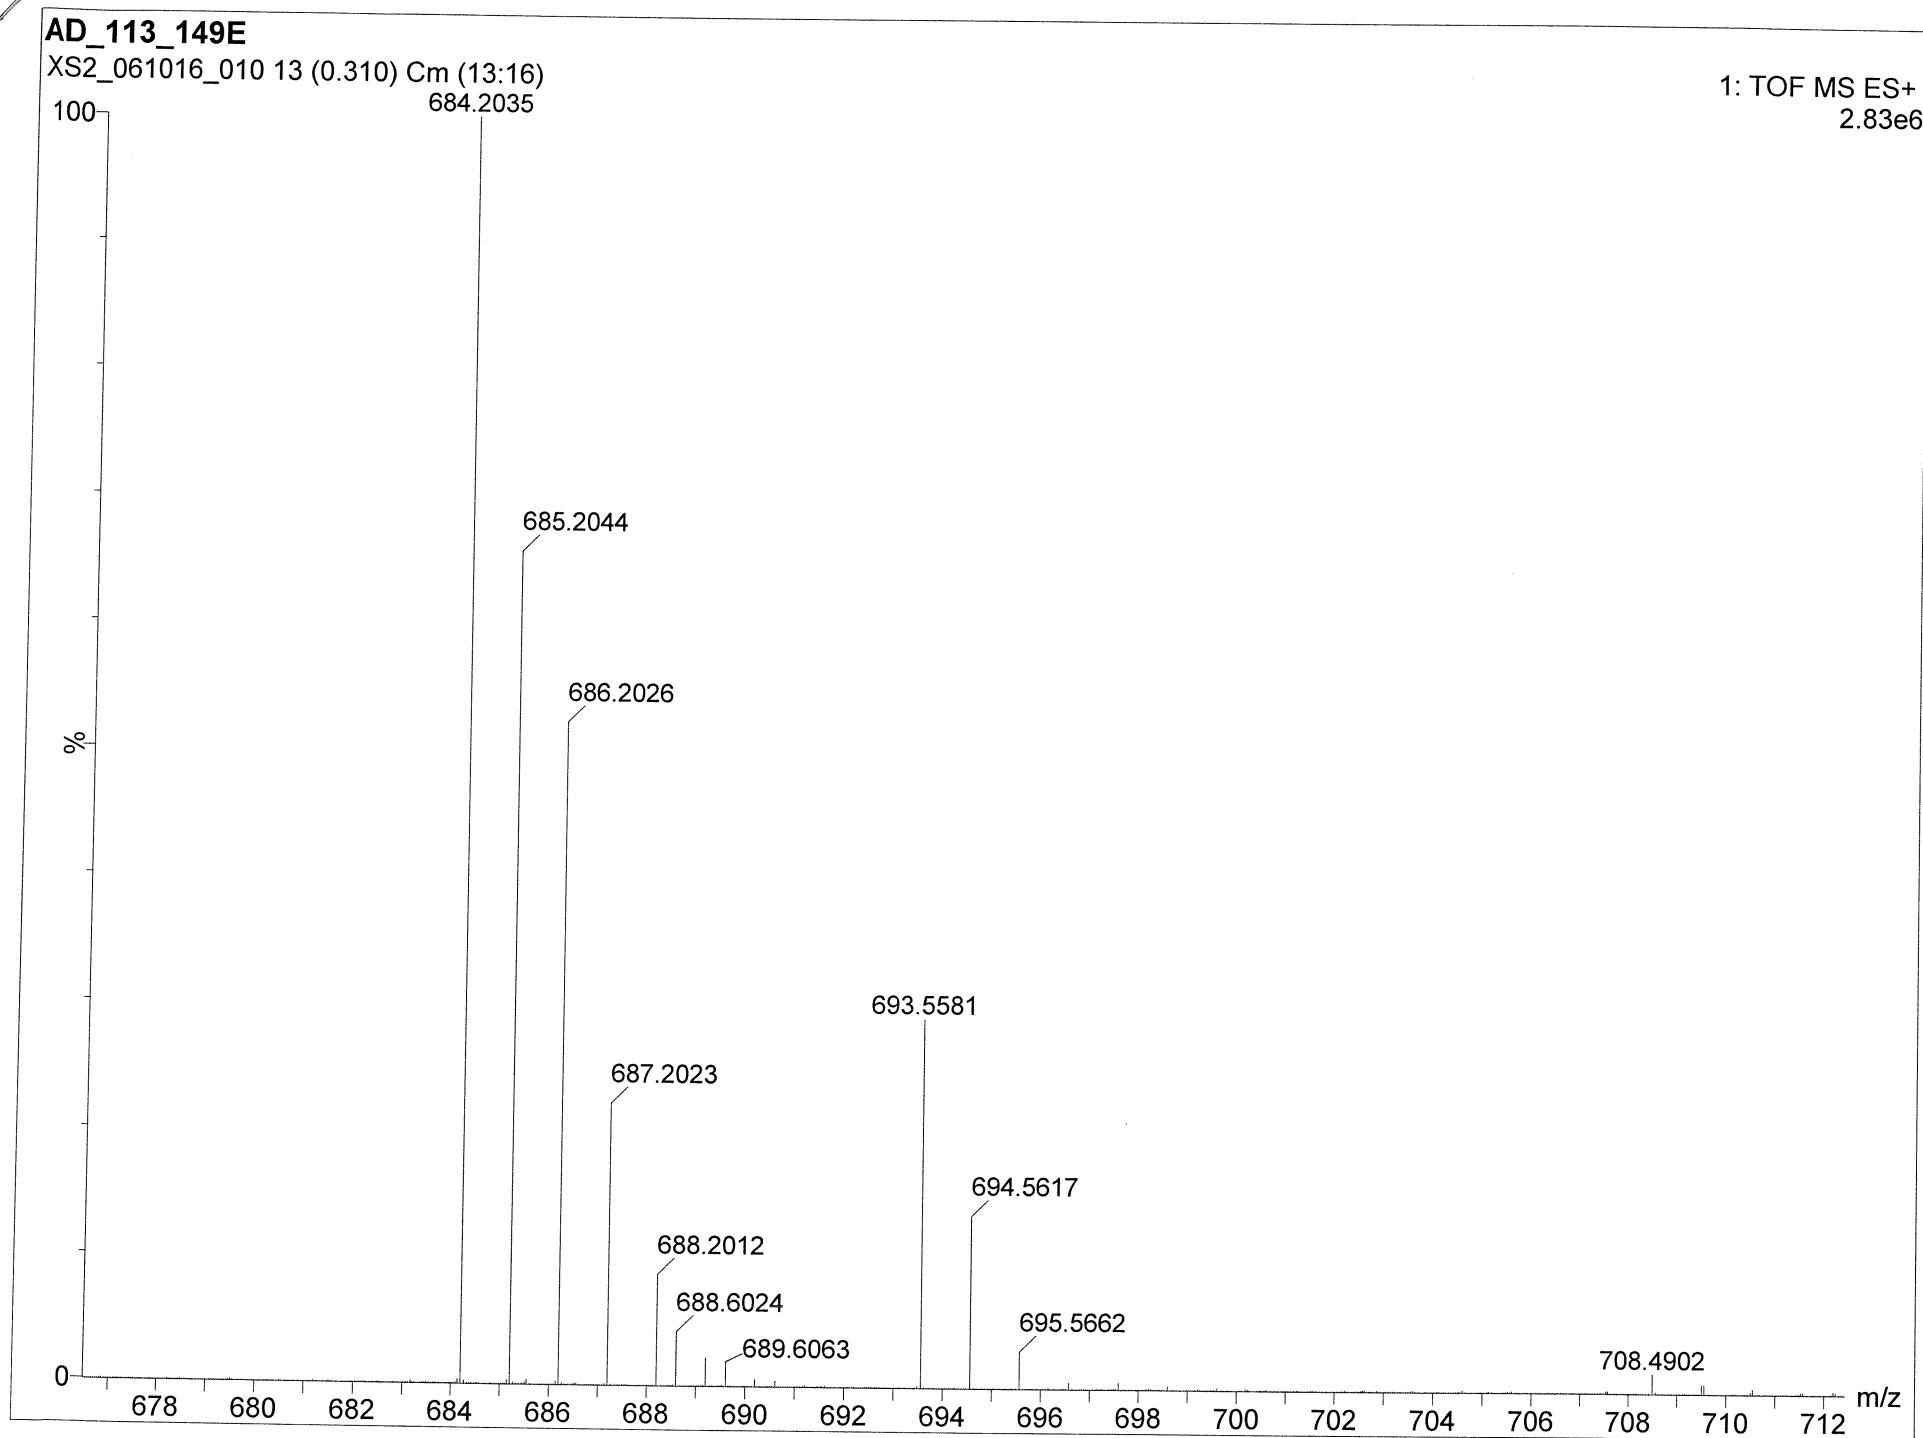



Figure X

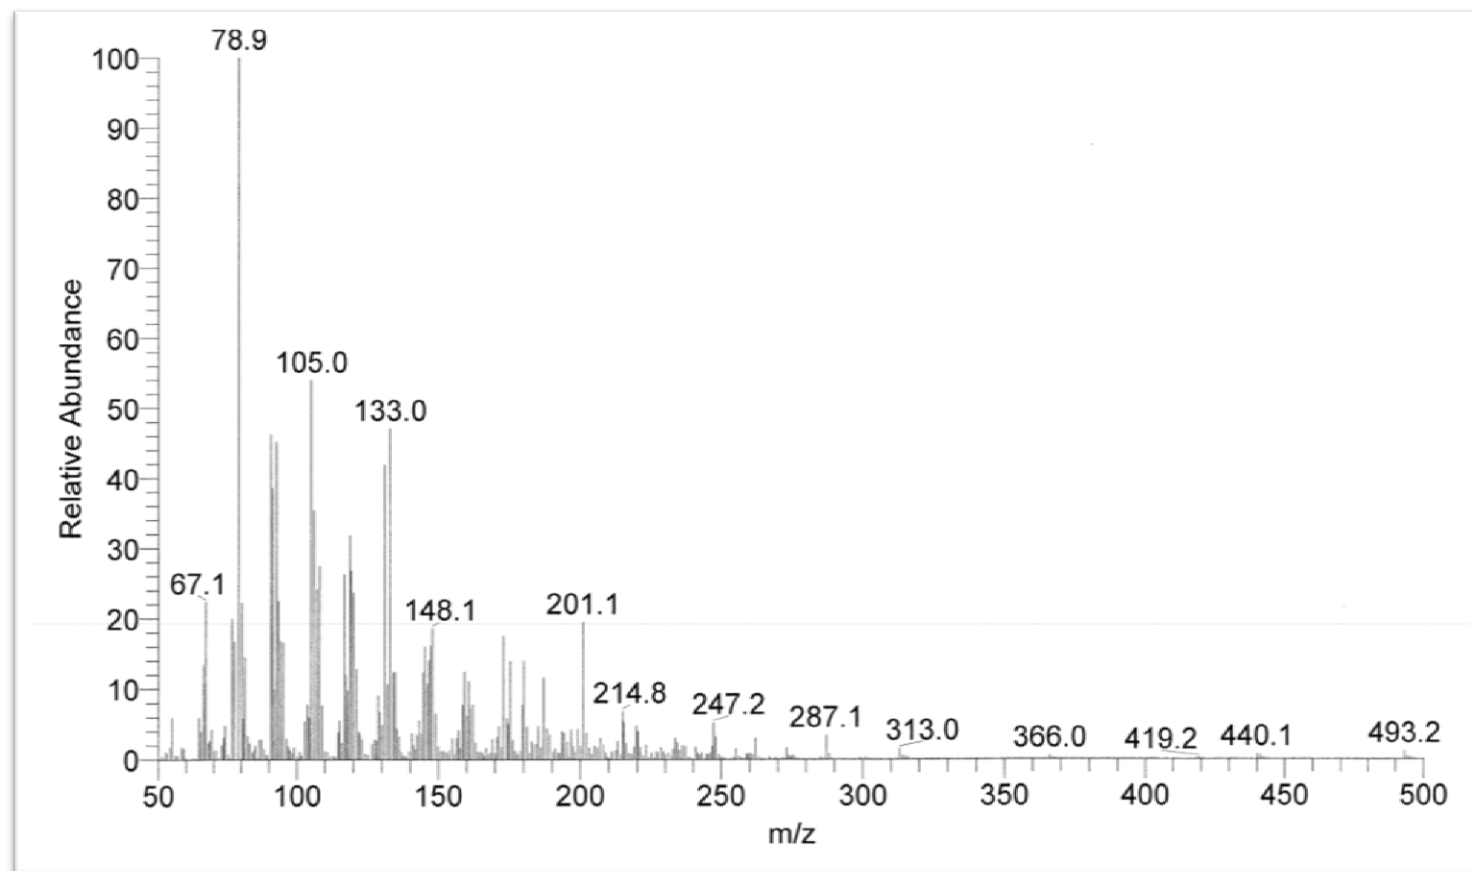

Supplement: Supplementary file [file 1]
